# Supplementary material for: Developing the FEEDS toolkit of parent-delivered interventions for eating, drinking and swallowing difficulties in young children with neurodisability: findings from a Delphi survey and stakeholder consultation workshops
Source: PubMed Central journal article supplement — BMJ Paediatr Open. 2022 Apr 28;6(1):e001425. doi: 10.1136/bmjpo-2022-001425 (PMC9058804; doi:10.1136/bmjpo-2022-001425), 2022-04-28
Supplement: bmjpo-2022-001425.draft_revisions.pdf [file bmjpo-2022-001425.draft_revisions.pdf]

# BMJ Paediatrics Open

BMJ Paediatrics Open is committed to open peer review. As part of this commitment we make the peer review history of every article we publish publicly available.

When an article is published we post the peer reviewers' comments and the authors' responses online. We also post the versions of the paper that were used during peer review. These are the versions that the peer review comments apply to.

The versions of the paper that follow are the versions that were submitted during the peer review process. They are not the versions of record or the final published versions. They should not be cited or distributed as the published version of this manuscript.

BMJ Paediatrics Open is an open access journal and the full, final, typeset and author-corrected version of record of the manuscript is available on our site with no access controls, subscription charges or pay-per-view fees (<http://bmjpaedsopen.bmj.com>).

If you have any questions on BMJ Paediatrics Open's open peer review process please email [info.bmjpo@bmj.com](mailto:info.bmjpo@bmj.com)

# BMJ Paediatrics Open

## Developing the FEEDS Toolkit of parent-delivered interventions for eating, drinking and swallowing difficulties in young children with neurodisability: Findings from a Delphi survey and stakeholder consultation workshops

|                               |                                                                                                                                                                                                                                                                                                                                                                                                                                                                                                                                                                                                                                                                                                                                                                                                                                                                                                                                                                                                                                                                                                                                                                                                                                                                                                                                                                                                                                                                                                                                                                                                                                   |
|-------------------------------|-----------------------------------------------------------------------------------------------------------------------------------------------------------------------------------------------------------------------------------------------------------------------------------------------------------------------------------------------------------------------------------------------------------------------------------------------------------------------------------------------------------------------------------------------------------------------------------------------------------------------------------------------------------------------------------------------------------------------------------------------------------------------------------------------------------------------------------------------------------------------------------------------------------------------------------------------------------------------------------------------------------------------------------------------------------------------------------------------------------------------------------------------------------------------------------------------------------------------------------------------------------------------------------------------------------------------------------------------------------------------------------------------------------------------------------------------------------------------------------------------------------------------------------------------------------------------------------------------------------------------------------|
| Journal:                      | <i>BMJ Paediatrics Open</i>                                                                                                                                                                                                                                                                                                                                                                                                                                                                                                                                                                                                                                                                                                                                                                                                                                                                                                                                                                                                                                                                                                                                                                                                                                                                                                                                                                                                                                                                                                                                                                                                       |
| Manuscript ID                 | bmjpo-2022-001425                                                                                                                                                                                                                                                                                                                                                                                                                                                                                                                                                                                                                                                                                                                                                                                                                                                                                                                                                                                                                                                                                                                                                                                                                                                                                                                                                                                                                                                                                                                                                                                                                 |
| Article Type:                 | Original research                                                                                                                                                                                                                                                                                                                                                                                                                                                                                                                                                                                                                                                                                                                                                                                                                                                                                                                                                                                                                                                                                                                                                                                                                                                                                                                                                                                                                                                                                                                                                                                                                 |
| Date Submitted by the Author: | 19-Jan-2022                                                                                                                                                                                                                                                                                                                                                                                                                                                                                                                                                                                                                                                                                                                                                                                                                                                                                                                                                                                                                                                                                                                                                                                                                                                                                                                                                                                                                                                                                                                                                                                                                       |
| Complete List of Authors:     | <p>Taylor, Helen; Newcastle University, Population Health Sciences Institute Pennington, lindsay; Newcastle University, Population Health Sciences Institute; Newcastle Upon Tyne Hospitals NHS Foundation Trust, Great North Children's Hospital</p> <p>Morris, Christopher; University of Exeter Medical School, Peninsula Childhood Disability Research Unit (PenCRU), Institute of Health Research</p> <p>Craig, Dawn; Newcastle University, Population Health Sciences Institute</p> <p>McConachie, Helen; Newcastle University, Population Health Sciences Institute</p> <p>Cadwgan, Jill; Evelina London Children's Hospital, Paediatric Neurosciences</p> <p>Sellers, Diane; Sussex Community NHS Foundation Trust, Chailey Clinical Services</p> <p>Andrew, Morag; Newcastle Upon Tyne Hospitals NHS Foundation Trust, Great North Children's Hospital</p> <p>Smith, Johanna; Newcastle University, Patient and Public Involvement</p> <p>Garland, Deborah; National Autistic Society</p> <p>McColl, Elaine; Newcastle University, Population Health Sciences Institute</p> <p>Buswell, Charlotte; Newcastle Upon Tyne Hospitals NHS Foundation Trust, Great North Children's Hospital</p> <p>Thomas, Julian; Newcastle University, Population Health Sciences Institute; Newcastle Upon Tyne Hospitals NHS Foundation Trust, Great North Children's Hospital</p> <p>Colver, Allan; Newcastle University, Population Health Sciences Institute</p> <p>Parr, Jeremy ; Newcastle University, Population Health Sciences Institute; Newcastle Upon Tyne Hospitals NHS Foundation Trust, Great North Children's Hospital</p> |
| Keywords:                     | Neurodisability, Neurology, Therapeutics, Growth, Health services research                                                                                                                                                                                                                                                                                                                                                                                                                                                                                                                                                                                                                                                                                                                                                                                                                                                                                                                                                                                                                                                                                                                                                                                                                                                                                                                                                                                                                                                                                                                                                        |
|                               |                                                                                                                                                                                                                                                                                                                                                                                                                                                                                                                                                                                                                                                                                                                                                                                                                                                                                                                                                                                                                                                                                                                                                                                                                                                                                                                                                                                                                                                                                                                                                                                                                                   |

1  
2  
3  
4  
5  
6  
7  
8  
9  
10  
11  
12  
13  
14  
15  
16  
17  
18  
19  
20  
21  
22  
23  
24  
25  
26  
27  
28  
29  
30  
31  
32  
33  
34  
35  
36  
37  
38  
39  
40  
41  
42  
43  
44  
45  
46  
47  
48  
49  
50  
51  
52  
53  
54  
55  
56  
57  
58  
59  
60

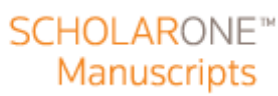

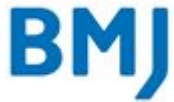

I, the Submitting Author has the right to grant and does grant on behalf of all authors of the Work (as defined in the below author licence), an exclusive licence and/or a non-exclusive licence for contributions from authors who are: i) UK Crown employees; ii) where BMJ has agreed a CC-BY licence shall apply, and/or iii) in accordance with the terms applicable for US Federal Government officers or employees acting as part of their official duties; on a worldwide, perpetual, irrevocable, royalty-free basis to BMJ Publishing Group Ltd ("BMJ") its licensees and where the relevant Journal is co-owned by BMJ to the co-owners of the Journal, to publish the Work in this journal and any other BMJ products and to exploit all rights, as set out in our [licence](#).

The Submitting Author accepts and understands that any supply made under these terms is made by BMJ to the Submitting Author unless you are acting as an employee on behalf of your employer or a postgraduate student of an affiliated institution which is paying any applicable article publishing charge ("APC") for Open Access articles. Where the Submitting Author wishes to make the Work available on an Open Access basis (and intends to pay the relevant APC), the terms of reuse of such Open Access shall be governed by a Creative Commons licence – details of these licences and which [Creative Commons](#) licence will apply to this Work are set out in our licence referred to above.

Other than as permitted in any relevant BMJ Author's Self Archiving Policies, I confirm this Work has not been accepted for publication elsewhere, is not being considered for publication elsewhere and does not duplicate material already published. I confirm all authors consent to publication of this Work and authorise the granting of this licence.

1  
2  
3 **Developing the FEEDS Toolkit of parent-delivered interventions for eating,**  
4 **drinking and swallowing difficulties in young children with neurodisability:**  
5 **Findings from a Delphi survey and stakeholder consultation workshops**  
6  
7  
8  
9

10  
11 Helen Taylor<sup>1</sup>, Lindsay Pennington<sup>1,2</sup>, Christopher Morris<sup>3</sup>, Dawn Craig<sup>1</sup>, Helen  
12 McConachie<sup>1</sup>, Jill Cadwgan<sup>4</sup>, Diane Sellers<sup>5</sup>, Morag Andrew<sup>2</sup>, Johanna Smith<sup>6</sup>,  
13 Deborah Garland<sup>7</sup>, Elaine McColl<sup>1</sup>, Charlotte Buswell<sup>2</sup>, Julian Thomas<sup>1,2</sup>, Allan  
14 Colver<sup>1</sup>, Jeremy Parr<sup>1,2</sup>.

15  
16  
17  
18  
19  
20 <sup>1</sup> Population Health Sciences Institute, Newcastle University, Newcastle upon Tyne,  
21 UK

22  
23 <sup>2</sup> Great North Children's Hospital, Newcastle upon Tyne Hospitals NHS Foundation  
24 Trust, Newcastle upon Tyne, UK

25  
26 <sup>3</sup> Peninsula Childhood Disability Research Unit (PenCRU), Institute of Health  
27 Research, University of Exeter Medical School, University of Exeter, Exeter, UK

28  
29 <sup>4</sup> Evelina London Children's Hospital, Guys and St Thomas' NHS Foundation Trust,  
30 King's Health Partners, London, UK

31  
32 <sup>5</sup> Sussex Community NHS Foundation Trust, Chailey Clinical Services, Sussex, UK

33  
34 <sup>6</sup> Patient and Public Involvement, Newcastle University, Newcastle upon Tyne, UK

35  
36 <sup>7</sup> National Autistic Society, London, UK

37  
38  
39  
40 Corresponding Author:

41  
42 Professor Jeremy R Parr

43  
44 Email: [Jeremy.Parr@ncl.ac.uk](mailto:Jeremy.Parr@ncl.ac.uk)

45  
46 Address: Population Health Sciences, Newcastle University, Level 3, Sir James  
47 Spence Institute, Royal Victoria Infirmary, Queen Victoria Road, Newcastle upon  
48 Tyne, NE1 4LP

49  
50  
51  
52 Word count: 2500/2500  
53  
54  
55  
56  
57  
58  
59  
60

## ABSTRACT

### Background

Young children with neurodisability commonly experience eating, drinking and swallowing difficulties (EDSD). Little is documented about which interventions and outcomes are most appropriate for such children. We aimed to seek consensus between parents of children with neurodisability and health professionals on the appropriate interventions and outcomes to inform future clinical developments and research studies.

### Methods

Two populations were sampled: parents of children aged up to 12 years with neurodisability who experienced EDSD; health professionals working with children and young people (aged 0-18 years) with neurodisability with experience of EDSD. Participants had taken part in a previous national survey and were invited to take part in a Delphi survey and / or consultation workshops. Two rounds of this Delphi survey sought agreement on the appropriate interventions and outcomes for use with children with neurodisability and EDSD. Two stakeholder consultation workshops were iterative, with the findings of the first discussed at the second, and conclusions reached.

### Results

Parents and health professionals viewed 19 interventions and 10 outcomes as essential. Interventions related to improvement in the physical aspects of a child's EDSD, behavioural changes of the child or parent, and changes in the child or family's well-being. Both parents and health professionals supported a 'toolkit' of interventions that they could use together in shared decision making to prioritise and implement timely interventions appropriate to the child.

### Conclusions

This study identified interventions viewed as essential to consider for improving EDSD in children with neurodisability. It also identified several key outcomes that are valued by parents and health professionals. The FEEDS Toolkit of

1  
2  
3 interventions to improve EDSD in children with neurodisability has been developed  
4 and now requires evaluation regarding its use and effectiveness.  
5  
6  
7  
8  
9  
10  
11  
12  
13  
14  
15  
16  
17  
18  
19  
20  
21  
22  
23  
24  
25  
26  
27  
28  
29  
30  
31  
32  
33  
34  
35  
36  
37  
38  
39  
40  
41  
42  
43  
44  
45  
46  
47  
48  
49  
50  
51  
52  
53  
54  
55  
56  
57  
58  
59  
60

Confidential: For Review Only

#### What is known about the subject?

- Children with neurodisability commonly experience eating, drinking and swallowing difficulties (EDSD) that have physical and non-physical causes.
- EDSD have a considerable impact on a child and family.
- A UK survey found a wide range of parent-delivered interventions are recommended by health professionals and used by parents to support young children with neurodisability.

#### What this study adds?

- Agreement from parents and health professionals on the appropriate interventions and outcomes for use with children with neurodisability and EDSD.
- Clarity on the interventions and outcomes to focus on within future research
- A toolkit of interventions was developed for use by health professionals and parents to support children with neurodisability and EDSD.

## INTRODUCTION

Children with neurodisability commonly experience eating, drinking and swallowing difficulties (EDSD) that have physical and non-physical causes. Physical causes relate to decreased muscle control and co-ordination, which impairs the safety and efficiency of sucking, chewing and swallowing. Non-physical causes include rigidity or rituals associated with food or mealtimes, and sensory sensitivities to certain textures or flavours. Physical and non-physical EDSD frequently co-exist (mixed EDSD). EDSD make mealtimes stressful for children and their families and impact negatively on quality of life and social participation. They also lead to inadequate calorie intake or a restricted diet, affecting a child's nutrition, growth and physical health (1).

A recent UK survey of parents and health professionals found a wide range of interventions were used for children with neurodisability who experience EDSD to



1  
2  
3 address their physiological and behavioural needs (2). The survey found most  
4 children received multiple interventions. There was a common approach to  
5 addressing ESDS regardless of the cause of the child's difficulties, with the majority  
6 of interventions being used to address all types of ESDS. This survey also identified  
7 a range of important outcomes to measure the effectiveness of interventions.  
8  
9

10  
11  
12 As part of a larger research programme, FEEDS (Focus on Early Eating,  
13 Drinking and Swallowing) (3), this study aimed to:  
14

15  
16 1. Seek consensus between parents and health professionals on which  
17 interventions and outcomes are most appropriate for children with neurodisability  
18 and ESDS.  
19

20  
21 2. Gain consensus between parents and health professionals on which  
22 interventions should be evaluated in future research.  
23

24  
25 3. Develop a 'toolkit' of interventions that could be used by health  
26 professionals and parents to support children with ESDS and their families.  
27  
28  
29  
30  
31  
32

## 33 **METHODS**

34  
35 An iterative online Delphi survey and two stakeholder consultation workshops  
36 were undertaken.  
37  
38  
39  
40

### 41 **Delphi survey**

#### 42 **Participants**

43  
44  
45 Invitations to participate were sent to respondents from the FEEDS national  
46 survey (2) who had expressed interest in subsequent research stages. This included:  
47 parents of children (aged up to 12 years) with neurodisability who experienced  
48 ESDS; and health professionals working with children and young people (aged 0-18  
49 years) with neurodisability.  
50  
51  
52  
53  
54  
55  
56  
57

#### 58 **Measure**

1  
2  
3 The questionnaire listed interventions and outcomes identified in earlier  
4 stages of the FEEDS research programme (3). The questionnaire's structure and  
5 format was developed with reference to methodological recommendations (4) and  
6 previous experience of Delphi surveys. The questionnaire contained three sections  
7 [1] demographic characteristics; [2] parent-delivered interventions for young children  
8 with neurodisability and EDSD; and [3] outcomes to measure improvement in EDSD.  
9

10  
11  
12  
13  
14 Questions related to 25 interventions and 22 outcomes (Tables 1 and 2).  
15 Respondents rated the importance of the interventions as part of a treatment  
16 package for EDSD, and the outcomes to measure (using a 9-point scale: 0-3 'not  
17 important', 4-6 'important but not essential', 7-9 'essential'). Respondents could tick  
18 "unable to score". The questionnaire was hosted on Qualtrics (5).  
19  
20  
21  
22  
23  
24  
25  
26  
27  
28  
29  
30  
31  
32  
33  
34  
35  
36  
37  
38  
39  
40  
41  
42  
43  
44  
45  
46  
47  
48  
49  
50  
51  
52  
53  
54  
55  
56  
57  
58  
59  
60

**Table 1. Description of interventions presented in Delphi Survey**

| Intervention                    | Description                                                                                                                                                                                                       |
|---------------------------------|-------------------------------------------------------------------------------------------------------------------------------------------------------------------------------------------------------------------|
| Modifying environment           | Changing the physical or social setting at mealtimes (e.g. reducing distractions such as levels of noise; using distractions to reduce a child's attention on their food)                                         |
| Positioning                     | Ensuring a child is in the best position to eat and drink food safely and efficiently (e.g. a child sitting upright providing support for head control)                                                           |
| Modifying equipment             | Using different spoons, forks, plates, cups, or bottles (e.g. doidy cup; plastic spoon)                                                                                                                           |
| Scheduling of meals             | Setting the timing of mealtimes to encourage a child's appetite and establish a mealtime routine (e.g. spreading meals / snacks throughout the day; setting a 30 minutes limit for mealtimes)                     |
| Modifying consistency of food   | Changing the consistency of the child's food or drink (e.g. pureeing food; thickening food or drink)                                                                                                              |
| Modifying other aspects of food | Changing the temperature, taste, amount or presentation of the child's food or drink (e.g. presenting different foods so they do not touch each other; mixing liked foods with disliked foods)                    |
| Modifying placement of food     | Changing where food is placed in a child's mouth to help chewing or swallowing (e.g. placing food to the side of the mouth)                                                                                       |
| Enhancing communication         | Improving communication between a child and the person feeding them during mealtimes (e.g. offering choices of food to a child; a child using eye pointing or signs or symbols to ask for specific food or drink) |
| Visual supports                 | Use of pictures, a 'countdown clock', or social stories to increase a child's understanding of what happens during mealtimes (e.g. showing a child pictures of what                                               |

|                                          |                                                                                                                                                                                                                                                                                                                          |
|------------------------------------------|--------------------------------------------------------------------------------------------------------------------------------------------------------------------------------------------------------------------------------------------------------------------------------------------------------------------------|
|                                          | food will be on their plate; showing a child a story to explain what will happen during a mealtime)                                                                                                                                                                                                                      |
| Responding to a child's cues for feeding | Helping people to recognise the signs that a child is ready to take another mouthful of food or drink (e.g. looking for breath alterations or repeated swallows from a child to indicate a lack of readiness)                                                                                                            |
| Pace of feeding                          | Changing the speed at which each mouthful of food or drink is taken by a child (e.g. slowing pace down to prevent overfilling of a child's mouth)                                                                                                                                                                        |
| Medication                               | Any medication (e.g. for epilepsy, pain, drooling, tone, gastroesophageal reflux)                                                                                                                                                                                                                                        |
| Energy supplements                       | Any energy or calorie supplement given orally or via feeding tube                                                                                                                                                                                                                                                        |
| Vitamin or nutritional supplements       | Any supplements given or changes to a child's diet to increase the vitamins or nutrients in their diet                                                                                                                                                                                                                   |
| Physical support                         | Giving direct physical support to a child when eating or drinking to improve the movements needed to bite, chew and swallow (e.g. placing a thumb underneath the chin to help a child close their mouth)                                                                                                                 |
| Oral and sensory desensitisation         | Activities aimed at reducing a child's adverse reactions to different sensory experiences linked to eating and drinking (e.g. face massage; chewing no-food items such as a chewy 'toothbrush')                                                                                                                          |
| Oral-motor exercises                     | Exercises done with a child to improve the control of their mouth, jaw, tongue or lips (e.g. a child moving a non-food item with their tongue; a child sucking through a straw)                                                                                                                                          |
| Graded exposure to new food              | Activities aimed at gradually exposing a child to new or disliked foods and drinks (e.g. messy play activities involving a child touching new or disliked foods; using small steps towards a child accepting new or disliked foods such as licking the food or putting it in their mouth with no expectation to swallow) |

|                                    |                                                                                                                                                                                                                                                                                                                       |
|------------------------------------|-----------------------------------------------------------------------------------------------------------------------------------------------------------------------------------------------------------------------------------------------------------------------------------------------------------------------|
| Graded exposure to new textures    | Activities aimed at gradually introducing a child to more challenging food textures and fluid consistencies (e.g. messy play activities involving a child touching new or disliked textures; using small steps to introduce a child to lumpy food or foods that require chewing)                                      |
| Changing behaviour at mealtimes    | Strategies to encourage a child to behave appropriately at mealtimes (e.g. a child sitting down ready to eat; a child staying seated for the meal)                                                                                                                                                                    |
| Modelling                          | Giving a child the opportunity to learn from others by eating and drinking with them (e.g. sitting a child with other children or family members at mealtimes)                                                                                                                                                        |
| Training to self-feed              | Teaching a child to feed themselves (e.g. placing a hand over a child's hand to help guide the food into their mouth)                                                                                                                                                                                                 |
| Support for parents                | Help for parents around their child's eating and drinking difficulties (e.g. counselling; parent support groups)                                                                                                                                                                                                      |
| Sharing information                | Any information shared to help parents and professional understand a child's difficulties with eating and drinking (e.g. professionals teaching parents and school staff about a child's physical or sensory difficulties; parents helping professionals understand what's important about mealtimes in their family) |
| Psychological support for children | Psychological help for a child (e.g. counselling)                                                                                                                                                                                                                                                                     |

**Table 2. Description of outcomes presented in Delphi Survey**

| Outcome                                      | Description                                                                               |
|----------------------------------------------|-------------------------------------------------------------------------------------------|
| General health                               | A child's overall health                                                                  |
| Weight                                       | How much a child weighs                                                                   |
| Height                                       | How tall a child is                                                                       |
| Growth                                       | A change in a child's growth, including height and weight                                 |
| Nutrition                                    | A child's level of energy and nutrients for healthy growth                                |
| Child's enjoyment of mealtimes               |                                                                                           |
| Parent or caregiver's enjoyment of mealtimes |                                                                                           |
| Quality of life of child                     | How satisfied a child feels about their life                                              |
| Quality of life of family                    | How satisfied other family members feel about their (own) lives                           |
| Mental health of parent or caregiver         | A parent / caregiver's mood and emotional wellbeing                                       |
| Safety                                       | A child's ability to eat and drink safely without choking or aspirating                   |
| Oral motor control                           | A child's ability to control the movement of their mouth, jaw, tongue or lips and swallow |
| Efficiency                                   | A child's ability to eat and drink at a reasonable pace                                   |
| Independence                                 | A child's ability to feed themselves                                                      |
| Variety                                      | The range of foods or liquids a child eats or drinks                                      |
| Amount                                       | The amount of food or liquid a child eats or drinks per day                               |
| Appetite                                     | A child's level of hunger and desire for food / drink                                     |
| Mealtime behaviour                           | A child behaving appropriately during meals                                               |
| Mealtime interaction                         | The interaction between a child and the person feeding them at mealtimes                  |
| Social participation                         | A child's overall involvement at mealtimes                                                |

|                                     |                                                                                    |
|-------------------------------------|------------------------------------------------------------------------------------|
| Child's understanding               | A child's understanding of mealtime activities and routines                        |
| Parent or caregiver's understanding | A parent / caregiver's insight into their child's eating and drinking difficulties |

Confidential: For Review Only

1  
2  
3  
4  
5  
6  
7  
8  
9  
10  
11  
12  
13  
14  
15  
16  
17  
18  
19  
20  
21  
22  
23  
24  
25  
26  
27  
28  
29  
30  
31  
32  
33  
34  
35  
36  
37  
38  
39  
40  
41  
42  
43  
44  
45  
46

## Patient and public involvement

The questionnaire and information sheet were developed by the research team, which included parent co-investigators, in consultation with the Parent Advisory Group (PAG) and following focus groups with parents and health professionals (3).

## Procedure

The same questionnaire was sent to parents and health professionals in two rounds. In round one, respondents rated the importance of individual intervention categories, and outcomes. In round two, respondents were shown bar charts of parent and health professionals' ratings from round one and then re-rated the importance of each intervention and outcome. No items were removed between rounds. Both survey rounds were open for three weeks with a week between rounds for data analysis (March-May 2019). Respondents and non-respondents from round one were invited to take part in round two, to maximise participation. Round two respondents entered a prize draw to win one of five £100 vouchers for each stakeholder group.

## Analysis

Consensus was conservatively defined as  $\geq 67\%$  and required each stakeholder group to rate an intervention or outcome as essential (rated 7-9 at round two) (4).

## Stakeholder workshops

## Participants

Parents who took part in the FEEDS national survey (2) and had expressed interest in subsequent research stages were invited to participate. Invitations were sent to health professionals linked to regional and national clinical networks.



1  
2  
3 Participants were purposively selected to maximise variation in their experience of  
4 EDSD and service provision.  
5  
6  
7  
8

## 9 Design

10  
11  
12 Two half-day workshops were held (Newcastle upon Tyne and London) in  
13 May 2019. The workshops aimed to facilitate detailed discussion on [1] Which  
14 interventions and outcomes should be evaluated in future research?; [2] A proposed  
15 intervention 'toolkit' for EDSD (developed during previous study stages), including:  
16 How could the essential interventions identified in the Delphi survey be presented to  
17 parents as a list of treatment options?; What level of detail would parents need on  
18 each intervention?; How would a menu of treatment options be individualised?; What  
19 level of support would families need from health professionals to use the toolkit?  
20  
21  
22  
23  
24  
25  
26  
27  
28

## 29 Patient and public involvement

30  
31 Parent co-investigators were involved in the design and delivery of the  
32 workshops. The PAG also reviewed workshop materials and commented on the  
33 structure and timings of tasks.  
34  
35  
36  
37  
38  
39

## 40 Procedure

41  
42 Attendees were presented with a study overview including the main findings  
43 from earlier research stages. Individual topics were discussed in small mixed groups  
44 of parents and professionals. One research team member facilitated each group  
45 and notes were taken. The workshops were iterative, with the results of the first  
46 workshop being presented at the second. To thank them for their time and/or cover  
47 travel costs, parents and professionals received a shopping voucher.  
48  
49  
50  
51  
52

53 Notes from the workshop discussions were reviewed and key themes  
54 identified; themes were then discussed by the research team.  
55  
56  
57  
58  
59  
60

## RESULTS

### Delphi survey

196 parents and 175 health professionals were invited (see Figure 1). 81 parents (41%) and 61 parents (31%) responded to rounds one and two respectively, with 52 parents responding to both rounds. 76 health professionals (43%) and 61 health professionals (35%) responded to rounds one and two respectively, with 51 health professionals responding to both rounds.

[Insert figure 1 about here]

### Participant Characteristics

The characteristics of respondents are shown in Table 3. Similar proportions of parents and health professionals participated in round one (49% and 51% respectively), and round two (50% and 50% respectively). The characteristics of respondents who completed both rounds and those who completed round two only were very similar. See Supplementary Tables 1 and 2 for full details of respondents and non-respondents.

**Table 3. Characteristics of Delphi Survey respondents for Rounds 1 and 2**

|                          | Round 1<br>N=158         |                      | Round 2<br>N=123         |                      |
|--------------------------|--------------------------|----------------------|--------------------------|----------------------|
|                          | Parents<br>N=81<br>n (%) | HPs<br>N=76<br>n (%) | Parents<br>N=61<br>n (%) | HPs<br>N=61<br>n (%) |
| Age (no missing data)    |                          |                      |                          |                      |
| Under 20 years           | 0 (0)                    | 0 (0)                | 0 (0)                    | 0 (0)                |
| 21-30 years              | 2 (3)                    | 8 (11)               | 2 (3)                    | 3 (5)                |
| 31-40 years              | 32 (40)                  | 19 (25)              | 23 (38)                  | 17 (28)              |
| 41-50 years              | 40 (49)                  | 25 (33)              | 32 (53)                  | 20 (33)              |
| 51-60 years              | 7 (9)                    | 22 (29)              | 4 (7)                    | 20 (33)              |
| 61 years and over        | 0 (0)                    | 2 (3)                | 0 (0)                    | 1 (2)                |
| Gender (no missing data) |                          |                      |                          |                      |

|                                             |         |         |         |         |
|---------------------------------------------|---------|---------|---------|---------|
| Female                                      | 76 (94) | 71 (93) | 58 (95) | 58 (95) |
| Male                                        | 5 (6)   | 4 (5)   | 3 (5)   | 3 (5)   |
| Prefer not to say                           | 0 (0)   | 1 (1)   | 0 (0)   | 0 (0)   |
| <b>Location</b>                             |         |         |         |         |
| England                                     |         |         |         |         |
| North East                                  | 14 (17) | 5 (7)   | 11 (18) | 7 (12)  |
| North West                                  | 8 (10)  | 3 (4)   | 6 (10)  | 3 (5)   |
| Yorkshire and Humber                        | 5 (6)   | 10 (13) | 2 (3)   | 9 (15)  |
| Midlands                                    | 11 (14) | 16 (21) | 9 (14)  | 10 (16) |
| South East including London                 | 27 (33) | 26 (34) | 20 (33) | 21 (34) |
| South West                                  | 8 (10)  | 8 (11)  | 7 (12)  | 4 (7)   |
| Scotland                                    | 3 (4)   | 4 (5)   | 2 (3)   | 5 (8)   |
| Northern Ireland                            | 2 (3)   | 0 (0)   | 2 (3)   | 0 (0)   |
| Wales                                       | 1 (1)   | 4 (5)   | 1 (2)   | 2 (3)   |
| Missing                                     | 2 (3)   | 0 (0)   | 1 (2)   | 0 (0)   |
| <b>Ethnicity (no missing data)</b>          |         |         |         |         |
| White                                       | 78 (96) | 70 (92) | 59 (97) | 55 (90) |
| Asian / Asian British                       | 2 (3)   | 3 (4)   | 0 (0)   | 4 (7)   |
| Black / African / Caribbean / Black British | 0 (0)   | 0 (0)   | 1 (2)   | 0 (0)   |
| Mixed / Multiple ethnic group               | 1 (1)   | 1 (1)   | 1 (2)   | 1 (2)   |
| Other ethnic group                          | 0 (0)   | 2 (3)   | 0 (0)   | 1 (2)   |
| Prefer not to say                           | 0 (0)   | 0 (0)   | 0 (0)   | 0 (0)   |
| <b>Nature of child's EDSD</b>               |         |         |         |         |
| Physical EDSD                               | 14 (17) | 14 (18) | 9 (15)  | 13 (21) |
| Nonphysical EDSD                            | 40 (49) | 5 (7)   | 32 (53) | 3 (5)   |
| Mixed EDSD                                  | 27 (33) | 57 (75) | 20 (33) | 45 (74) |
| Missing                                     | 0 (0)   | 0 (0)   | 0 (0)   | 0 (0)   |

### Interventions for children with neurodisability and EDSD

Table 4 shows the proportion of parents and health professionals who rated interventions as essential in rounds one and two. Consensus was achieved for 17/25 interventions at round one, increasing to 19/25 interventions at round two. The interventions rated as an essential part of an intervention package for young children with neurodisability and EDSD are shown in Table 4. See Supplementary Tables 3 and 4 for all intervention ratings.

#### **Table 4. Parents' and health professionals' rating of interventions as essential on Round 1 and 2 of the Delphi Survey**

Bold denotes a rating of 'essential' (score 7-9) by  $\geq 67\%$  within the stakeholder group. Shaded cell denotes agreement by both stakeholder groups that the item was 'essential' (score 7-9)  $\geq 67\%$ .

|  | Round 1 | Round 2 |
|--|---------|---------|
|--|---------|---------|

| Intervention                             | Parents     | Health professionals | Parents     | Health professionals |
|------------------------------------------|-------------|----------------------|-------------|----------------------|
|                                          | N = 81<br>% | N = 76<br>%          | N = 61<br>% | N = 61<br>%          |
| Modifying environment                    | <b>67</b>   | <b>87</b>            | <b>77</b>   | <b>95</b>            |
| Positioning                              | <b>92</b>   | <b>97</b>            | <b>96</b>   | <b>100</b>           |
| Modifying equipment                      | <b>76</b>   | <b>87</b>            | <b>93</b>   | <b>90</b>            |
| Scheduling of meals                      | 53          | <b>82</b>            | 50          | <b>83</b>            |
| Modifying consistency of food or drink   | <b>79</b>   | <b>86</b>            | <b>79</b>   | <b>96</b>            |
| Modifying other aspects of food or drink | <b>74</b>   | <b>75</b>            | <b>86</b>   | <b>83</b>            |
| Modifying placement of food              | <b>68</b>   | <b>79</b>            | <b>75</b>   | <b>90</b>            |
| Enhancing communication                  | <b>76</b>   | <b>82</b>            | <b>86</b>   | <b>90</b>            |
| Visual supports                          | 52          | 63                   | 52          | <b>72</b>            |
| Responding to a child's cues for feeding | <b>83</b>   | <b>94</b>            | <b>93</b>   | <b>96</b>            |
| Pace of feeding                          | <b>77</b>   | <b>96</b>            | <b>89</b>   | <b>100</b>           |
| Physical support                         | <b>72</b>   | <b>69</b>            | <b>82</b>   | <b>81</b>            |
| Oral and sensory desensitisation         | <b>72</b>   | <b>68</b>            | <b>82</b>   | <b>75</b>            |
| Oral-motor exercises                     | <b>73</b>   | 40                   | <b>70</b>   | 35                   |
| Graded exposure to new food              | 66          | <b>85</b>            | <b>70</b>   | <b>84</b>            |
| Graded exposure to new textures          | <b>68</b>   | <b>81</b>            | <b>76</b>   | <b>81</b>            |
| Changing behaviour at mealtimes          | 57          | 63                   | 58          | 56                   |
| Modelling                                | <b>80</b>   | <b>82</b>            | <b>77</b>   | <b>83</b>            |
| Training to self-feed                    | <b>68</b>   | 47                   | 55          | 46                   |
| Support for parents                      | <b>81</b>   | <b>84</b>            | <b>95</b>   | <b>96</b>            |
| Psychological support for child          | <b>72</b>   | 63                   | <b>77</b>   | 59                   |
| Medication                               | <b>78</b>   | <b>86</b>            | <b>87</b>   | <b>91</b>            |
| Energy supplements                       | 62          | <b>74</b>            | <b>69</b>   | <b>73</b>            |
| Sharing information                      | <b>90</b>   | <b>95</b>            | <b>100</b>  | <b>97</b>            |
| Vitamin or nutritional supplements       | <b>68</b>   | <b>68</b>            | <b>85</b>   | <b>75</b>            |

### Outcomes for children with neurodisability and EDSD

Table 5 shows the proportions of parents and health professionals who rated outcomes as essential in rounds one and two. The outcomes for which there was consensus on did not change between rounds. 10 outcomes were viewed as essential; some related to physical health, such as safety and growth, and others to

the International Classification of Functioning Disability and Health, such as child social participation. See Supplementary Tables 5 and 6 for all outcome ratings.

**Table 5. Parents' and health professionals' agreement on outcomes rated as essential on Round 1 and Round 2 of the Delphi Survey**

Bold denotes a rating of 'essential' (score 7-9) by  $\geq 67\%$  within the stakeholder group. Shaded cell denotes agreement by both stakeholder groups that the item was 'essential' (score 7-9)  $\geq 67\%$ .

| Outcome                                | Round 1           |                                 | Round 2         |                                 |
|----------------------------------------|-------------------|---------------------------------|-----------------|---------------------------------|
|                                        | Parents<br>N = 81 | Health<br>professionals<br>N=76 | Parents<br>N=61 | Health<br>professionals<br>N=61 |
| Nutrition                              | <b>89</b>         | <b>97</b>                       | <b>95</b>       | <b>98</b>                       |
| General Health                         | <b>89</b>         | <b>93</b>                       | <b>97</b>       | <b>98</b>                       |
| Weight                                 | 53                | 51                              | 34              | 48                              |
| Height                                 | 31                | 32                              | 12              | 12                              |
| Growth                                 | <b>75</b>         | <b>76</b>                       | <b>82</b>       | <b>89</b>                       |
| Child's enjoyment of mealtimes         | <b>83</b>         | <b>91</b>                       | <b>90</b>       | <b>98</b>                       |
| Parent's enjoyment of mealtimes        | 42                | <b>76</b>                       | 39              | <b>78</b>                       |
| Quality of life of child               | <b>95</b>         | <b>92</b>                       | <b>98</b>       | <b>100</b>                      |
| Quality of life of family              | <b>78</b>         | <b>87</b>                       | <b>90</b>       | <b>97</b>                       |
| Mental health of parent                | <b>83</b>         | <b>84</b>                       | <b>93</b>       | <b>97</b>                       |
| Safety                                 | <b>97</b>         | <b>97</b>                       | <b>100</b>      | <b>100</b>                      |
| Oral-motor control                     | <b>87</b>         | <b>74</b>                       | <b>86</b>       | <b>72</b>                       |
| Efficiency                             | 44                | 60                              | 17              | 46                              |
| Independence                           | 60                | 31                              | 43              | 28                              |
| Variety                                | 51                | 23                              | 26              | 12                              |
| Amount                                 | 62                | 40                              | 53              | 25                              |
| Appetite                               | 59                | 44                              | 46              | 38                              |
| Mealtime behaviour                     | 41                | 30                              | 34              | 26                              |
| Mealtime Interaction                   | 61                | <b>81</b>                       | 65              | <b>79</b>                       |
| Social participation                   | 50                | <b>77</b>                       | 53              | <b>74</b>                       |
| Parent's understanding of child's EDSD | <b>89</b>         | <b>89</b>                       | <b>95</b>       | <b>93</b>                       |
| Child's understanding of mealtimes     | 51                | 51                              | 58              | 40                              |

### Stakeholder Workshops

15 parents and 19 health professionals took part in the workshops.

## Participant Characteristics

Nine parents had children with physical EDSD, two had children with non-physical EDSD, two had children with mixed EDSD, and two had one child with physical EDSD and one child with non-physical EDSD. Health professionals comprised six speech and language therapists, four dietitians, four paediatricians, three occupational therapists, two clinical psychologists, a physiotherapist, and a nurse.

## Interventions and outcomes for evaluation in future research

Parents and health professionals agreed that no single intervention was suitable for all children with EDSD as many children require a number of interventions concurrently or sequentially. Both parents and health professionals endorsed the idea of an intervention 'toolkit' that could be used together to identify the most appropriate interventions for individual children and their families. They thought the toolkit should be visually represented and be available as a digital and hard copy with interactive properties to support communication between parents and professionals. They emphasised the need for flexibility in the toolkit to allow families and health professionals to select the most appropriate interventions, at the right time. Some parents thought they would want to be able to see the whole toolkit, to facilitate a central parental role in intervention prioritisation. Parents and health professionals thought that detailed information was needed for each intervention to fully inform families and allow them to share in decision-making.

Participants thought a lead health professional (such as a speech and language therapist) and multidisciplinary team should support families in their toolkit use. The nature of support needed would vary between families and may include psychological input. Parents and health professionals raised a number of practical issues about toolkit use, including: how to deliver the toolkit to meet the needs of a heterogeneous population with diverse EDSD; how to deliver the toolkit where multidisciplinary EDSD team professionals are unavailable or under-resourced; and how to deliver the toolkit to children with non-physical EDSD who may not currently receive multidisciplinary team healthcare.

## Toolkit of interventions for children with neurodisability and EDS

Using the findings from the Delphi survey and workshops, alongside findings from other stages of the FEEDS research programme (3), we developed the FEEDS Toolkit of interventions for use by health professionals and parents to support children with neurodisability and EDS (see Figure 2). The FEEDS Toolkit comprises 19 EDS interventions: 15 for use with children with all types of EDS, two for use with children with physical or mixed EDS only and two that are rarely offered by the UK NHS (oral motor exercises and psychological support for the child). The FEEDS Toolkit also includes ongoing interventions that influence EDS strategies such as individual context, medical issues and sharing information.

[Insert figure 2 about here]

## DISCUSSION

The Delphi survey established consensus on the 19 essential interventions to include in the FEEDS Toolkit, and 10 outcomes of importance. The stakeholder workshops showed support from parents and health professionals for the FEEDS Toolkit that could be worked through by health professionals and parents.

The large number and diversity of interventions identified as essential for inclusion in the toolkit reflects the heterogeneity of children with neurodisability and EDS, and their families. Beresford et al (6) found health professionals working with children with neurodisability had a “great big menu of interventions to choose from” which were highly individualised. Health professionals talked about taking an eclectic approach and using a range of interventions from their toolbox with children with neurodisability and their families; key factors affecting decision making regarding appropriate interventions included child and family’s characteristics and resources (6). McAnuff et al (7) described a prototype for an interactive toolkit to support families and health professionals to identify opportunities for change, and to

1  
2  
3 jointly select appropriate interventions. This is in keeping with views regarding how  
4 the FEEDS toolkit might be operationalised.

5  
6  
7

### 8 9 **Strengths and limitations**

10  
11 We acknowledge the potential risks of sampling and response bias.  
12 Participants from the FEEDS national survey were recruited from wide ranging  
13 sources (3); their data allowed comparison of the characteristics of Delphi survey  
14 respondents and non-respondents. The overall response ( $\approx 40\%$ ) was acceptable.  
15  
16 There was minimal difference between the characteristics of respondents between  
17 rounds one and two. Through contacting non-respondents from round one in round  
18 two we increased round two responses thereby improving precision. We used a  
19 conservative consensus definition of  $\geq 67\%$ ; our findings may have differed if we had  
20 used different consensus definitions.  
21  
22  
23  
24  
25  
26  
27

28 The workshops had representation from two diverse geographical areas and  
29 parents and professionals with a broad range of EDSD experiences. The iterative  
30 nature of the workshops facilitated detailed discussions. Young people with EDSD  
31 were not invited to the workshops; however, at separate young people's focus  
32 groups, they agreed the importance of the outcomes identified (3).  
33  
34  
35  
36  
37  
38  
39

### 40 **Conclusions**

41  
42 The FEEDS Delphi survey and workshops identified the interventions  
43 essential to consider for improving EDSD in children with neurodisability. They also  
44 identified the most important outcomes to measure, focusing on both the child and  
45 the wider family. These findings, alongside findings from earlier stages of the  
46 FEEDS research programme (3) have been used to develop a toolkit of  
47 interventions. The FEEDS Toolkit requires evaluation of its feasibility and  
48 acceptability, and its effectiveness for improving outcomes for children and families.  
49  
50  
51  
52  
53  
54  
55  
56

57 Contributors: JP was Chief Investigator, co-led the design and delivery of the study,  
58 supervised the Delphi survey data analysis, co-led the consultation workshops and  
59



1  
2  
3 analysed the data. LP co-led the design and delivery of the project, co-led the  
4 consultation workshops and analysed the data. HT developed the Delphi survey  
5 materials, ran the Delphi survey and analysed the data, and co-led the consultation  
6 workshops. CM, JC, DS, JS, DG, JT and EM contributed to the design of the Delphi  
7 survey. CB, AC, DG, CM, HM, JS, JT, JC and DS co-facilitated the consultation  
8 workshops. All authors contributed to the study design, interpretation of results,  
9 writing of the manuscript, and reviewed and approved the final version.  
10  
11  
12  
13  
14  
15  
16  
17

18 Acknowledgements: We are grateful to all the participants who gave their time to  
19 complete the Delphi survey and workshops. The Sponsor for the studies was  
20 Newcastle upon Tyne Hospitals NHS Foundation Trust.  
21  
22  
23  
24  
25

26 Funding: This study was funded by the National Institute of Health Research (NIHR)  
27 Health Technology Assessment Programme (ref: 15/156/02). The views expressed  
28 are those of the author(s) and not necessarily those of the NIHR or the Department  
29 of Health and Social Care.  
30  
31  
32  
33

34 The NIHR HTA report from the research (including that reported in this manuscript)  
35 can be found at: <https://www.journalslibrary.nihr.ac.uk/hta/hta25220/#/full-report>  
36  
37  
38  
39  
40

41 Competing interests: Diane Sellers received a research grant from Nutricia  
42 Advanced Medical Nutrition UK (Wiltshire, UK) from 2017 to 2018, honorarium  
43 payments from Nutricia Advanced Medical Nutrition UK from 2015 to 2019 and an  
44 honorarium payment from Nutricia Advanced Medical Nutrition UK in 2018. Morag  
45 Andrew received fees from Nutricia Advanced Medical Nutrition UK to attend a  
46 conference in which she was presenting industry partner research work and lecture  
47 fees/symposium presentation fees from Nutricia Advanced Medical Nutrition UK and  
48 Nestlé SA (Vevey, Switzerland). Jill Cadwgan reports personal fees from Novartis  
49 Pharmaceuticals (Basel, Switzerland) and Allergan, and Ispen Pharmaceuticals  
50 (Paris, France).  
51  
52  
53  
54  
55  
56  
57  
58  
59  
60

1  
2  
3 Patient consent for publication: Not required  
4  
5  
6

7 Ethics approval: This study was approved by The West Midlands and the Black  
8 Country Research Ethics Committee (17/WM/0439). Completion of the Delphi  
9 survey was taken as informed consent and informed consent was taken at the start  
10 of the stakeholder workshops.  
11  
12  
13  
14

15  
16 Data availability statement: Data that support the findings of this study are available  
17 on request from the corresponding author [JP].  
18  
19  
20  
21  
22  
23  
24  
25  
26  
27  
28  
29  
30  
31  
32  
33  
34  
35  
36  
37  
38  
39  
40  
41  
42  
43  
44  
45  
46  
47  
48  
49  
50  
51  
52  
53  
54  
55  
56  
57  
58  
59  
60

## References

1. Sullivan PB, Andersen GL, Andrew MJ. Nutrition in neurodisability. London: Mac Keith Press; 2020.
2. Taylor H, Pennington L, Craig D, et al. Children with neurodisability and feeding difficulties: a UK survey of parent-delivered interventions. *BMJ Paediatrics Open*. 2021;5(1):e001095.
3. Parr J, Pennington L, Taylor H, et al. Parent-delivered interventions used at home to improve eating, drinking and swallowing in children with neurodisability: the FEEDS mixed-methods study. 2021;25:22.
4. Sinha IP, Smyth RL, Williamson PR. Using the Delphi technique to determine which outcomes to measure in clinical trials: recommendations for the future based on a systematic review of existing studies. *PLoS medicine*. 2011;8(1):e1000393.
5. Qualtrics. Qualtrics. Utah, USA: Provo; 2005.
6. Beresford B, Clarke S, Maddison J. Therapy interventions for children with neurodisabilities: a qualitative scoping study. *Health Technol Assess*. 2018;22(3):1-150.
7. McAnuff J, Brooks R, Duff C, et al. Improving participation outcomes and interventions in neurodisability: co-designing future research. *Child: care, health and development*. 2017;43(2):298-306.

Figure 1. Flow diagram of Delphi Survey recruitment

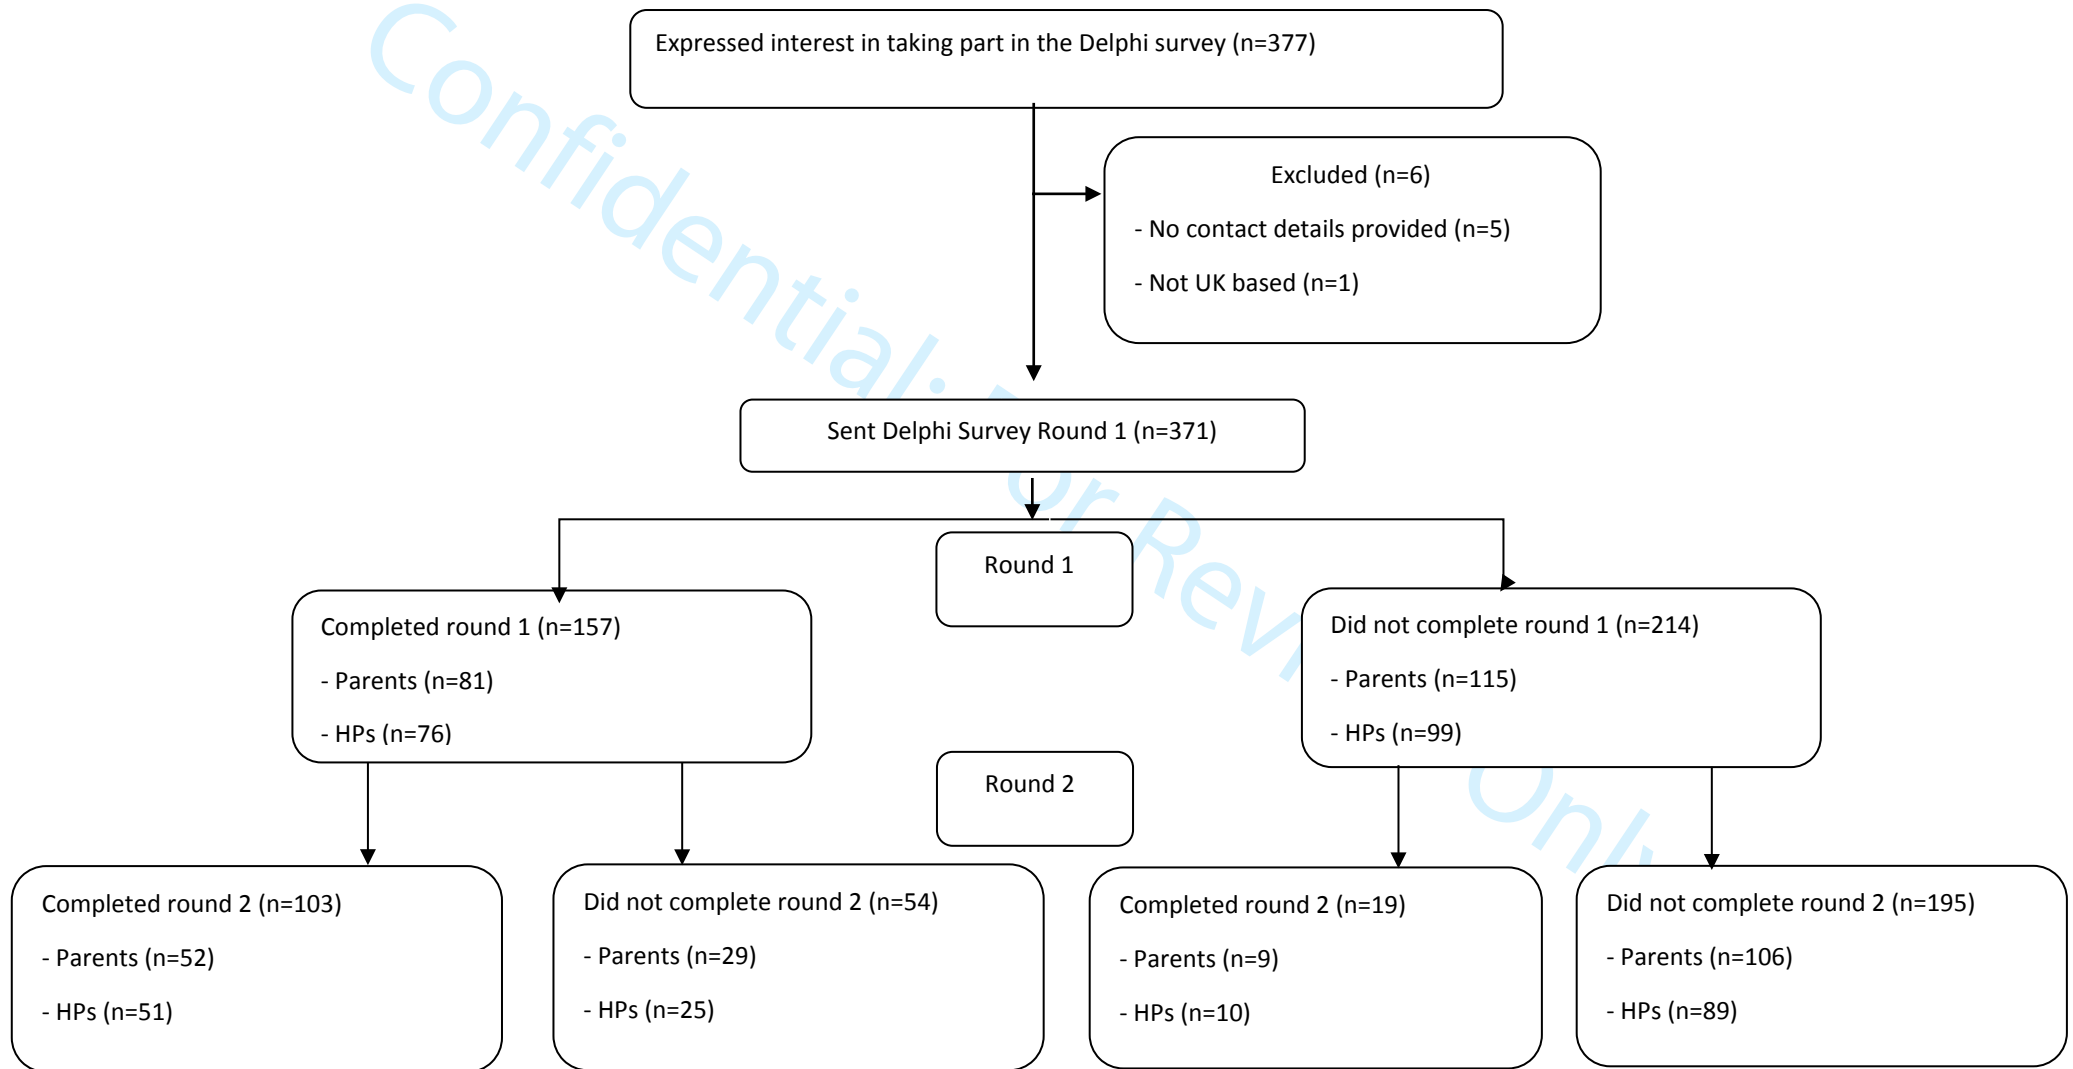

Figure 2. Outline of FEEDS Toolkit of Interventions

■ Ongoing interventions that influence EDSD strategies  
■ EDSD strategies for all children  
■ Physical and mixed EDSD only  
■ Seldom currently offered in NHS

**Individual context; address medical issues; sharing information; psychological/practical support for parents and wider family**

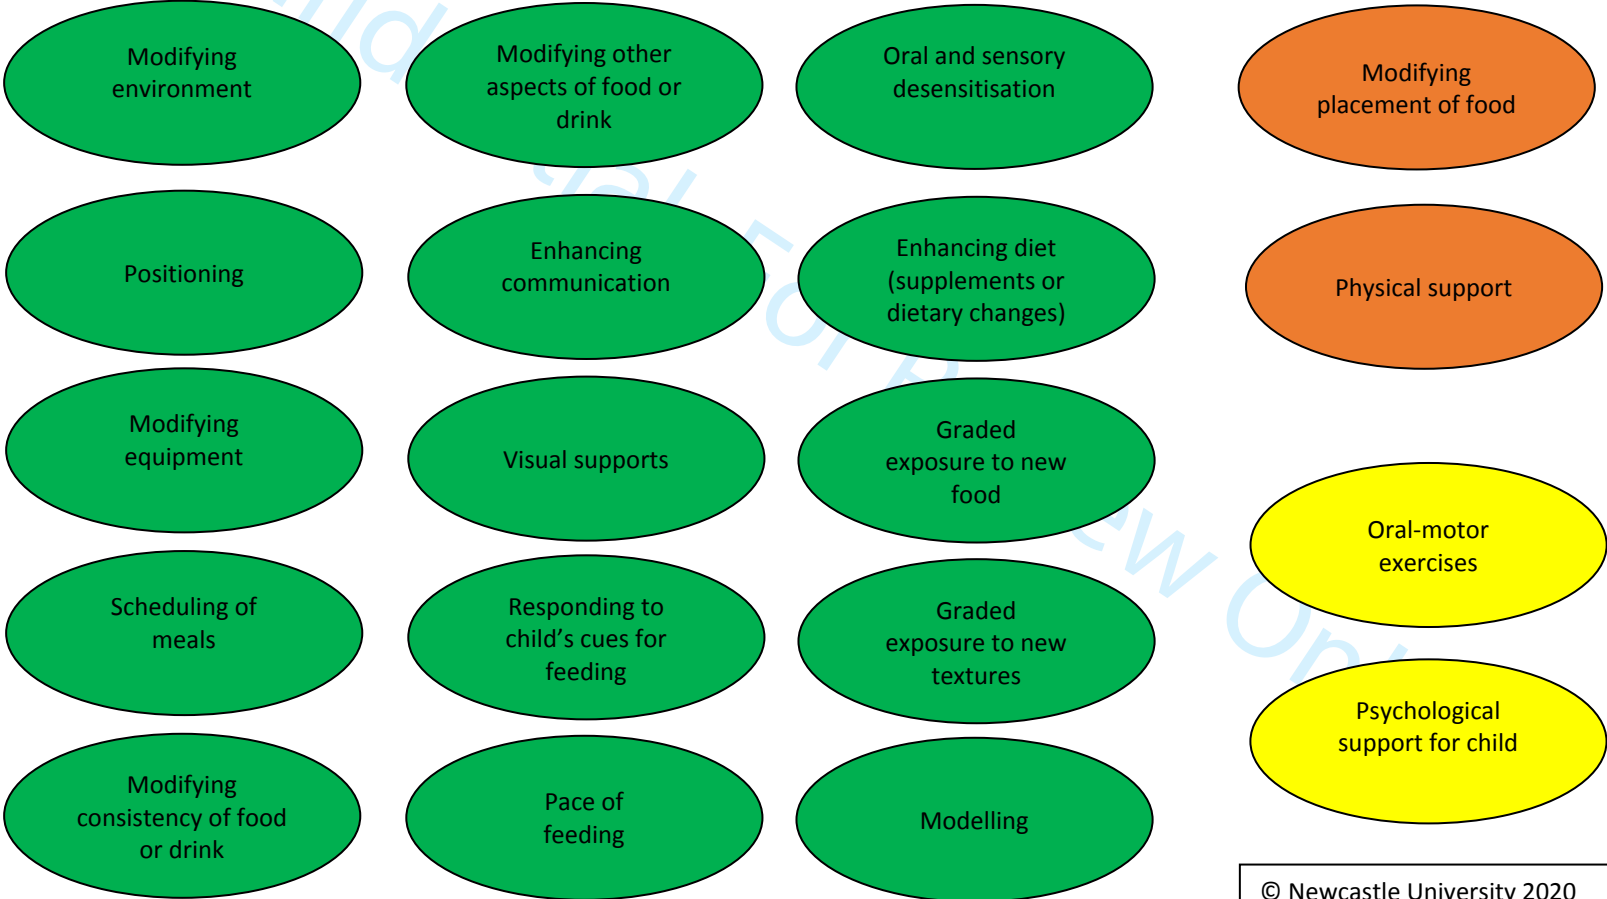

© Newcastle University 2020

**Supplementary Table 1. Characteristics of respondents who completed both rounds of Delphi Survey and those who only completed Round 2**

|                                                | Round 1<br>and 2<br>N=103 | Round 2<br>only<br>N=19 |
|------------------------------------------------|---------------------------|-------------------------|
| <b>Role</b>                                    |                           |                         |
| Parent                                         | 52 (51) <sup>c</sup>      | 9 (47)                  |
| Health Professional                            | 51 (50) <sup>c</sup>      | 10 (53)                 |
| <b>Age</b>                                     |                           |                         |
| Under 20 years                                 | 0 (0)                     | 0 (0)                   |
| 21-30 years                                    | 5 (5)                     | 0 (0)                   |
| 31-40 years                                    | 28 (27)                   | 12 (63)                 |
| 41-50 years                                    | 47 (46)                   | 5 (26)                  |
| 51-60 years                                    | 22 (21)                   | 2 (11)                  |
| 61-70 years                                    | 0 (0)                     | 0 (0)                   |
| Over 70 years                                  | 1 (1)                     | 0 (0)                   |
| Missing                                        | 0 (0)                     | 0 (0)                   |
| <b>Gender</b>                                  |                           |                         |
| Female                                         | 98 (95)                   | 18 (95)                 |
| Male                                           | 5 (5)                     | 1 (5)                   |
| Prefer not to say                              | 0 (0)                     | 0 (0)                   |
| Missing                                        | 0 (0)                     | 0 (0)                   |
| <b>Location</b>                                |                           |                         |
| England                                        |                           |                         |
| North East                                     | 15 (15)                   | 3 (16)                  |
| North West                                     | 8 (8)                     | 1 (5)                   |
| Yorkshire and Humber                           | 9 (9)                     | 2 (11)                  |
| Midlands                                       | 15 (15)                   | 4 (21)                  |
| South East including                           | 35 (34)                   | 6 (32)                  |
| London                                         |                           |                         |
| South West England                             | 10 (10)                   | 1 (5)                   |
| Scotland                                       | 5 (5)                     | 2 (11)                  |
| Northern Ireland                               | 2 (2)                     | 0 (0)                   |
| Wales                                          | 3 (3)                     | 0 (0)                   |
| Missing                                        | 1 (1)                     | 0 (0)                   |
| <b>Ethnicity</b>                               |                           |                         |
| White                                          | 98 (95)                   | 16 (84)                 |
| Black / African / Caribbean /<br>Black British | 0 (0)                     | 1 (5)                   |
| Asian / Asian British                          | 3 (3)                     | 1 (5)                   |
| Mixed / Multiple ethnic group                  | 2 (2)                     | 0 (0)                   |
| Other ethnic group                             | 0 (0)                     | 1 (5)                   |
| Prefer not to say                              | 0 (0)                     | 0 (0)                   |
| Missing                                        | 0 (0)                     | 0 (0)                   |
| <b>Type of EDSD of child<sup>a</sup></b>       |                           |                         |
| Physical EDSD                                  | 21 (20)                   | 1 (5)                   |
| Non-physical EDSD                              | 28 (27)                   | 7 (37)                  |
| Mixed EDSD <sup>b</sup>                        | 54 (52)                   | 11 (58)                 |
| Missing                                        | 0 (0)                     | 0 (0)                   |

<sup>a</sup> EDSD refers to eating, drinking and swallowing difficulties. <sup>b</sup> Mixed EDSD refers to children with physical and non-physical causes to their EDSD. <sup>c</sup> Percentages add up to more than 100% as a result of rounding the number to the nearest whole number.

**Supplementary Table 2. Characteristics of non-respondents to the Delphi Survey**

|                                             | Non-respondents<br>N=195  |                       |
|---------------------------------------------|---------------------------|-----------------------|
|                                             | Parents<br>N=269<br>n (%) | HPs<br>N=335<br>n (%) |
| Age (no missing data)                       |                           |                       |
| Under 20 years                              | 5 (2)                     | - <sup>a</sup>        |
| 21-30 years                                 | 23 (9)                    | - <sup>a</sup>        |
| 31-40 years                                 | 130 (48)                  | - <sup>a</sup>        |
| 41-50 years                                 | 95 (35)                   | - <sup>a</sup>        |
| 51-60 years                                 | 14 (5)                    | - <sup>a</sup>        |
| 61 years and over                           | 2 (1)                     | - <sup>a</sup>        |
| Gender (no missing data)                    |                           |                       |
| Female                                      | 254 (94)                  | - <sup>a</sup>        |
| Male                                        | 15 (6)                    | - <sup>a</sup>        |
| Prefer not to say                           | 0 (0)                     | - <sup>a</sup>        |
| Location                                    |                           |                       |
| England                                     |                           |                       |
| North East                                  | 48 (18)                   | 29 (9)                |
| North West                                  | 20 (7)                    | 22 (7)                |
| Yorkshire and Humber                        | 28 (10)                   | 49 (15)               |
| Midlands                                    | 66 (25)                   | 47 (14)               |
| South East including London                 | 56 (21)                   | 136 (41)              |
| South West                                  | 29 (11)                   | 14 (4)                |
| Scotland                                    | 11 (4)                    | 14 (4)                |
| Northern Ireland                            | 4 (2)                     | 11 (3)                |
| Wales                                       | 7 (3)                     | 13 (4)                |
| Missing                                     | 0 (0)                     | 0 (0)                 |
| Ethnicity (no missing data)                 |                           |                       |
| White                                       | 234 (87)                  | - <sup>a</sup>        |
| Asian / Asian British                       | 22 (8)                    | - <sup>a</sup>        |
| Black / African / Caribbean / Black British | 4 (2)                     | - <sup>a</sup>        |
| Mixed / Multiple ethnic group               | 7 (3)                     | - <sup>a</sup>        |
| Other ethnic group                          | 0 (0)                     | - <sup>a</sup>        |
| Prefer not to say                           | 2 (1)                     | - <sup>a</sup>        |
| Nature of child's EDSD                      |                           |                       |
| Physical EDSD                               | 58 (22)                   | 63 (19)               |
| Nonphysical EDSD                            | 141 (52)                  | 23 (7)                |
| Mixed EDSD                                  | 59 (22)                   | 248 (74)              |
| Missing                                     | 11 (4)                    | 0 (0)                 |

<sup>a</sup> Data not collected in national survey.

**Supplementary Table 3. Parents' and health professionals' ratings of interventions on Round 1 of the Delphi Survey**

|                                          | n  | Not Important<br>(score of 0-3)<br>% | Important but<br>not essential<br>(score of 4-6)<br>% | Essential<br>(score of 7-9)<br>% | n  | Not important<br>(score of 0-3)<br>% | Important but<br>not essential<br>(score of 4-6)<br>% | Essential<br>(score of 7-9)<br>% |
|------------------------------------------|----|--------------------------------------|-------------------------------------------------------|----------------------------------|----|--------------------------------------|-------------------------------------------------------|----------------------------------|
| Modifying environment                    | 78 | 3                                    | 31                                                    | <b>67</b>                        | 74 | 0                                    | 14                                                    | <b>87</b>                        |
| Positioning                              | 72 | 1                                    | 7                                                     | <b>92</b>                        | 74 | 0                                    | 3                                                     | <b>97</b>                        |
| Modifying equipment                      | 75 | 7                                    | 17                                                    | <b>76</b>                        | 74 | 0                                    | 14                                                    | <b>87</b>                        |
| Scheduling of meals                      | 79 | 13                                   | 34                                                    | 53                               | 74 | 0                                    | 18                                                    | <b>82</b>                        |
| Modifying consistency of food or drink   | 70 | 9                                    | 13                                                    | <b>79</b>                        | 72 | 1                                    | 13                                                    | <b>86</b>                        |
| Modifying other aspects of food or drink | 76 | 5                                    | 21                                                    | <b>74</b>                        | 73 | 3                                    | 22                                                    | <b>75</b>                        |
| Modifying placement of food              | 60 | 10                                   | 22                                                    | <b>68</b>                        | 70 | 3                                    | 19                                                    | <b>79</b>                        |
| Enhancing communication                  | 75 | 4                                    | 20                                                    | <b>76</b>                        | 73 | 0                                    | 18                                                    | <b>82</b>                        |
| Visual supports                          | 71 | 11                                   | 37                                                    | 52                               | 71 | 0                                    | 37                                                    | 63                               |
| Responding to a child's cues             | 64 | 5                                    | 13                                                    | <b>83</b>                        | 71 | 1                                    | 4                                                     | <b>94</b>                        |
| Pace of feeding                          | 70 | 1                                    | 21                                                    | <b>77</b>                        | 71 | 0                                    | 4                                                     | <b>96</b>                        |
| Physical supports                        | 54 | 13                                   | 15                                                    | <b>72</b>                        | 67 | 3                                    | 28                                                    | <b>69</b>                        |
| Medication                               | 49 | 8                                    | 14                                                    | <b>78</b>                        | 70 | 0                                    | 14                                                    | <b>86</b>                        |
| Energy supplements                       | 45 | 13                                   | 24                                                    | 62                               | 68 | 0                                    | 27                                                    | <b>74</b>                        |
| Vitamin or nutritional supplements       | 60 | 7                                    | 25                                                    | <b>68</b>                        | 68 | 0                                    | 32                                                    | <b>68</b>                        |
| Oral and sensory desensitisation         | 68 | 6                                    | 20                                                    | <b>72</b>                        | 72 | 10                                   | 22                                                    | <b>68</b>                        |
| Oral-motor exercises                     | 59 | 7                                    | 20                                                    | <b>73</b>                        | 68 | 27                                   | 34                                                    | 40                               |
| Graded exposure to new food              | 73 | 6                                    | 29                                                    | 66                               | 72 | 0                                    | 15                                                    | <b>85</b>                        |
| Graded exposure to new textures          | 75 | 3                                    | 29                                                    | <b>68</b>                        | 73 | 0                                    | 19                                                    | <b>81</b>                        |
| Changing behaviour at mealtimes          | 76 | 7                                    | 37                                                    | 57                               | 73 | 4                                    | 33                                                    | 63                               |
| Modelling                                | 79 | 3                                    | 18                                                    | <b>80</b>                        | 73 | 0                                    | 18                                                    | <b>82</b>                        |
| Training to self-feed                    | 69 | 6                                    | 26                                                    | <b>68</b>                        | 72 | 4                                    | 49                                                    | 47                               |
| Support for parents                      | 74 | 3                                    | 16                                                    | <b>81</b>                        | 73 | 0                                    | 16                                                    | <b>84</b>                        |
| Sharing information                      | 76 | 0                                    | 11                                                    | <b>90</b>                        | 73 | 0                                    | 6                                                     | <b>95</b>                        |
| Psychological support for child          | 65 | 9                                    | 19                                                    | <b>72</b>                        | 70 | 3                                    | 34                                                    | 63                               |

The above figures are for those respondents who were able to score individual interventions (i.e. those who had used them) and therefore do not include those who reported being unable to score or for whom data was missing. Percentages were rounded to the nearest whole number and therefore rounded totals are occasionally different to 100%. Scores above the consensus rating of  $\geq 67\%$  are shown in bold.



**Supplementary Table 4. Parents' and health professionals' ratings of interventions on Round 2 of the Delphi Survey**

| Intervention                             | Parents<br>N=61 |                                      |                                                       |                                  | Health professionals<br>N=61 |                                      |                                                       |                                  |
|------------------------------------------|-----------------|--------------------------------------|-------------------------------------------------------|----------------------------------|------------------------------|--------------------------------------|-------------------------------------------------------|----------------------------------|
|                                          | n               | Not Important<br>(score of 0-3)<br>% | Important but<br>not essential<br>(score of 4-6)<br>% | Essential<br>(score of 7-9)<br>% | n                            | Not important<br>(score of 0-3)<br>% | Important but<br>not essential<br>(score of 4-6)<br>% | Essential<br>(score of 7-9)<br>% |
| Modifying environment                    | 60              | 2                                    | 22                                                    | <b>77</b>                        | 57                           | 0                                    | 5                                                     | <b>95</b>                        |
| Positioning                              | 54              | 2                                    | 2                                                     | <b>96</b>                        | 57                           | 0                                    | 0                                                     | <b>100</b>                       |
| Modifying equipment                      | 54              | 4                                    | 4                                                     | <b>93</b>                        | 57                           | 0                                    | 11                                                    | <b>90</b>                        |
| Scheduling of meals                      | 58              | 5                                    | 45                                                    | 50                               | 57                           | 0                                    | 18                                                    | <b>83</b>                        |
| Modifying consistency of food or drink   | 56              | 2                                    | 20                                                    | <b>79</b>                        | 54                           | 0                                    | 4                                                     | <b>96</b>                        |
| Modifying other aspects of food or drink | 59              | 3                                    | 10                                                    | <b>86</b>                        | 57                           | 2                                    | 16                                                    | <b>83</b>                        |
| Modifying placement of food              | 48              | 2                                    | 23                                                    | <b>75</b>                        | 57                           | 0                                    | 11                                                    | <b>90</b>                        |
| Enhancing communication                  | 59              | 2                                    | 12                                                    | <b>86</b>                        | 57                           | 0                                    | 11                                                    | <b>90</b>                        |
| Visual supports                          | 54              | 4                                    | 44                                                    | 52                               | 57                           | 2                                    | 26                                                    | <b>72</b>                        |
| Responding to a child's cues             | 55              | 0                                    | 7                                                     | <b>93</b>                        | 56                           | 0                                    | 4                                                     | <b>96</b>                        |
| Pace of feeding                          | 56              | 0                                    | 11                                                    | <b>89</b>                        | 56                           | 0                                    | 0                                                     | <b>100</b>                       |
| Physical supports                        | 44              | 5                                    | 14                                                    | <b>82</b>                        | 57                           | 4                                    | 16                                                    | <b>81</b>                        |
| Medication                               | 47              | 4                                    | 9                                                     | <b>87</b>                        | 57                           | 2                                    | 7                                                     | <b>91</b>                        |
| Energy supplements                       | 42              | 2                                    | 29                                                    | <b>69</b>                        | 55                           | 0                                    | 27                                                    | <b>73</b>                        |
| Vitamin or nutritional supplements       | 54              | 0                                    | 15                                                    | <b>85</b>                        | 55                           | 0                                    | 26                                                    | <b>75</b>                        |
| Oral and sensory desensitisation         | 54              | 6                                    | 13                                                    | <b>82</b>                        | 57                           | 9                                    | 16                                                    | <b>75</b>                        |
| Oral-motor exercises                     | 50              | 4                                    | 26                                                    | <b>70</b>                        | 57                           | 35                                   | 30                                                    | 35                               |
| Graded exposure to new food              | 60              | 3                                    | 27                                                    | <b>70</b>                        | 57                           | 4                                    | 12                                                    | <b>84</b>                        |
| Graded exposure to new textures          | 59              | 2                                    | 2                                                     | <b>76</b>                        | 57                           | 0                                    | 19                                                    | <b>81</b>                        |
| Changing behaviour at mealtimes          | 59              | 7                                    | 36                                                    | 58                               | 57                           | 2                                    | 42                                                    | 56                               |
| Modelling                                | 60              | 2                                    | 22                                                    | <b>77</b>                        | 57                           | 0                                    | 18                                                    | <b>83</b>                        |
| Training to self-feed                    | 56              | 5                                    | 39                                                    | 55                               | 56                           | 4                                    | 50                                                    | 46                               |
| Support for parents                      | 60              | 2                                    | 3                                                     | <b>95</b>                        | 56                           | 0                                    | 4                                                     | <b>96</b>                        |
| Sharing information                      | 60              | 0                                    | 0                                                     | <b>100</b>                       | 57                           | 0                                    | 4                                                     | <b>97</b>                        |
| Psychological support for child          | 52              | 4                                    | 19                                                    | <b>77</b>                        | 56                           | 4                                    | 38                                                    | 59                               |

The above figures are for those respondents who were able to score individual interventions (i.e. those who had used them) and therefore do not include those who reported being unable to score or for whom data was missing. Percentages were rounded to the nearest whole number and therefore rounded totals are occasionally different to 100%. Scores above the consensus rating of  $\geq 67\%$  are shown in bold.

**Supplementary Table 5. Parents' and health professionals' ratings of outcomes on Round 1 of the Delphi Survey**

|                                        | Parents<br>N=81 |                                      |                                                       |                                  | Health professionals<br>N=76 |                                      |                                                       |                                  |
|----------------------------------------|-----------------|--------------------------------------|-------------------------------------------------------|----------------------------------|------------------------------|--------------------------------------|-------------------------------------------------------|----------------------------------|
|                                        | n               | Not Important<br>(score of 0-3)<br>% | Important but<br>not essential<br>(score of 4-6)<br>% | Essential<br>(score of 7-9)<br>% | n                            | Not important<br>(score of 0-3)<br>% | Important but<br>not essential<br>(score of 4-6)<br>% | Essential<br>(score of 7-9)<br>% |
| General Health                         | 80              | 1                                    | 10                                                    | <b>89</b>                        | 76                           | 0                                    | 7                                                     | <b>93</b>                        |
| Weight                                 | 80              | 6                                    | 41                                                    | 53                               | 76                           | 4                                    | 45                                                    | 51                               |
| Height                                 | 78              | 18                                   | 51                                                    | 31                               | 76                           | 18                                   | 50                                                    | 32                               |
| Growth                                 | 79              | 0                                    | 25                                                    | <b>75</b>                        | 76                           | 0                                    | 24                                                    | <b>76</b>                        |
| Nutrition                              | 81              | 0                                    | 11                                                    | <b>89</b>                        | 76                           | 0                                    | 3                                                     | <b>97</b>                        |
| Child's enjoyment of mealtimes         | 80              | 1                                    | 16                                                    | <b>83</b>                        | 76                           | 0                                    | 9                                                     | <b>91</b>                        |
| Parent's enjoyment of mealtimes        | 81              | 7                                    | 51                                                    | 42                               | 76                           | 0                                    | 24                                                    | <b>76</b>                        |
| Quality of life of child               | 81              | 1                                    | 4                                                     | <b>95</b>                        | 75                           | 0                                    | 8                                                     | <b>92</b>                        |
| Quality of life of family              | 81              | 1                                    | 21                                                    | <b>78</b>                        | 75                           | 0                                    | 13                                                    | <b>87</b>                        |
| Mental health of parent                | 81              | 0                                    | 17                                                    | <b>83</b>                        | 76                           | 0                                    | 16                                                    | <b>84</b>                        |
| Safety                                 | 78              | 0                                    | 3                                                     | <b>97</b>                        | 75                           | 0                                    | 3                                                     | <b>97</b>                        |
| Oral-motor control                     | 76              | 0                                    | 13                                                    | <b>87</b>                        | 74                           | 3                                    | 23                                                    | <b>74</b>                        |
| Efficiency                             | 80              | 13                                   | 44                                                    | 44                               | 75                           | 5                                    | 35                                                    | 60                               |
| Independence                           | 80              | 13                                   | 28                                                    | 60                               | 75                           | 3                                    | <b>67</b>                                             | 31                               |
| Variety                                | 81              | 5                                    | 44                                                    | 51                               | 75                           | 4                                    | <b>73</b>                                             | 23                               |
| Amount                                 | 81              | 4                                    | 35                                                    | 62                               | 75                           | 5                                    | 55                                                    | 40                               |
| Appetite                               | 81              | 3                                    | 38                                                    | 59                               | 75                           | 3                                    | 53                                                    | 44                               |
| Mealtime behaviour                     | 80              | 14                                   | 45                                                    | 41                               | 74                           | 10                                   | 61                                                    | 30                               |
| Mealtime Interaction                   | 79              | 4                                    | 35                                                    | 61                               | 74                           | 1                                    | 18                                                    | <b>81</b>                        |
| Social participation                   | 80              | 4                                    | 46                                                    | 50                               | 74                           | 1                                    | 22                                                    | <b>77</b>                        |
| Child's understanding of mealtimes     | 80              | 4                                    | 45                                                    | 51                               | 74                           | 4                                    | 45                                                    | 51                               |
| Parent's understanding of child's EDSD | 80              | 1                                    | 10                                                    | <b>89</b>                        | 72                           | 1                                    | 10                                                    | <b>89</b>                        |

The above figures are for those respondents who were able to score individual interventions (i.e. those who had used them) and therefore do not include those who reported being unable to score or for whom data was missing. Percentages were rounded to the nearest whole number and therefore rounded totals are occasionally different to 100%. Scores above the consensus rating of  $\geq 67\%$  are shown in bold.

**Supplementary Table 6. Parents' and health professionals' ratings of outcomes on Round 2 of the Delphi Survey**

| Outcome                                | Parents<br>N=61 |                                      |                                                       |                                  | Health professionals<br>N=61 |                                      |                                                       |                                  |
|----------------------------------------|-----------------|--------------------------------------|-------------------------------------------------------|----------------------------------|------------------------------|--------------------------------------|-------------------------------------------------------|----------------------------------|
|                                        | n               | Not Important<br>(score of 0-3)<br>% | Important but<br>not essential<br>(score of 4-6)<br>% | Essential<br>(score of 7-9)<br>% | n                            | Not important<br>(score of 0-3)<br>% | Important but<br>not essential<br>(score of 4-6)<br>% | Essential<br>(score of 7-9)<br>% |
| General Health                         | 61              | 0                                    | 3                                                     | <b>97</b>                        | 61                           | 0                                    | 2                                                     | <b>98</b>                        |
| Weight                                 | 61              | 0                                    | 66                                                    | 34                               | 61                           | 0                                    | 53                                                    | 48                               |
| Height                                 | 61              | 13                                   | <b>75</b>                                             | 12                               | 61                           | 13                                   | <b>75</b>                                             | 12                               |
| Growth                                 | 61              | 0                                    | 18                                                    | <b>82</b>                        | 61                           | 0                                    | 12                                                    | <b>89</b>                        |
| Nutrition                              | 61              | 0                                    | 5                                                     | <b>95</b>                        | 60                           | 0                                    | 2                                                     | <b>98</b>                        |
| Child's enjoyment of mealtimes         | 61              | 0                                    | 10                                                    | <b>90</b>                        | 60                           | 0                                    | 2                                                     | <b>98</b>                        |
| Parent's enjoyment of mealtimes        | 61              | 8                                    | 53                                                    | 39                               | 59                           | 0                                    | 22                                                    | <b>78</b>                        |
| Quality of life of child               | 61              | 0                                    | 2                                                     | <b>98</b>                        | 59                           | 0                                    | 0                                                     | <b>100</b>                       |
| Quality of life of family              | 61              | 0                                    | 10                                                    | <b>90</b>                        | 58                           | 0                                    | 3                                                     | <b>97</b>                        |
| Mental health of parent                | 61              | 0                                    | 7                                                     | <b>93</b>                        | 58                           | 0                                    | 3                                                     | <b>97</b>                        |
| Safety                                 | 61              | 0                                    | 0                                                     | <b>100</b>                       | 58                           | 0                                    | 0                                                     | <b>100</b>                       |
| Oral-motor control                     | 56              | 0                                    | 14                                                    | <b>86</b>                        | 58                           | 0                                    | 28                                                    | <b>72</b>                        |
| Efficiency                             | 60              | 13                                   | <b>70</b>                                             | 17                               | 57                           | 5                                    | 49                                                    | 46                               |
| Independence                           | 61              | 10                                   | 48                                                    | 43                               | 58                           | 3                                    | <b>69</b>                                             | 28                               |
| Variety                                | 61              | 3                                    | <b>71</b>                                             | 26                               | 57                           | 4                                    | <b>84</b>                                             | 12                               |
| Amount                                 | 61              | 0                                    | 48                                                    | 53                               | 56                           | 2                                    | <b>73</b>                                             | 25                               |
| Appetite                               | 61              | 2                                    | 53                                                    | 46                               | 56                           | 2                                    | 61                                                    | 38                               |
| Mealtime behaviour                     | 61              | 8                                    | 57                                                    | 34                               | 57                           | 5                                    | <b>68</b>                                             | 26                               |
| Mealtime Interaction                   | 60              | 5                                    | 30                                                    | 65                               | 57                           | 0                                    | 21                                                    | <b>79</b>                        |
| Social participation                   | 60              | 10                                   | 37                                                    | 53                               | 57                           | 2                                    | 25                                                    | <b>74</b>                        |
| Child's understanding of mealtimes     | 60              | 3                                    | 38                                                    | 58                               | 57                           | 2                                    | 58                                                    | 40                               |
| Parent's understanding of child's EDSD | 60              | 0                                    | 5                                                     | <b>95</b>                        | 57                           | 0                                    | 7                                                     | <b>93</b>                        |

The above figures are for those respondents who were able to score individual interventions (i.e. those who had used them) and therefore do not include those who reported being unable to score or for whom data was missing. Percentages were rounded to the nearest whole number and therefore rounded totals are occasionally different to 100%. Scores above the consensus rating of  $\geq 67\%$  are shown in bold.

## FEEDS Delphi Survey – Round 1

You are invited to take part in the next step of the national UK research study “FEEDS: Focus on Early Eating, Drinking and Swallowing review”.

**Below is our information sheet with more information about the survey. Once you have read this information, if you would like to take part please click the forward arrow at the bottom of this text.**

### What is the study about?

The study aims to find out about strategies to improve eating, drinking and swallowing difficulties that can be used at home by parents of young children with developmental difficulties. “Strategies” refers to the things people do to help children with eating and drinking difficulties.

### Why have I been invited to take part?

You may have previously completed one of our surveys – thank you again for doing so. You expressed an interest in being contacted about this survey as part of our ongoing research.

### What will I have to do?

This is a Delphi Survey, which is a way to seek agreement between different groups of people. This type of survey has stages, where families and clinicians complete questions two or three times. Each round takes approximately 15 minutes to complete. Here is some information about each round:

**Round 1** – You will be presented with a list of strategies for improving eating and drinking and a list of potential benefits of the strategies (we are calling these outcomes).

You will be asked to rate how important you think that each strategy and outcome is on a scale from 1 (not important) to 9 (essential). There will be an option to add any strategies or outcomes you think are missing and make any further comments you have.

**Round 2/3** – A few weeks after completing the previous round, you will receive another email asking you to complete the survey again.

You will be asked to complete the ratings again.

*It is important that, if you agree to take part, you complete all rounds of the survey.*

### How do I take part?

To enter the survey, please click the forward arrow at the bottom of this page. We plan for this round (round 1) of the survey to be open for 3 weeks.

### What happens to the information I give in the study?

Your responses to the survey will be confidential. By completing the survey, you are consenting to take part in this stage of the research. If you wish to stop the survey at any time, you can do so. We will keep the information you have already given us unless you tell us that you no longer want to take part and would like to have your information removed completely.

We will store any personal information you share with us safely and securely at Newcastle University (in line with data protection laws). All personal information shared with us will be destroyed 6-12 months after the end of the study (currently planned to be December 2019).

The information provided during the survey will be looked at by the research team and may also be looked at by Newcastle upon Tyne Hospitals NHS Foundation Trust or representatives from the regulatory authorities.

### What happens if I take part?

At the end of the final round of the survey, you will be entered into a prize draw to **win a £100 voucher**. There will be five vouchers available for parents / carers and five for healthcare professionals. We will also send you a summary of the results of this survey and the wider study.

After the final round of the survey, we will be running two meetings where we draw together all the study findings, and make conclusions. These meetings are expected to take place in April / May 2019. We would like parents, professionals and researchers to take part in the meetings. We expect to invite 10-20 people to each meeting. If you would like to participate, you can let us know this at the end of round two of the survey.

### Who is leading the study?

The study is being led by clinical researchers at Newcastle University and Newcastle upon Tyne Hospitals NHS Trust in collaboration with colleagues from Exeter, Sussex and London. The study is funded by the National Institute for Health Research Health Technology Assessment (NIHR HTA) programme – the research part of the NHS.

### Who do I contact if I'd like more information about the research?

If you have questions please contact Dr Helen Taylor, FEEDS researcher via email at [Feeds@ncl.ac.uk](mailto:Feeds@ncl.ac.uk) by telephone on 0191 2821379 or by post at:

Dr Helen Taylor  
Development and Disability Group, Newcastle University  
3<sup>rd</sup> Floor, Sir James Spence Institute  
Royal Victoria Infirmary  
Queen Victoria Road  
Newcastle upon Tyne  
NE1 4LP

1  
2  
3 Or see the project website: <https://tinyurl.com/FEEDSstudy>  
4

5  
6 What if I have concerns or a complaint?  
7

8 If you have any concerns about this research and would like to discuss them further, please  
9 contact Dr Helen Taylor, who will discuss your concerns with Dr Jeremy Parr or Dr Lindsay  
10 Pennington who are leading the study.  
11

12  
13 If you prefer to raise your concerns with someone not involved with the study, you can  
14 contact the Patient Advice and Liaison Service (PALS). This service is confidential and can  
15 be contacted on Freephone: 0800 032 0202.  
16

17  
18 Alternatively if you wish to make a formal complaint, you can contact the Patient Relations  
19 Department through any of the details below:  
20

21 Telephone: 0191 223 1382 or 0191 223 1454

22 Email: [patient.relations@nuth.nhs.uk](mailto:patient.relations@nuth.nhs.uk)

23 Address: Patient Relations Department

24 The Newcastle upon Tyne Hospitals NHS Foundation Trust

25 The Freeman Hospital

26 Newcastle upon Tyne

27 NE7 7DN  
28  
29  
30  
31

32 Thank you very much for your help with this research.  
33  
34  
35  
36  
37  
38  
39  
40  
41  
42  
43  
44  
45  
46  
47  
48  
49  
50  
51  
52  
53  
54  
55  
56  
57  
58  
59  
60

1  
2  
3 Thank you for taking the time to read the information about the study.  
4

5 To give your consent to take part, please respond to the following statement:  
6  
7

8 I have read the information about the study and I agree to take part by completing the  
9 survey.  
10

11 Please note that you cannot take part without answering the question. If you don't agree to  
12 take part, we would like to thank you for your time reading this.  
13  
14

15  Agree  
16

17  Disagree  
18  
19  
20  
21  
22  
23  
24  
25  
26  
27  
28  
29  
30  
31  
32  
33  
34  
35  
36  
37  
38  
39  
40  
41  
42  
43  
44  
45  
46  
47  
48  
49  
50  
51  
52  
53  
54  
55  
56  
57  
58  
59  
60

1  
2  
3 Welcome to the FEEDS Delphi Survey and thank you for taking part.  
4

5 This is the **first** part of the survey.  
6  
7

8 In this survey, eating, drinking and swallowing difficulties are referred to as "eating and  
9 drinking difficulties". The term "strategy" or "strategies" is used to describe what some  
10 people might call intervention, therapy, treatment, advice or things that help including self-  
11 help. The potential benefits of the strategies are referred to as "outcomes".  
12

13  
14 The survey is divided into 2 sections:  
15

- 16 - In part A we ask about a list of **outcomes** related to improved eating and drinking.
- 17
- 18 - In part B, we ask about a list of **strategies** to improve eating and drinking.
- 19

20  
21 The lists have been developed from information gathered during our research so far.  
22  
23  
24  
25  
26  
27  
28  
29  
30  
31  
32  
33  
34  
35  
36  
37  
38  
39  
40  
41  
42  
43  
44  
45  
46  
47  
48  
49  
50  
51  
52  
53  
54  
55  
56  
57  
58  
59  
60



1  
2  
3 Q1 Please describe yourself:  
4

5  Parent / guardian / caregiver  
6  
7

8  Healthcare professional  
9  
10

11  
12  
13 Q2 What is your age (in years)?  
14

15  Under 20  
16

17  21-30  
18

19  31-40  
20

21  41-50  
22

23  51-60  
24

25  61-70  
26

27  Over 70  
28  
29  
30  
31  
32  
33  
34  
35

36 Q3 What is your gender?  
37

38  Male  
39

40  Female  
41

42  Prefer not to say  
43

44  Other (please specify): \_\_\_\_\_  
45  
46  
47  
48  
49  
50  
51  
52  
53  
54  
55  
56  
57  
58  
59  
60

1  
2  
3 Q4

4 **For parents / guardians / caregivers:** Where do you live?

5  
6 **For healthcare professionals:** Where do you work?

- 7  
8  
9  North East England
- 10  
11  North West England
- 12  
13  Yorkshire and Humber
- 14  
15  East Midlands
- 16  
17  West Midlands
- 18  
19  South East including London
- 20  
21  South West
- 22  
23  Scotland
- 24  
25  Northern Ireland
- 26  
27  Wales
- 28  
29  
30  
31  
32  
33  
34  
35  
36  
37

38 Q5 What is your ethnicity?

- 39  
40  White
- 41  
42  Black/ African / Caribbean / Black British
- 43  
44  Asian / Asian British
- 45  
46  Mixed / Multiple Ethnic Groups
- 47  
48  Other Ethnic Group
- 49  
50  Prefer not to say
- 51  
52  
53  
54  
55  
56  
57  
58  
59  
60

1  
2  
3 Q6 How did you hear about the survey?  
4  
5

6  Took part in previous FEEDS survey  
7

8  Voluntary Organisation / Charity  
9

10  ASD-UK / Daslne database  
11

12  Parental network / support group  
13

14  Professional Organisation / Network  
15

16  Other (please specify): \_\_\_\_\_  
17  
18  
19  
20  
21

22  
23  
24 Q7 Children can have different types of eating and drinking difficulties. Which difficulties are  
25 you answering the survey about?  
26

27  **Physical difficulties** (Reduced control of the muscles of the lips, tongue, mouth and  
28 throat) (1)  
29

30  **Non-physical difficulties** (Sensory or behavioural issues leading to restricted or  
31 selective eating and rituals associated with food or mealtimes) (2)  
32  
33

34  **Both physical and non-physical difficulties** (3)  
35  
36  
37  
38  
39  
40  
41  
42  
43  
44  
45  
46  
47  
48  
49  
50  
51  
52  
53  
54  
55  
56  
57  
58  
59  
60

1  
2  
3 **Part A: Outcomes**  
4

5 Strategies for improving eating and drinking are tested to see if they work.  
6

7  
8 We want to know what we should measure in order to see if a strategy works - what are the  
9 most important outcomes or results?  
10

11 **Please tell us how important you think each of the following outcomes are.**  
12  
13  
14  
15  
16  
17  
18  
19  
20  
21  
22  
23  
24  
25  
26  
27  
28  
29  
30  
31  
32  
33  
34  
35  
36  
37  
38  
39  
40  
41  
42  
43  
44  
45  
46  
47  
48  
49  
50  
51  
52  
53  
54  
55  
56  
57  
58  
59  
60

Confidential: For Review Only

**Q8 Please tell us how important you think each of the outcomes below are:**

If you feel unable to comment based on your knowledge and / or experience or feel the item is not relevant or not applicable to you, please select 'Not Applicable / Not relevant'

|                                                                             | Not important<br>1    | 2                     | 3                     | 4                     | Important but not essential<br>5 | 6                     | 7                     | 8                     | Essential<br>9        | Not applicable / Not relevant |
|-----------------------------------------------------------------------------|-----------------------|-----------------------|-----------------------|-----------------------|----------------------------------|-----------------------|-----------------------|-----------------------|-----------------------|-------------------------------|
| <b>General health</b> A child's overall health                              | <input type="radio"/>            | <input type="radio"/> | <input type="radio"/> | <input type="radio"/> | <input type="radio"/> | <input type="radio"/>         |
| <b>Weight</b> How much a child weighs                                       | <input type="radio"/>            | <input type="radio"/> | <input type="radio"/> | <input type="radio"/> | <input type="radio"/> | <input type="radio"/>         |
| <b>Height</b> How tall a child is                                           | <input type="radio"/>            | <input type="radio"/> | <input type="radio"/> | <input type="radio"/> | <input type="radio"/> | <input type="radio"/>         |
| <b>Growth</b> A change in a child's growth, including height and weight     | <input type="radio"/>            | <input type="radio"/> | <input type="radio"/> | <input type="radio"/> | <input type="radio"/> | <input type="radio"/>         |
| <b>Nutrition</b> A child's level of energy and nutrients for healthy growth | <input type="radio"/>            | <input type="radio"/> | <input type="radio"/> | <input type="radio"/> | <input type="radio"/> | <input type="radio"/>         |

Q9 Please provide any additional comments you have on any of the outcomes listed above here:

---

**Q10 Please tell us how important you think each of the outcomes below are:**

If you feel unable to comment based on your knowledge and / or experience or feel the item is not relevant or not applicable to you, please select 'Not Applicable / Not relevant'

|                                                                                                     | Not important<br>1    | 2                     | 3                     | 4                     | Important but not essential<br>5 | 6                     | 7                     | 8                     | Essential<br>9        | Not applicable / Not relevant |
|-----------------------------------------------------------------------------------------------------|-----------------------|-----------------------|-----------------------|-----------------------|----------------------------------|-----------------------|-----------------------|-----------------------|-----------------------|-------------------------------|
| <b>Child's enjoyment of mealtimes</b>                                                               | <input type="radio"/>            | <input type="radio"/> | <input type="radio"/> | <input type="radio"/> | <input type="radio"/> | <input type="radio"/>         |
| <b>Parent or caregiver's enjoyment of mealtimes</b>                                                 | <input type="radio"/>            | <input type="radio"/> | <input type="radio"/> | <input type="radio"/> | <input type="radio"/> | <input type="radio"/>         |
| <b>Quality of life of child</b><br>How satisfied a child feels about their life                     | <input type="radio"/>            | <input type="radio"/> | <input type="radio"/> | <input type="radio"/> | <input type="radio"/> | <input type="radio"/>         |
| <b>Quality of life of family</b><br>How satisfied other family members feel about their (own) lives | <input type="radio"/>            | <input type="radio"/> | <input type="radio"/> | <input type="radio"/> | <input type="radio"/> | <input type="radio"/>         |
| <b>Mental health of parent or caregiver</b><br>A parent / caregiver's mood and emotional wellbeing  | <input type="radio"/>            | <input type="radio"/> | <input type="radio"/> | <input type="radio"/> | <input type="radio"/> | <input type="radio"/>         |

**Q11 Please provide any additional comments you have on any of the outcomes listed above here:**

---

**Q12 Please tell us how important you think each of the outcomes below are:**

If you feel unable to comment based on your knowledge and / or experience or feel the item is not relevant or not applicable to you, please select 'Not Applicable / Not relevant'

|                                                                                         | Not important<br>1    | 2                     | 3                     | 4                     | Important but not essential<br>5 | 6                     | 7                     | 8                     | Essential<br>9        | Not applicable / Not relevant |
|-----------------------------------------------------------------------------------------|-----------------------|-----------------------|-----------------------|-----------------------|----------------------------------|-----------------------|-----------------------|-----------------------|-----------------------|-------------------------------|
| <b>Safety A</b>                                                                         |                       |                       |                       |                       |                                  |                       |                       |                       |                       |                               |
| child's ability to eat and drink safely without choking or aspirating                   | <input type="radio"/>            | <input type="radio"/> | <input type="radio"/> | <input type="radio"/> | <input type="radio"/> | <input type="radio"/>         |
| <b>Oral motor control A</b>                                                             |                       |                       |                       |                       |                                  |                       |                       |                       |                       |                               |
| child's ability to control the movement of their mouth, jaw, tongue or lips and swallow | <input type="radio"/>            | <input type="radio"/> | <input type="radio"/> | <input type="radio"/> | <input type="radio"/> | <input type="radio"/>         |
| <b>Efficiency</b>                                                                       |                       |                       |                       |                       |                                  |                       |                       |                       |                       |                               |
| A child's ability to eat and drink at a reasonable pace                                 | <input type="radio"/>            | <input type="radio"/> | <input type="radio"/> | <input type="radio"/> | <input type="radio"/> | <input type="radio"/>         |

**Q13 Please provide any additional comments you have on any of the outcomes listed above here:**

---

**Q14 Please tell us how important you think each of the outcomes below are:**

If you feel unable to comment based on your knowledge and / or experience or feel the item is not relevant or not applicable to you, please select 'Not Applicable / Not relevant'

|                                                                              | Not important<br>1    | 2                     | 3                     | 4                     | Important but not essential<br>5 | 6                     | 7                     | 8                     | Essential<br>9        | Not applicable / Not relevant |
|------------------------------------------------------------------------------|-----------------------|-----------------------|-----------------------|-----------------------|----------------------------------|-----------------------|-----------------------|-----------------------|-----------------------|-------------------------------|
| <b>Independence</b><br>A child's ability to feed themselves                  | <input type="radio"/>            | <input type="radio"/> | <input type="radio"/> | <input type="radio"/> | <input type="radio"/> | <input type="radio"/>         |
| <b>Variety</b><br>The range of foods or liquids a child eats or drinks       | <input type="radio"/>            | <input type="radio"/> | <input type="radio"/> | <input type="radio"/> | <input type="radio"/> | <input type="radio"/>         |
| <b>Amount</b><br>The amount of food or liquid a child eats or drinks per day | <input type="radio"/>            | <input type="radio"/> | <input type="radio"/> | <input type="radio"/> | <input type="radio"/> | <input type="radio"/>         |
| <b>Appetite</b><br>A child's level of hunger and desire for food / drink     | <input type="radio"/>            | <input type="radio"/> | <input type="radio"/> | <input type="radio"/> | <input type="radio"/> | <input type="radio"/>         |

**Q15 Please provide any additional comments you have on any of the outcomes listed above here:**

---



**Q16 Please tell us how important you think each of the outcomes below are:**

If you feel unable to comment based on your knowledge and / or experience or feel the item is not relevant or not applicable to you, please select 'Not Applicable / Not relevant'

|                                                                                                         | Not important<br>1    | 2                     | 3                     | 4                     | Important but not essential<br>5 | 6                     | 7                     | 8                     | Essential<br>9        | Not applicable / Not relevant |
|---------------------------------------------------------------------------------------------------------|-----------------------|-----------------------|-----------------------|-----------------------|----------------------------------|-----------------------|-----------------------|-----------------------|-----------------------|-------------------------------|
| <b>Mealtime behaviour</b><br>A child behaving appropriately during meals                                | <input type="radio"/>            | <input type="radio"/> | <input type="radio"/> | <input type="radio"/> | <input type="radio"/> | <input type="radio"/>         |
| <b>Mealtime interaction</b><br>The interaction between a child and the person feeding them at mealtimes | <input type="radio"/>            | <input type="radio"/> | <input type="radio"/> | <input type="radio"/> | <input type="radio"/> | <input type="radio"/>         |
| <b>Social participation</b> A child's overall involvement at mealtimes                                  | <input type="radio"/>            | <input type="radio"/> | <input type="radio"/> | <input type="radio"/> | <input type="radio"/> | <input type="radio"/>         |

Q17 Please provide any additional comments you have on any of the outcomes listed above here:

---

**Q18 Please tell us how important you think each of the outcomes below are:**

If you feel unable to comment based on your knowledge and / or experience or feel the item is not relevant or not applicable to you, please select 'Not Applicable / Not relevant'

|                                                                                    | Not important<br>1    | 2                     | 3                     | 4                     | Important but not essential<br>5 | 6                     | 7                     | 8                     | Essential<br>9        | Not applicable / Not relevant |
|------------------------------------------------------------------------------------|-----------------------|-----------------------|-----------------------|-----------------------|----------------------------------|-----------------------|-----------------------|-----------------------|-----------------------|-------------------------------|
| <b>Child's understanding</b>                                                       |                       |                       |                       |                       |                                  |                       |                       |                       |                       |                               |
| A child's understanding of mealtime activities and routines                        | <input type="radio"/>            | <input type="radio"/> | <input type="radio"/> | <input type="radio"/> | <input type="radio"/> | <input type="radio"/>         |
| <b>Parent or caregiver's understanding</b>                                         |                       |                       |                       |                       |                                  |                       |                       |                       |                       |                               |
| A parent / caregiver's insight into their child's eating and drinking difficulties | <input type="radio"/>            | <input type="radio"/> | <input type="radio"/> | <input type="radio"/> | <input type="radio"/> | <input type="radio"/>         |

Q19 Please provide any additional comments you have on any of the outcomes listed above here:

Q20 Please provide any additional outcomes you think are important or essential here:

---

## Part B: Strategies

A variety of strategies are used to improve eating and drinking difficulties in children with developmental difficulties.

We found that strategies are often used together as part of an 'intervention package'. We want to know which strategies are important to include in that 'intervention package'.

**For each of the strategies listed, please tell us how important you think it is that the strategy is included as part of an 'intervention package' for children with eating and drinking difficulties.**

Many of the strategies involve teaching children new behaviour and rely on techniques such as prompting or giving praise for the behaviours we want to encourage. Because these techniques apply to so many of the strategies, we have not included them in the descriptions below.

Please answer based on your own knowledge and experience, and what you may know of other people's experiences.

Q21 Please rate how important it is that each of the strategies below is included as part of an 'intervention package' for children with eating and drinking difficulties:

If you feel unable to comment based on your knowledge and / or experience or feel the item is not relevant or not applicable to you, please select 'Not applicable / Not relevant'

|                                                                                                                                                                                               | Not important<br>1    | 2                     | 3                     | 4                     | Important but not essential<br>5 | 6                     | 7                     | 8                     | Essential<br>9        | Not applicable / Not relevant |
|-----------------------------------------------------------------------------------------------------------------------------------------------------------------------------------------------|-----------------------|-----------------------|-----------------------|-----------------------|----------------------------------|-----------------------|-----------------------|-----------------------|-----------------------|-------------------------------|
| <b>Modifying environment</b>                                                                                                                                                                  |                       |                       |                       |                       |                                  |                       |                       |                       |                       |                               |
| Changing the physical or social setting at mealtimes (e.g. reducing distractions such as levels of noise; using distractions to reduce a child's attention on their food)                     | <input type="radio"/>            | <input type="radio"/> | <input type="radio"/> | <input type="radio"/> | <input type="radio"/> | <input type="radio"/>         |
| <b>Positioning</b> Ensuring a child is in the best position to eat and drink food safely and efficiently (e.g. a child sitting upright; providing support for head control)                   | <input type="radio"/>            | <input type="radio"/> | <input type="radio"/> | <input type="radio"/> | <input type="radio"/> | <input type="radio"/>         |
| <b>Modifying equipment</b>                                                                                                                                                                    |                       |                       |                       |                       |                                  |                       |                       |                       |                       |                               |
| Using different spoons, forks, plates, cups, bottles etc (e.g. doidy cup; plastic spoon)                                                                                                      | <input type="radio"/>            | <input type="radio"/> | <input type="radio"/> | <input type="radio"/> | <input type="radio"/> | <input type="radio"/>         |
| <b>Scheduling of meals</b>                                                                                                                                                                    |                       |                       |                       |                       |                                  |                       |                       |                       |                       |                               |
| Setting the timing of mealtimes to encourage a child's appetite and establish a mealtime routine (e.g. spreading meals / snacks throughout the day; setting a 30 minutes limit for mealtimes) | <input type="radio"/>            | <input type="radio"/> | <input type="radio"/> | <input type="radio"/> | <input type="radio"/> | <input type="radio"/>         |

Q22 Please provide any additional comments you have on any of the strategies listed above here:

Q23 Please rate how important it is that each of the strategies below is included as part of an 'intervention package' for children with eating and drinking difficulties:

If you feel unable to comment based on your knowledge and / or experience or feel the item is not relevant or not applicable to you, please select 'Not applicable / Not relevant'

|                                                                                                                                                                                                                                             | Not important<br>1    | 2                     | 3                     | 4                     | Important but not essential<br>5 | 6                     | 7                     | 8                     | Essential<br>9        | Not applicable / Not relevant |
|---------------------------------------------------------------------------------------------------------------------------------------------------------------------------------------------------------------------------------------------|-----------------------|-----------------------|-----------------------|-----------------------|----------------------------------|-----------------------|-----------------------|-----------------------|-----------------------|-------------------------------|
| <b>Modifying consistency of food or drink</b> Changing the consistency of a child's food or drink (e.g. pureeing food; thickening food or drink)                                                                                            | <input type="radio"/>            | <input type="radio"/> | <input type="radio"/> | <input type="radio"/> | <input type="radio"/> | <input type="radio"/>         |
| <b>Modifying other aspects of food or drink</b> Changing the temperature, taste amount or presentation of a child's food or drink (e.g. presenting different foods so they do not touch each other; mixing liked foods with disliked foods) | <input type="radio"/>            | <input type="radio"/> | <input type="radio"/> | <input type="radio"/> | <input type="radio"/> | <input type="radio"/>         |
| <b>Modifying placement of food</b> Changing where food is placed in a child's mouth to help chewing or swallowing (e.g. placing food to the side of the mouth)                                                                              | <input type="radio"/>            | <input type="radio"/> | <input type="radio"/> | <input type="radio"/> | <input type="radio"/> | <input type="radio"/>         |

Q24 Please provide any additional comments you have on any of the strategies listed above here:

Q25 Please rate how important it is that each of the strategies below is included as part of an 'intervention package' for children with eating and drinking difficulties:

If you feel unable to comment based on your knowledge and / or experience or feel the item is not relevant or not applicable to you, please select 'Not applicable / Not relevant'

|                                                                                                                                                                                                                                                                                                | Not important<br>1    | 2                     | 3                     | 4                     | Important but not essential<br>5 | 6                     | 7                     | 8                     | Essential<br>9        | Not applicable / Not relevant |
|------------------------------------------------------------------------------------------------------------------------------------------------------------------------------------------------------------------------------------------------------------------------------------------------|-----------------------|-----------------------|-----------------------|-----------------------|----------------------------------|-----------------------|-----------------------|-----------------------|-----------------------|-------------------------------|
| <b>Enhancing communication</b>                                                                                                                                                                                                                                                                 |                       |                       |                       |                       |                                  |                       |                       |                       |                       |                               |
| Improving communication between a child and the person feeding them during mealtimes (e.g. offering choices of food to a child; a child using eye pointing or signs or symbols to ask for specific food or drink)                                                                              | <input type="radio"/>            | <input type="radio"/> | <input type="radio"/> | <input type="radio"/> | <input type="radio"/> | <input type="radio"/>         |
| <b>Visual supports</b> Use of pictures, a "countdown clock", or social stories to increase a child's understanding of what happens during mealtimes (e.g. showing a child pictures of what food will be on their plate; showing a child a story to explain what will happen during a mealtime) | <input type="radio"/>            | <input type="radio"/> | <input type="radio"/> | <input type="radio"/> | <input type="radio"/> | <input type="radio"/>         |
| <b>Responding to a child's cues for feeding</b> Helping people to recognise the signs that a child is ready to take another mouthful of food or drink (e.g. looking for breath alterations or repeated swallows from a child to indicate a lack of readiness)                                  | <input type="radio"/>            | <input type="radio"/> | <input type="radio"/> | <input type="radio"/> | <input type="radio"/> | <input type="radio"/>         |
| <b>Pace of feeding</b> Changing the speed at which each mouthful of food or drink is taken by a child (e.g. slowing pace down to prevent overfilling of a child's mouth)                                                                                                                       | <input type="radio"/>            | <input type="radio"/> | <input type="radio"/> | <input type="radio"/> | <input type="radio"/> | <input type="radio"/>         |

Q26 Please provide any additional comments you have on any of the strategies listed above here:

---

Q27 Please rate how important it is that each of the strategies below is included as part of an 'intervention package' for children with eating and drinking difficulties:

If you feel unable to comment based on your knowledge and / or experience or feel the item is not relevant or not applicable to you, please select 'Not applicable / Not relevant'

|                                                                                                                                                  | Not important<br>1    | 2                     | 3                     | 4                     | Important but not essential<br>5 | 6                     | 7                     | 8                     | Essential<br>9        | Not applicable / Not relevant |
|--------------------------------------------------------------------------------------------------------------------------------------------------|-----------------------|-----------------------|-----------------------|-----------------------|----------------------------------|-----------------------|-----------------------|-----------------------|-----------------------|-------------------------------|
| <b>Medication</b> Any medication (e.g. for epilepsy, pain, drooling, tone, gastroesophageal reflux)                                              | <input type="radio"/>            | <input type="radio"/> | <input type="radio"/> | <input type="radio"/> | <input type="radio"/> | <input type="radio"/>         |
| <b>Energy supplements</b> Any energy or calorie supplement given orally or via feeding tube                                                      | <input type="radio"/>            | <input type="radio"/> | <input type="radio"/> | <input type="radio"/> | <input type="radio"/> | <input type="radio"/>         |
| <b>Vitamin or nutritional supplements</b> Any supplements given or changes to a child's diet to increase the vitamins or nutrients in their diet | <input type="radio"/>            | <input type="radio"/> | <input type="radio"/> | <input type="radio"/> | <input type="radio"/> | <input type="radio"/>         |

Q28 Please provide any additional comments you have on any of the strategies listed above here:

---

Q29 Please rate how important it is that each of the strategies below is included as part of an 'intervention package' for children with eating and drinking difficulties:

If you feel unable to comment based on your knowledge and / or experience or feel the item is not relevant or not applicable to you, please select 'Not applicable / Not relevant'

|                                                                                                                                                                                                          | Not important<br>1    | 2                     | 3                     | 4                     | Important but not essential<br>5 | 6                     | 7                     | 8                     | Essential<br>9        | Not applicable / Not relevant |
|----------------------------------------------------------------------------------------------------------------------------------------------------------------------------------------------------------|-----------------------|-----------------------|-----------------------|-----------------------|----------------------------------|-----------------------|-----------------------|-----------------------|-----------------------|-------------------------------|
| <b>Physical support</b>                                                                                                                                                                                  |                       |                       |                       |                       |                                  |                       |                       |                       |                       |                               |
| Giving direct physical support to a child when eating or drinking to improve the movements needed to bite, chew and swallow (e.g. placing a thumb underneath the chin to help a child close their mouth) | <input type="radio"/>            | <input type="radio"/> | <input type="radio"/> | <input type="radio"/> | <input type="radio"/> | <input type="radio"/>         |
| <b>Oral and sensory desensitisation</b>                                                                                                                                                                  |                       |                       |                       |                       |                                  |                       |                       |                       |                       |                               |
| Activities aimed at reducing a child's adverse reactions to different sensory experiences linked to eating and drinking (e.g. face massage; chewing non-food items such as a chewy 'toothbrush')         | <input type="radio"/>            | <input type="radio"/> | <input type="radio"/> | <input type="radio"/> | <input type="radio"/> | <input type="radio"/>         |
| <b>Oral motor exercises</b>                                                                                                                                                                              |                       |                       |                       |                       |                                  |                       |                       |                       |                       |                               |
| Exercises done with a child to improve the control of their mouth, jaw, tongue or lips (e.g. a child moving a non-food item with their tongue; a child sucking through a straw)                          | <input type="radio"/>            | <input type="radio"/> | <input type="radio"/> | <input type="radio"/> | <input type="radio"/> | <input type="radio"/>         |

Q30 Please provide any additional comments you have on any of the strategies listed above here:

---



Q31 Please rate how important it is that each of the strategies below is included as part of an 'intervention package' for children with eating and drinking difficulties:

If you feel unable to comment based on your knowledge and / or experience or feel the item is not relevant or not applicable to you, please select 'Not applicable / Not relevant'

|                                                                                                                                                                                                                                                                                                                                                                    | Not important<br>1    | 2                     | 3                     | 4                     | Important but not essential<br>5 | 6                     | 7                     | 8                     | Essential<br>9        | Not applicable / Not relevant |
|--------------------------------------------------------------------------------------------------------------------------------------------------------------------------------------------------------------------------------------------------------------------------------------------------------------------------------------------------------------------|-----------------------|-----------------------|-----------------------|-----------------------|----------------------------------|-----------------------|-----------------------|-----------------------|-----------------------|-------------------------------|
| <p><b>Graded exposure to new food</b> Activities aimed at gradually exposing a child to new or disliked foods and drinks (e.g. messy play activities involving a child touching new or disliked foods; using small steps towards a child accepting new or disliked foods such as licking the food or putting it in their mouth with no expectation to swallow)</p> | <input type="radio"/>            | <input type="radio"/> | <input type="radio"/> | <input type="radio"/> | <input type="radio"/> | <input type="radio"/>         |
| <p><b>Graded exposure to new textures</b> Activities aimed at gradually introducing a child to more challenging food textures and fluid consistencies (e.g. messy play activities involving a child touching new or disliked textures; using small steps to introduce a child to lumpy food or foods that require chewing)</p>                                     | <input type="radio"/>            | <input type="radio"/> | <input type="radio"/> | <input type="radio"/> | <input type="radio"/> | <input type="radio"/>         |

Q32 Please provide any additional comments you have on any of the strategies listed above here:

---

Q33 Please rate how important it is that each of the strategies below is included as part of an 'intervention package' for children with eating and drinking difficulties:

If you feel unable to comment based on your knowledge and / or experience or feel the item is not relevant or not applicable to you, please select 'Not applicable / Not relevant'

|                                                                                                                                                                                                      | Not important<br>1    | 2                     | 3                     | 4                     | Important but not essential<br>5 | 6                     | 7                     | 8                     | Essential<br>9        | Not applicable / Not relevant |
|------------------------------------------------------------------------------------------------------------------------------------------------------------------------------------------------------|-----------------------|-----------------------|-----------------------|-----------------------|----------------------------------|-----------------------|-----------------------|-----------------------|-----------------------|-------------------------------|
| <p><b>Changing behaviour at mealtimes</b><br/>Strategies to encourage a child to behave appropriately at mealtimes (e.g. a child sitting down ready to eat; a child staying seated for the meal)</p> | <input type="radio"/>            | <input type="radio"/> | <input type="radio"/> | <input type="radio"/> | <input type="radio"/> | <input type="radio"/>         |
| <p><b>Modelling</b> Giving a child the opportunity to learn from others by eating and drinking with them (e.g. sitting a child with other children or family members at mealtimes)</p>               | <input type="radio"/>            | <input type="radio"/> | <input type="radio"/> | <input type="radio"/> | <input type="radio"/> | <input type="radio"/>         |
| <p><b>Training to self-feed</b> Teaching a child to feed themselves (e.g. placing a hand over a child's hand to help guide the food into their mouth)</p>                                            | <input type="radio"/>            | <input type="radio"/> | <input type="radio"/> | <input type="radio"/> | <input type="radio"/> | <input type="radio"/>         |

Q34 Please provide any additional comments you have on any of the strategies listed above here:

---

Q35 Please rate how important it is that each of the strategies below is included as part of an 'intervention package' for children with eating and drinking difficulties:

If you feel unable to comment based on your knowledge and / or experience or feel the item is not relevant or not applicable to you, please select 'Not applicable / Not relevant'

|                                                                                                                                                                                                                                                                                                                                                   | Not important<br>1    | 2                     | 3                     | 4                     | Important but not essential<br>5 | 6                     | 7                     | 8                     | Essential<br>9        | Not applicable / Not relevant |
|---------------------------------------------------------------------------------------------------------------------------------------------------------------------------------------------------------------------------------------------------------------------------------------------------------------------------------------------------|-----------------------|-----------------------|-----------------------|-----------------------|----------------------------------|-----------------------|-----------------------|-----------------------|-----------------------|-------------------------------|
| <b>Support for parents</b>                                                                                                                                                                                                                                                                                                                        |                       |                       |                       |                       |                                  |                       |                       |                       |                       |                               |
| Help for parents around their child's eating and drinking difficulties (e.g. counselling; parent support groups)                                                                                                                                                                                                                                  | <input type="radio"/>            | <input type="radio"/> | <input type="radio"/> | <input type="radio"/> | <input type="radio"/> | <input type="radio"/>         |
| <b>Sharing information</b> Any information shared to help parents and professionals understand a child's difficulties with eating and drinking (e.g. professionals teaching parents and school staff about a child's physical or sensory difficulties; parents helping professionals understand what's important about mealtimes in their family) | <input type="radio"/>            | <input type="radio"/> | <input type="radio"/> | <input type="radio"/> | <input type="radio"/> | <input type="radio"/>         |
| <b>Psychological support for children</b>                                                                                                                                                                                                                                                                                                         |                       |                       |                       |                       |                                  |                       |                       |                       |                       |                               |
| Psychological help for a child (e.g. counselling)                                                                                                                                                                                                                                                                                                 | <input type="radio"/>            | <input type="radio"/> | <input type="radio"/> | <input type="radio"/> | <input type="radio"/> | <input type="radio"/>         |

Q36 Please provide any additional comments you have on any of the strategies listed above here:

Q37 Please provide any additional strategies you think are important or essential here:

## FEEDS Delphi Survey - Round 2

Thank you for taking part in the first round of the FEEDS Delphi survey.

The FEEDS study aims to find out about strategies that parents of young children with developmental difficulties can use at home to help improve children's eating, drinking and swallowing difficulties.

As a reminder, in our study eating, drinking and swallowing difficulties are referred to as "eating and drinking difficulties". The term "strategy" or "strategies" is used to describe what some people might call intervention, therapy, treatment, advice or things that help including self-help. The potential benefits of the strategies are referred to as "outcomes".

This is the **second** round of the survey.

A Delphi survey is a way to seek agreement between different groups of people. It's like having a discussion but through a survey instead of face to face. The Delphi survey will help us to reach conclusions about which outcomes and strategies should be examined in future research.

In this survey, you will be shown how parents and professionals rated items in the first round. As you will see from the graphs, there are high levels of agreement between people for some items and for others there is not agreement. We are asking you to re-rate each outcome and strategy in light of this information and we will see if there is more agreement this time.

Like last time, the survey is divided into 2 sections:

- In part A, we show you how parents and professionals rated a list of **outcomes** related to improved eating and drinking.
- In part B, we show you how parents and professionals rated a list of **strategies** to improve eating and drinking.

**Part A: Outcomes**

For each outcome, you will be shown graphs of how parents and professionals rated that outcome in the previous round. You will then be asked to **re-rate how important you think the outcome is**.

If you feel unable to comment based on your knowledge and / or experience or feel the item is not relevant or not applicable to you, please select 'Not applicable / Not relevant'.

If you would like to add any additional outcomes or comment further on those listed, please do so in the text boxes. If you made comments in the previous round, we will take account of these so you do not need to repeat these comments again on this survey. Thank you.

**General Health**

The graphs below show how important parents and professionals rated 'General Health' as an outcome.

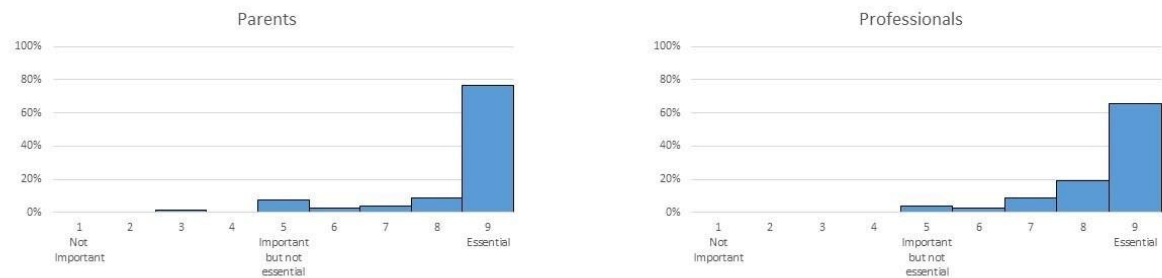

Q1\_1 Now that you know this, please re-rate how important you think this outcome is.

|                                                   | 1                     | 2                     | 3                     | 4                     | 5                           | 6                     | 7                     | 8                     | 9                     |                               |
|---------------------------------------------------|-----------------------|-----------------------|-----------------------|-----------------------|-----------------------------|-----------------------|-----------------------|-----------------------|-----------------------|-------------------------------|
|                                                   | Not important         |                       |                       |                       | Important but not essential |                       |                       |                       | Essential             | Not applicable / Not relevant |
| <b>General health</b><br>A child's overall health | <input type="radio"/>       | <input type="radio"/> | <input type="radio"/> | <input type="radio"/> | <input type="radio"/> | <input type="radio"/>         |

Q1\_2 Please provide any additional comments you have about this outcome here:

---

### Weight

The graphs below show how important parents and professionals rated 'Weight' as an outcome.

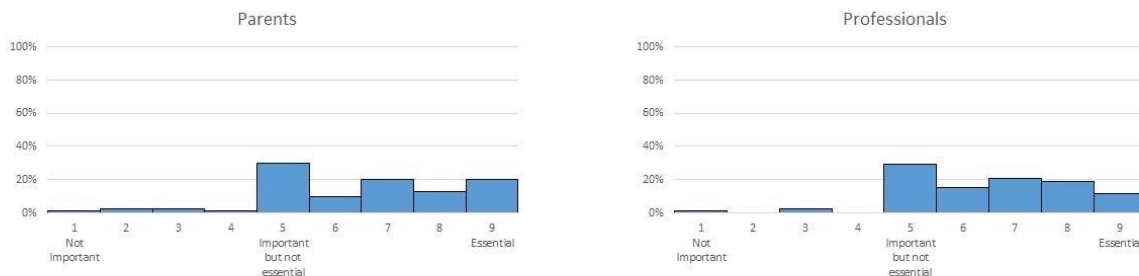

Q2\_1 Now that you know this, please re-rate how important you think this outcome is.

|                         | 1                     | 2                     | 3                     | 4                     | 5                           | 6                     | 7                     | 8                     | 9                     |                               |
|-------------------------|-----------------------|-----------------------|-----------------------|-----------------------|-----------------------------|-----------------------|-----------------------|-----------------------|-----------------------|-------------------------------|
|                         | Not important         |                       |                       |                       | Important but not essential |                       |                       |                       | Essential             | Not applicable / Not relevant |
| <b>Weight</b>           |                       |                       |                       |                       |                             |                       |                       |                       |                       |                               |
| How much a child weighs | <input type="radio"/>       | <input type="radio"/> | <input type="radio"/> | <input type="radio"/> | <input type="radio"/> | <input type="radio"/>         |

Q2\_2 Please provide any additional comments you have about this outcome here:

---

### Height

The graphs below show how important parents and professionals rated 'Height' as an outcome.

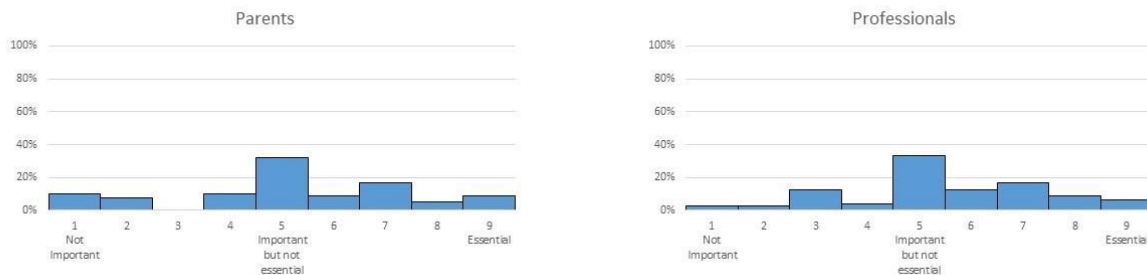

Q3\_1 Now that you know this, please re-rate how important you think this outcome is.

|                     | 1                     | 2                     | 3                     | 4                     | 5                           | 6                     | 7                     | 8                     | 9                     |                               |
|---------------------|-----------------------|-----------------------|-----------------------|-----------------------|-----------------------------|-----------------------|-----------------------|-----------------------|-----------------------|-------------------------------|
|                     | Not important         |                       |                       |                       | Important but not essential |                       |                       |                       | Essential             | Not applicable / Not relevant |
| <b>Height</b>       |                       |                       |                       |                       |                             |                       |                       |                       |                       |                               |
| How tall a child is | <input type="radio"/>       | <input type="radio"/> | <input type="radio"/> | <input type="radio"/> | <input type="radio"/> | <input type="radio"/>         |

Q3\_2 Please provide any additional comments you have about this outcome here:

---

**Growth**

The graphs below show how important parents and professionals rated 'Growth' as an outcome.

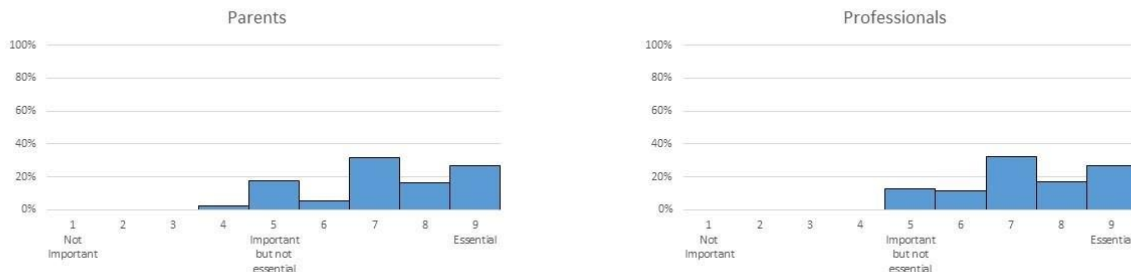

Q4\_1 Now that you know this, please re-rate how important you think this outcome is.

|                                                                            | 1                     | 2                     | 3                     | 4                     | 5                           | 6                     | 7                     | 8                     | 9                     | Not applicable / Not relevant |
|----------------------------------------------------------------------------|-----------------------|-----------------------|-----------------------|-----------------------|-----------------------------|-----------------------|-----------------------|-----------------------|-----------------------|-------------------------------|
|                                                                            | Not important         |                       |                       |                       | Important but not essential |                       |                       |                       | Essential             |                               |
| <b>Growth</b><br>A change in a child's growth, including height and weight | <input type="radio"/>       | <input type="radio"/> | <input type="radio"/> | <input type="radio"/> | <input type="radio"/> | <input type="radio"/>         |

Q4\_2 Please provide any additional comments you have about this outcome here:

---



**Nutrition**

The graphs below show how important parents and professionals rated 'Nutrition' as an outcome.

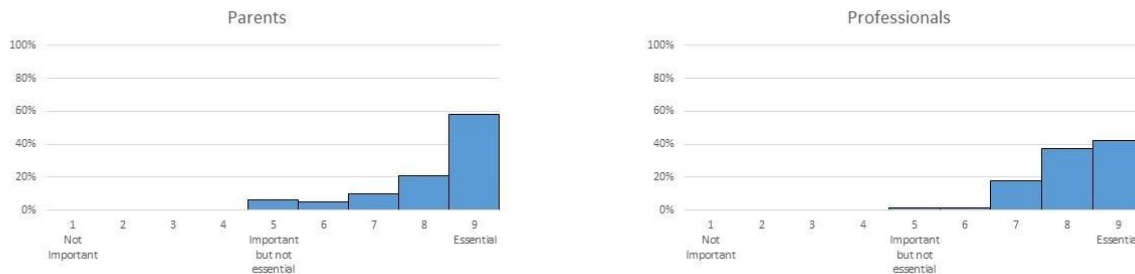

Q5\_1 Now that you know this, please re-rate how important you think this outcome is.

|                                                            | 1                     | 2                     | 3                     | 4                     | 5                           | 6                     | 7                     | 8                     | 9                     |                               |
|------------------------------------------------------------|-----------------------|-----------------------|-----------------------|-----------------------|-----------------------------|-----------------------|-----------------------|-----------------------|-----------------------|-------------------------------|
|                                                            | Not important         |                       |                       |                       | Important but not essential |                       |                       |                       | Essential             | Not applicable / Not relevant |
| <b>Nutrition</b>                                           |                       |                       |                       |                       |                             |                       |                       |                       |                       |                               |
| A child's level of energy and nutrients for healthy growth | <input type="radio"/>       | <input type="radio"/> | <input type="radio"/> | <input type="radio"/> | <input type="radio"/> | <input type="radio"/>         |

Q5\_2 Please provide any additional comments you have about this outcome here:

---

### Child's Enjoyment of Mealtimes

The graphs below show how important parents and professionals rated 'Child's Enjoyment of Mealtimes' as an outcome.

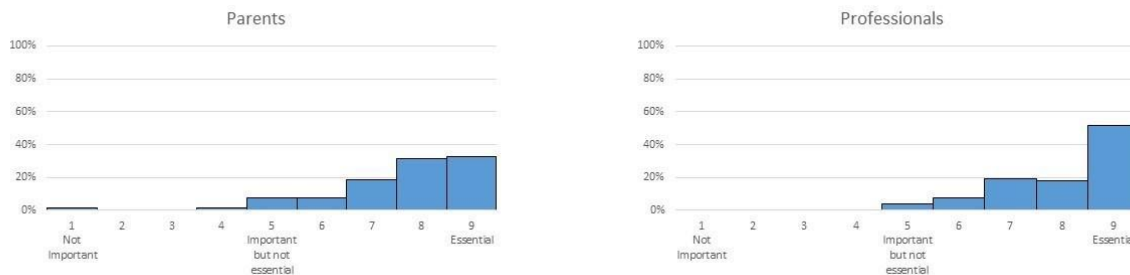

Q6\_1 Now that you know this, please re-rate how important you think this outcome is.

|                                       | 1                     | 2                     | 3                     | 4                     | 5                           | 6                     | 7                     | 8                     | 9                     | Not applicable / Not relevant |
|---------------------------------------|-----------------------|-----------------------|-----------------------|-----------------------|-----------------------------|-----------------------|-----------------------|-----------------------|-----------------------|-------------------------------|
|                                       | Not important         |                       |                       |                       | Important but not essential |                       |                       |                       | Essential             |                               |
| <b>Child's enjoyment of mealtimes</b> | <input type="radio"/>       | <input type="radio"/> | <input type="radio"/> | <input type="radio"/> | <input type="radio"/> | <input type="radio"/>         |

Q6\_2 Please provide any additional comments you have about this outcome here:

---

**Parent or Caregiver's Enjoyment of Mealtimes**

The graphs below show how important parents and professionals rated 'Parent or Caregiver's Enjoyment of Mealtimes' as an outcome.

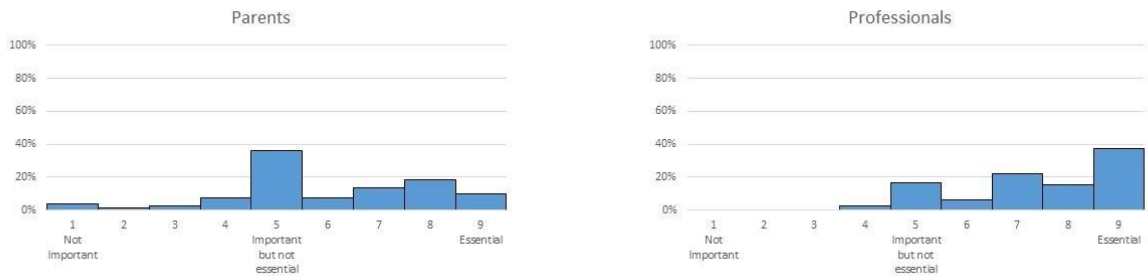

Q7\_1 Now that you know this, please re-rate how important you think this outcome is.

|                                                     | Not important<br>1    | 2                     | 3                     | 4                     | Important but not essential<br>5 | 6                     | 7                     | 8                     | Essential<br>9        | Not applicable / Not relevant |
|-----------------------------------------------------|-----------------------|-----------------------|-----------------------|-----------------------|----------------------------------|-----------------------|-----------------------|-----------------------|-----------------------|-------------------------------|
| <b>Parent or caregiver's enjoyment of mealtimes</b> | <input type="radio"/>            | <input type="radio"/> | <input type="radio"/> | <input type="radio"/> | <input type="radio"/> | <input type="radio"/>         |

Q7\_2 Please provide any additional comments you have about this outcome here:

---

**Quality of Life of Child**

The graphs below show how important parents and professionals rated 'Quality of Life of Child' as an outcome.

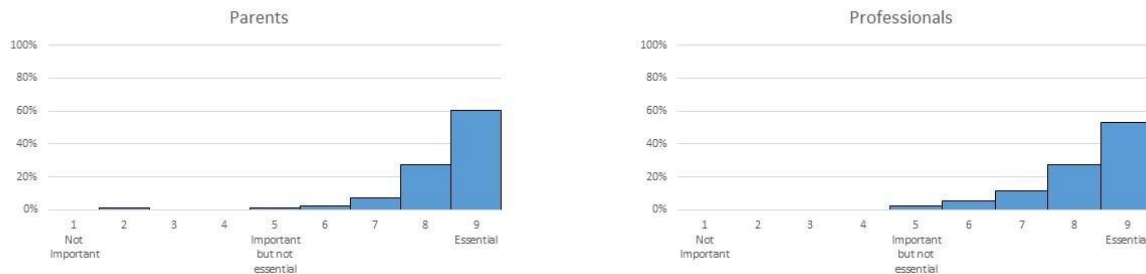

Q8\_1 Now that you know this, please re-rate how important you think this outcome is.

|                                              | 1                     | 2                     | 3                     | 4                     | 5                           | 6                     | 7                     | 8                     | 9                     |                               |
|----------------------------------------------|-----------------------|-----------------------|-----------------------|-----------------------|-----------------------------|-----------------------|-----------------------|-----------------------|-----------------------|-------------------------------|
|                                              | Not important         |                       |                       |                       | Important but not essential |                       |                       |                       | Essential             | Not applicable / Not relevant |
| <b>Quality of life of child</b>              |                       |                       |                       |                       |                             |                       |                       |                       |                       |                               |
| How satisfied a child feels about their life | <input type="radio"/>       | <input type="radio"/> | <input type="radio"/> | <input type="radio"/> | <input type="radio"/> | <input type="radio"/>         |

Q8\_2 Please provide any additional comments you have about this outcome here:

---

### Quality of Life of Family

The graphs below show how important parents and professionals rated 'Quality of Life of Family' as an outcome.

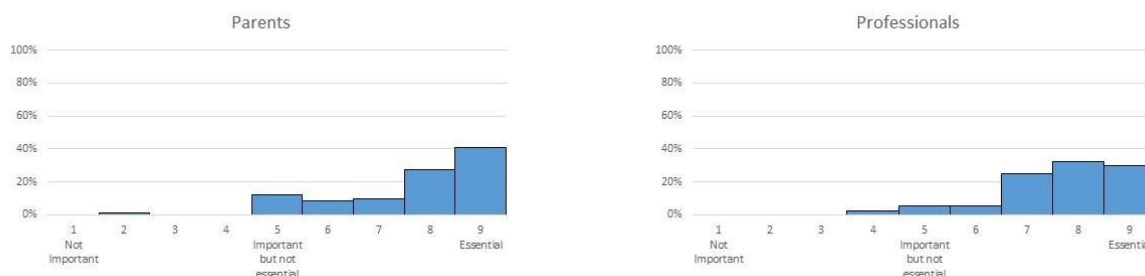

Q9\_1 Now that you know this, please re-rate how important you think this outcome is.

|                                                                 | 1                     | 2                     | 3                     | 4                     | 5                           | 6                     | 7                     | 8                     | 9                     |                               |
|-----------------------------------------------------------------|-----------------------|-----------------------|-----------------------|-----------------------|-----------------------------|-----------------------|-----------------------|-----------------------|-----------------------|-------------------------------|
|                                                                 | Not important         |                       |                       |                       | Important but not essential |                       |                       |                       | Essential             | Not applicable / Not relevant |
| <b>Quality of life of family</b>                                |                       |                       |                       |                       |                             |                       |                       |                       |                       |                               |
| How satisfied other family members feel about their (own) lives | <input type="radio"/>       | <input type="radio"/> | <input type="radio"/> | <input type="radio"/> | <input type="radio"/> | <input type="radio"/>         |

Q9\_2 Please provide any additional comments you have about this outcome here:

---

**Mental Health of Parent or Caregiver**

The graphs below show how important parents and professionals rated 'Mental Health of Parent or Caregiver' as an outcome.

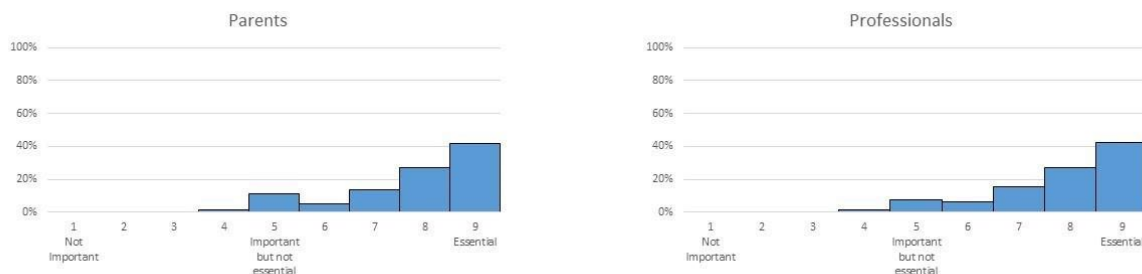

Q10\_1 Now that you know this, please re-rate how important you think this outcome is.

|                                                                                                    | 1                     | 2                     | 3                     | 4                     | 5                           | 6                     | 7                     | 8                     | 9                     | Not applicable / Not relevant |
|----------------------------------------------------------------------------------------------------|-----------------------|-----------------------|-----------------------|-----------------------|-----------------------------|-----------------------|-----------------------|-----------------------|-----------------------|-------------------------------|
|                                                                                                    | Not important         |                       |                       |                       | Important but not essential |                       |                       |                       | Essential             |                               |
| <b>Mental health of parent or caregiver</b><br>A parent / caregiver's mood and emotional wellbeing | <input type="radio"/>       | <input type="radio"/> | <input type="radio"/> | <input type="radio"/> | <input type="radio"/> | <input type="radio"/>         |

Q10\_2 Please provide any additional comments you have about this outcome here:

---

**Safety**

The graphs below show how important parents and professionals rated 'Safety' as an outcome.

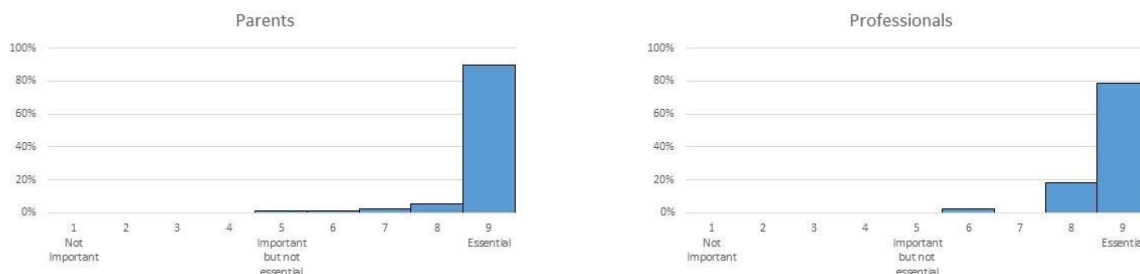

Q11\_1 Now that you know this, please re-rate how important you think this outcome is.

|                                                                                          | 1<br>Not important    | 2 (2)                 | 3 (3)                 | 4 (4)                 | 5 (5)<br>Important but not essential | 6 (6)                 | 7 (7)                 | 8 (8)                 | 9 (9)<br>Essential    | 10<br>Not applicable / Not relevant |
|------------------------------------------------------------------------------------------|-----------------------|-----------------------|-----------------------|-----------------------|--------------------------------------|-----------------------|-----------------------|-----------------------|-----------------------|-------------------------------------|
| <b>Safety</b><br>A child's ability to eat and drink safely without choking or aspirating | <input type="radio"/>                | <input type="radio"/> | <input type="radio"/> | <input type="radio"/> | <input type="radio"/> | <input type="radio"/>               |

Q11\_2 Please provide any additional comments you have about this outcome here:

---

**Oral Motor Control**

The graphs below show how important parents and professionals rated 'Oral Motor Control' as an outcome.

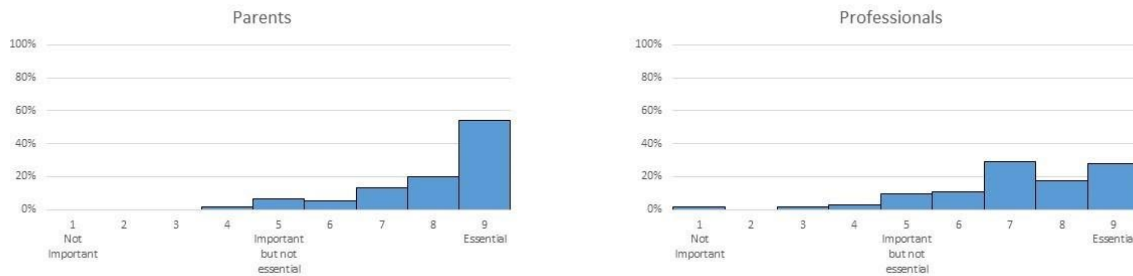

Q12\_1 Now that you know this, please re-rate how important you think this outcome is.

|                                                                                                                                                     | 1                     | 2                     | 3                     | 4                     | 5                           | 6                     | 7                     | 8                     | 9                     |                               |
|-----------------------------------------------------------------------------------------------------------------------------------------------------|-----------------------|-----------------------|-----------------------|-----------------------|-----------------------------|-----------------------|-----------------------|-----------------------|-----------------------|-------------------------------|
|                                                                                                                                                     | Not important         |                       |                       |                       | Important but not essential |                       |                       |                       | Essential             | Not applicable / Not relevant |
| <p><b>Oral motor control</b><br/>                     A child's ability to control the movement of their mouth, jaw, tongue or lips and swallow</p> | <input type="radio"/>       | <input type="radio"/> | <input type="radio"/> | <input type="radio"/> | <input type="radio"/> | <input type="radio"/>         |

Q12\_2 Please provide any additional comments you have about this outcome here:

---



**Efficiency**

The graphs below show how important parents and professionals rated 'Efficiency' as an outcome.

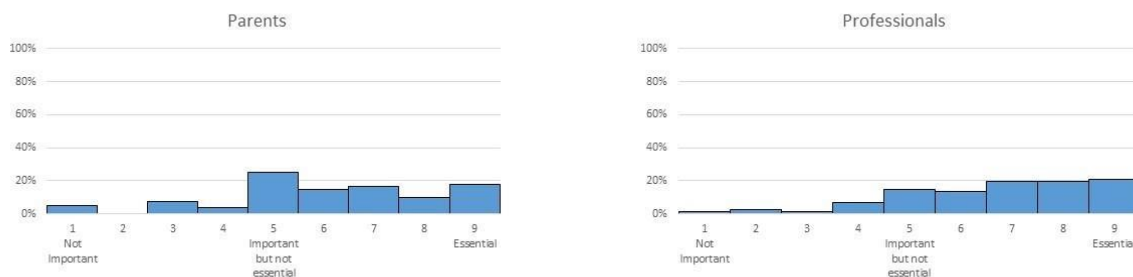

Q13\_1 Now that you know this, please re-rate how important you think this outcome is.

|                                                                              | 1                     | 2                     | 3                     | 4                     | 5                           | 6                     | 7                     | 8                     | 9                     | Not applicable / Not relevant |
|------------------------------------------------------------------------------|-----------------------|-----------------------|-----------------------|-----------------------|-----------------------------|-----------------------|-----------------------|-----------------------|-----------------------|-------------------------------|
|                                                                              | Not important         |                       |                       |                       | Important but not essential |                       |                       |                       | Essential             |                               |
| <b>Efficiency</b><br>A child's ability to eat and drink at a reasonable pace | <input type="radio"/>       | <input type="radio"/> | <input type="radio"/> | <input type="radio"/> | <input type="radio"/> | <input type="radio"/>         |

Q13\_2 Please provide any additional comments you have about this outcome here:

---

### Independence

The graphs below show how important parents and professionals rated 'Independence' as an outcome.

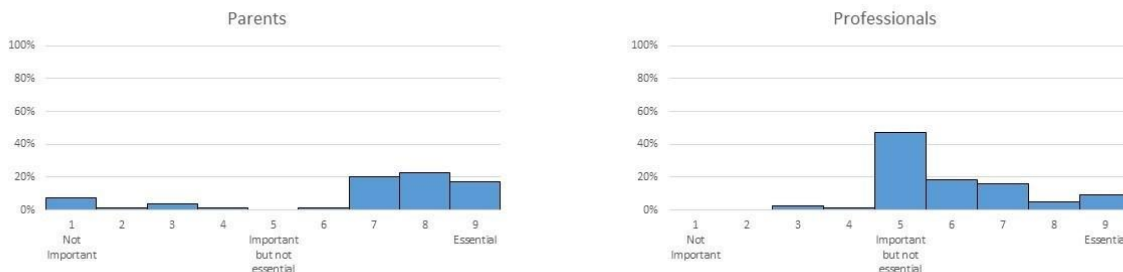

Q14\_1 Now that you know this, please re-rate how important you think this outcome is.

|                                                             | 1                     | 2                     | 3                     | 4                     | 5                           | 6                     | 7                     | 8                     | 9                     |                               |
|-------------------------------------------------------------|-----------------------|-----------------------|-----------------------|-----------------------|-----------------------------|-----------------------|-----------------------|-----------------------|-----------------------|-------------------------------|
|                                                             | Not important         |                       |                       |                       | Important but not essential |                       |                       |                       | Essential             | Not applicable / Not relevant |
| <b>Independence</b><br>A child's ability to feed themselves | <input type="radio"/>       | <input type="radio"/> | <input type="radio"/> | <input type="radio"/> | <input type="radio"/> | <input type="radio"/>         |

Q14\_2 Please provide any additional comments you have about this outcome here:

---

**Variety**

The graphs below show how important parents and professionals rated 'Variety' as an outcome.

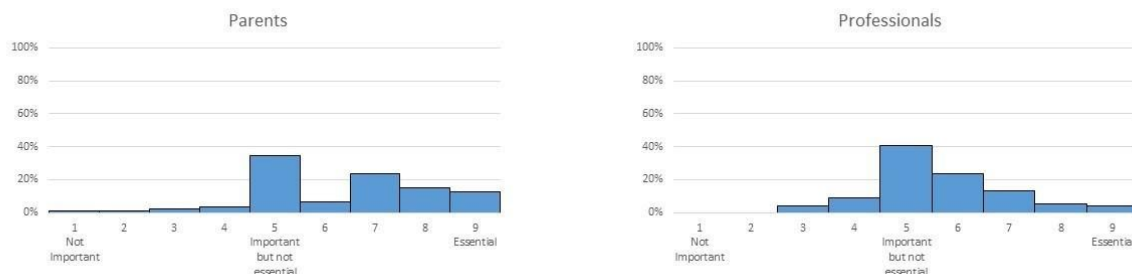

Q15\_1 Now that you know this, please re-rate how important you think this outcome is.

|                                                                        | 1                     | 2                     | 3                     | 4                     | 5                           | 6                     | 7                     | 8                     | 9                     |                               |
|------------------------------------------------------------------------|-----------------------|-----------------------|-----------------------|-----------------------|-----------------------------|-----------------------|-----------------------|-----------------------|-----------------------|-------------------------------|
|                                                                        | Not important         |                       |                       |                       | Important but not essential |                       |                       |                       | Essential             | Not applicable / Not relevant |
| <b>Variety</b><br>The range of foods or liquids a child eats or drinks | <input type="radio"/>       | <input type="radio"/> | <input type="radio"/> | <input type="radio"/> | <input type="radio"/> | <input type="radio"/>         |

Q15\_2 Please provide any additional comments you have about this outcome here:

---

**Amount**

The graphs below show how important parents and professionals rated 'Amount' as an outcome.

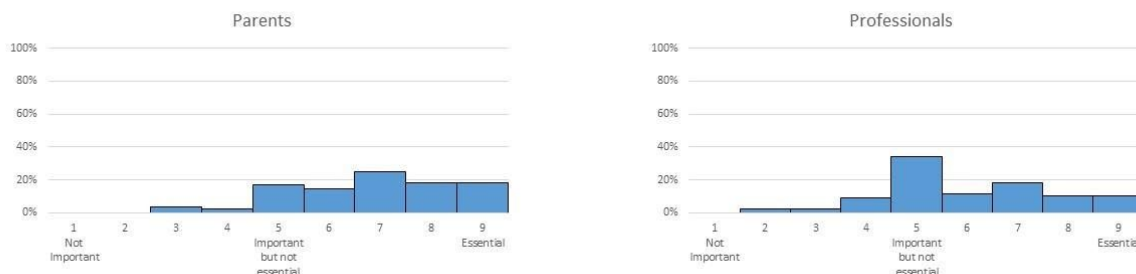

Q16\_1 Now that you know this, please re-rate how important you think this outcome is.

|                                                             | 1                     | 2                     | 3                     | 4                     | 5                           | 6                     | 7                     | 8                     | 9                     |                               |
|-------------------------------------------------------------|-----------------------|-----------------------|-----------------------|-----------------------|-----------------------------|-----------------------|-----------------------|-----------------------|-----------------------|-------------------------------|
|                                                             | Not important         |                       |                       |                       | Important but not essential |                       |                       |                       | Essential             | Not applicable / Not relevant |
| <b>Amount</b>                                               |                       |                       |                       |                       |                             |                       |                       |                       |                       |                               |
| The amount of food or liquid a child eats or drinks per day | <input type="radio"/>       | <input type="radio"/> | <input type="radio"/> | <input type="radio"/> | <input type="radio"/> | <input type="radio"/>         |

Q16\_2 Please provide any additional comments you have about this outcome here:

---

### Appetite

The graphs below show how important parents and professionals rated 'Appetite' as an outcome.

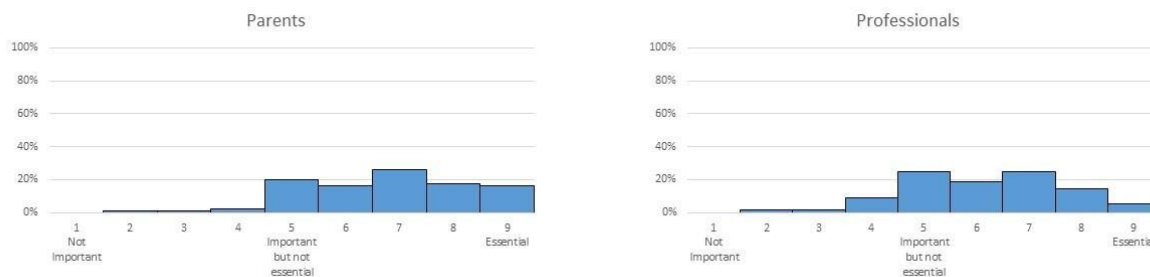

Q17\_1 Now that you know this, please re-rate how important you think this outcome is.

|                                                                                   | 1                     | 2                     | 3                     | 4                     | 5                     | 6                     | 7                     | 8                     | 9                     | Not applicable / Not relevant |
|-----------------------------------------------------------------------------------|-----------------------|-----------------------|-----------------------|-----------------------|-----------------------|-----------------------|-----------------------|-----------------------|-----------------------|-------------------------------|
| <p><b>Appetite</b><br/>A child's level of hunger and desire for food or drink</p> | <input type="radio"/>         |

Q17\_2 Please provide any additional comments you have about this outcome here:

---

**Mealtime Behaviour**

The graphs below show how important parents and professionals rated 'Mealtime Behaviour' as an outcome.

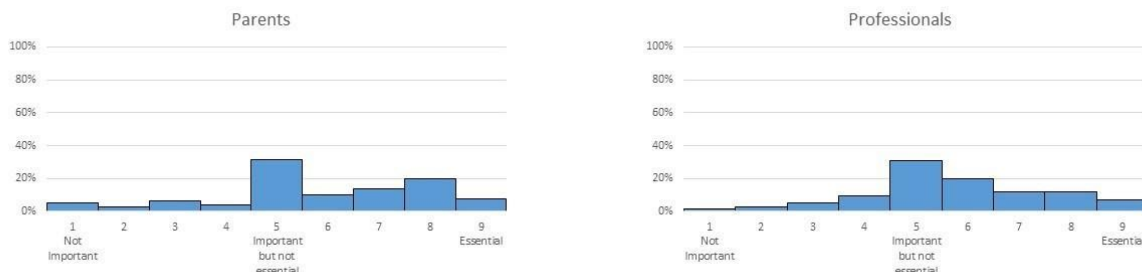

Q18\_1 Now that you know this, please re-rate how important you think this outcome is.

|                                             | 1                     | 2                     | 3                     | 4                     | 5                           | 6                     | 7                     | 8                     | 9                     | Not applicable / Not relevant |
|---------------------------------------------|-----------------------|-----------------------|-----------------------|-----------------------|-----------------------------|-----------------------|-----------------------|-----------------------|-----------------------|-------------------------------|
|                                             | Not important         |                       |                       |                       | Important but not essential |                       |                       |                       | Essential             |                               |
| <b>Mealtime behaviour</b>                   |                       |                       |                       |                       |                             |                       |                       |                       |                       |                               |
| A child behaving appropriately during meals | <input type="radio"/>       | <input type="radio"/> | <input type="radio"/> | <input type="radio"/> | <input type="radio"/> | <input type="radio"/>         |

Q18\_2 Please provide any additional comments you have about this outcome here:

---

### Mealtime Interaction

The graphs below show how important parents and professionals rated 'Mealtime Interaction' as an outcome.

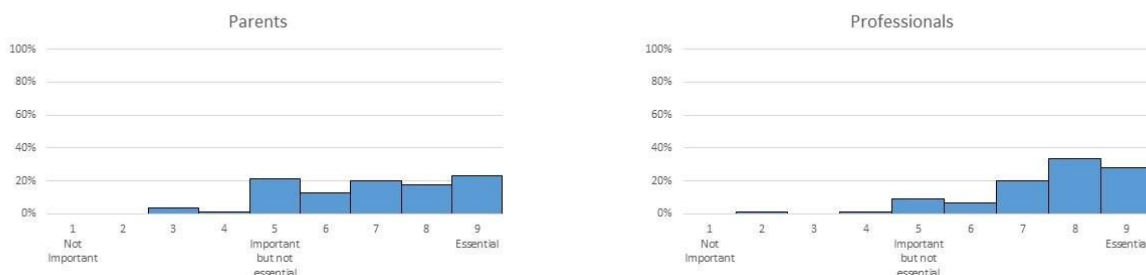

Q19\_1 Now that you know this, please re-rate how important you think this outcome is.

|                                                                                                         | 1                     | 2                     | 3                     | 4                     | 5                           | 6                     | 7                     | 8                     | 9                     | Not applicable / Not relevant |
|---------------------------------------------------------------------------------------------------------|-----------------------|-----------------------|-----------------------|-----------------------|-----------------------------|-----------------------|-----------------------|-----------------------|-----------------------|-------------------------------|
|                                                                                                         | Not important         |                       |                       |                       | Important but not essential |                       |                       |                       | Essential             |                               |
| <b>Mealtime interaction</b><br>The interaction between a child and the person feeding them at mealtimes | <input type="radio"/>       | <input type="radio"/> | <input type="radio"/> | <input type="radio"/> | <input type="radio"/> | <input type="radio"/>         |

Q19\_2 Please provide any additional comments you have about this outcome here:

---

### Social Participation

The graphs below show how important parents and professionals rated 'Social Participation' as an outcome.

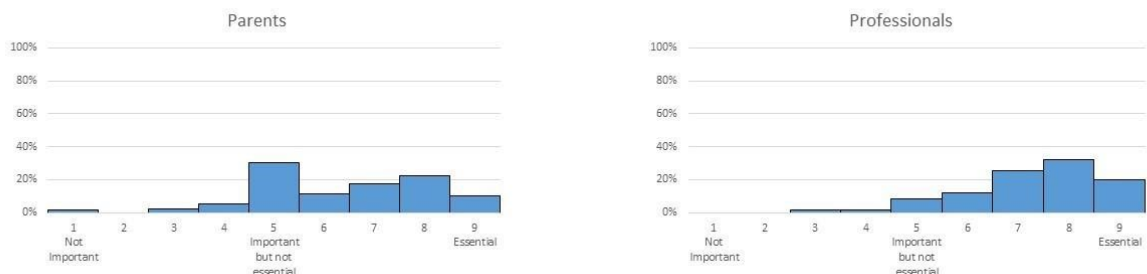

Q20\_1 Now that you know this, please re-rate how important you think this outcome is.

|                                                                                                      | 1                     | 2                     | 3                     | 4                     | 5                           | 6                     | 7                     | 8                     | 9                     |                               |
|------------------------------------------------------------------------------------------------------|-----------------------|-----------------------|-----------------------|-----------------------|-----------------------------|-----------------------|-----------------------|-----------------------|-----------------------|-------------------------------|
|                                                                                                      | Not important         |                       |                       |                       | Important but not essential |                       |                       |                       | Essential             | Not applicable / Not relevant |
| <b>Social participation</b><br>A child's involvement in social activities around eating and drinking | <input type="radio"/>       | <input type="radio"/> | <input type="radio"/> | <input type="radio"/> | <input type="radio"/> | <input type="radio"/>         |

Q20\_2 Please provide any additional comments you have about this outcome here:

---



### Child's Understanding

The graphs below show how important parents and professionals rated 'Child's Understanding' as an outcome.

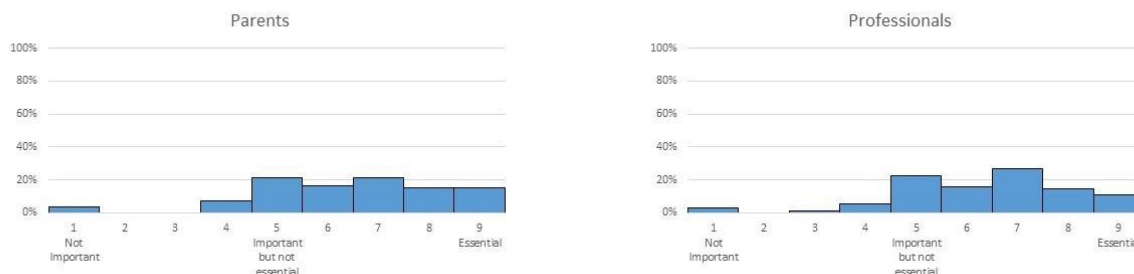

Q21\_1 Now that you know this, please re-rate how important you think this outcome is.

|                                                                                             | 1                     | 2                     | 3                     | 4                     | 5                           | 6                     | 7                     | 8                     | 9                     | Not applicable / Not relevant |
|---------------------------------------------------------------------------------------------|-----------------------|-----------------------|-----------------------|-----------------------|-----------------------------|-----------------------|-----------------------|-----------------------|-----------------------|-------------------------------|
|                                                                                             | Not important         |                       |                       |                       | Important but not essential |                       |                       |                       | Essential             |                               |
| <b>Child's understanding</b><br>A child's understanding of mealtime activities and routines | <input type="radio"/>       | <input type="radio"/> | <input type="radio"/> | <input type="radio"/> | <input type="radio"/> | <input type="radio"/>         |

Q21\_2 Please provide any additional comments you have about this outcome here:

---

**Parent or Caregiver's Understanding**

The graphs below show how important parents and professionals rated 'Parent or Caregiver's Understanding' as an outcome.

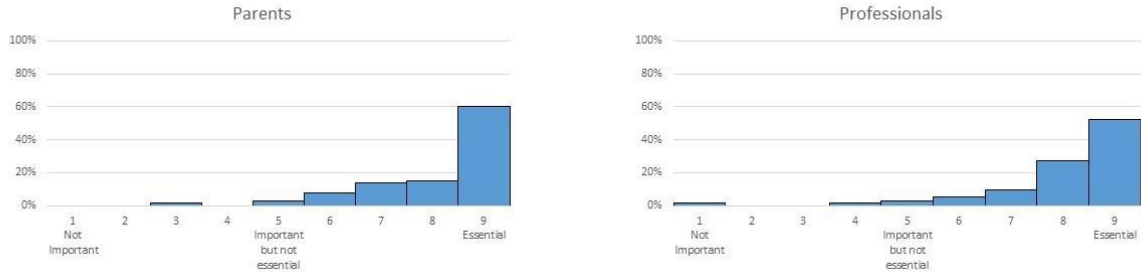

Q22\_1 Now that you know this, please re-rate how important you think this outcome is.

|                                                                                                                                   | 1                     | 2                     | 3                     | 4                     | 5                                | 6                     | 7                     | 8                     | 9                     | Not applicable / Not relevant |
|-----------------------------------------------------------------------------------------------------------------------------------|-----------------------|-----------------------|-----------------------|-----------------------|----------------------------------|-----------------------|-----------------------|-----------------------|-----------------------|-------------------------------|
|                                                                                                                                   | Not important         |                       |                       |                       | Important but not essential      |                       |                       |                       | Essential             |                               |
| <b>Parent or caregiver's understanding</b><br>A parent or caregiver's insight into their child's eating and drinking difficulties | <input type="radio"/> | <input type="radio"/> | <input type="radio"/> | <input type="radio"/> | <input checked="" type="radio"/> | <input type="radio"/>         |

Q22\_2 Please provide any additional comments you have about this outcome here:

---

Q23

Please provide any additional outcomes you think are important or essential here:

If you provided any additional outcomes in the previous round, we will take account of these so you do not need to repeat these comments again on this survey. Thank you.

---

1  
2  
3 **Part B: Strategies**  
4

5 For each strategy, you will be shown graphs of how parents and professionals rated that  
6 strategy in the previous round. You will then be asked to **re-rate how important you think**  
7 **it is that the strategy is included in an 'intervention package' for children with eating**  
8 **and drinking difficulties.**  
9

10  
11 If you feel unable to comment based on your knowledge and / or experience or feel the item  
12 is not relevant or not applicable to you, please select 'Not applicable / Not relevant'.  
13  
14

15 If you would like to add any additional strategies or comment further on those listed, please  
16 do so in the text boxes. If you made comments in the previous round, we will take account  
17 of these so you do not need to repeat these comments again on this survey. Thank you.  
18  
19  
20  
21  
22  
23  
24  
25  
26  
27  
28  
29  
30  
31  
32  
33  
34  
35  
36  
37  
38  
39  
40  
41  
42  
43  
44  
45  
46  
47  
48  
49  
50  
51  
52  
53  
54  
55  
56  
57  
58  
59  
60

### Modifying Environment

The graphs below show how important parents and professionals rated 'Modifying Environment' as a strategy to be included as part of an 'intervention package' for children with eating and drinking difficulties.

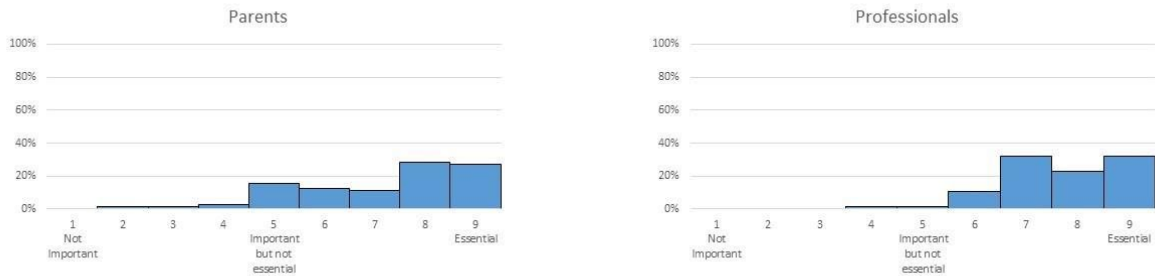

Q24\_1 Now that you know this, please re-rate how important you think it is that this strategy is included in an 'intervention package' for children with eating and drinking difficulties.

|                                                                                                                                                                                                           | 1                     | 2                     | 3                     | 4                     | 5                     | 6                     | 7                     | 8                     | Essential             | Not applicable / Not relevant |
|-----------------------------------------------------------------------------------------------------------------------------------------------------------------------------------------------------------|-----------------------|-----------------------|-----------------------|-----------------------|-----------------------|-----------------------|-----------------------|-----------------------|-----------------------|-------------------------------|
| <b>Modifying environment</b><br>Changing the physical or social setting at mealtimes (e.g. reducing distractions such as levels of noise; using distractions to reduce a child's attention on their food) | <input type="radio"/>         |

Q24\_2 Please provide any additional comments you have about this strategy here:

---

### Positioning

The graphs below show how important parents and professionals rated 'Positioning' as a strategy to be included as part of an 'intervention package' for children with eating and drinking difficulties.

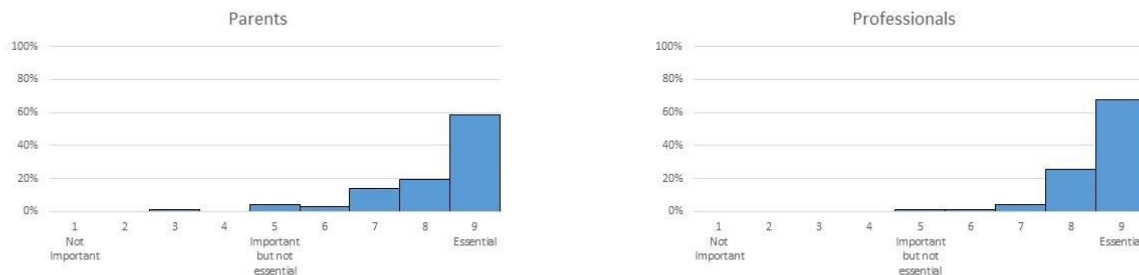

Q25\_1 Now that you know this, please re-rate how important you think this strategy is.

|                                                                                                                                                                                | 1                     | 2                     | 3                     | 4                     | 5                           | 6                     | 7                     | 8                     | 9                     | Not applicable / Not relevant |
|--------------------------------------------------------------------------------------------------------------------------------------------------------------------------------|-----------------------|-----------------------|-----------------------|-----------------------|-----------------------------|-----------------------|-----------------------|-----------------------|-----------------------|-------------------------------|
|                                                                                                                                                                                | Not important         |                       |                       |                       | Important but not essential |                       |                       |                       | Essential             |                               |
| <b>Positioning</b><br>Ensuring a child is in the best position to eat and drink food safely and efficiently (e.g. a child sitting upright; providing support for head control) | <input type="radio"/>       | <input type="radio"/> | <input type="radio"/> | <input type="radio"/> | <input type="radio"/> | <input type="radio"/>         |

Q25\_2 Please provide any additional comments you have about this strategy here:

---

### Modifying Equipment

The graphs below show how important parents and professionals rated 'Modifying Equipment' as a strategy to be included as part of an 'intervention package' for children with eating and drinking difficulties.

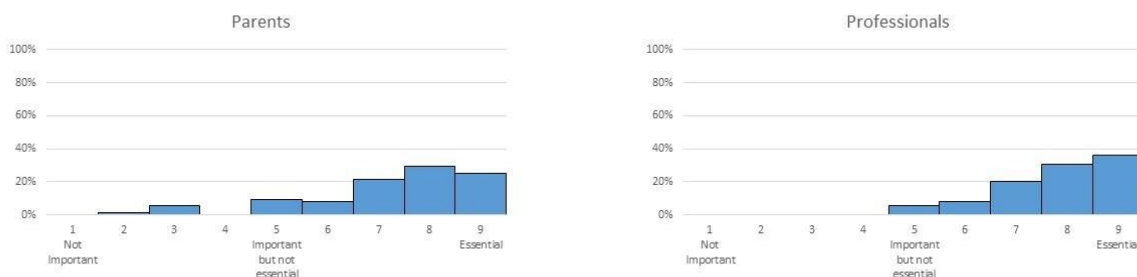

Q26\_1 Now that you know this, please re-rate how important you think this strategy is.

|                                                                                                                        | 1                     | 2                     | 3                     | 4                     | 5                     | 6                     | 7                     | 8                     | 9                     | Not applicable / Not relevant |
|------------------------------------------------------------------------------------------------------------------------|-----------------------|-----------------------|-----------------------|-----------------------|-----------------------|-----------------------|-----------------------|-----------------------|-----------------------|-------------------------------|
| <b>Modifying equipment</b><br>Using different spoons, forks, plates, cups, bottles etc (e.g. doidy cup; plastic spoon) | <input type="radio"/>         |

Q26\_2 Please provide any additional comments you have about this strategy here:

---

### Scheduling of meals

The graphs below show how important parents and professionals rated 'Scheduling of Meals' as a strategy to be included as part of an 'intervention package' for children with eating and drinking difficulties.

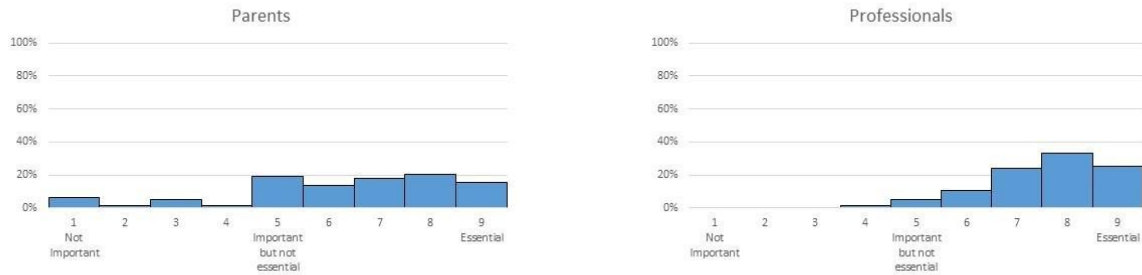

Q27\_1 Now that you know this, please re-rate how important you think this strategy is.

|                                                                                                                                                                                                                         | 1                     | 2                     | 3                     | 4                     | 5                           | 6                     | 7                     | 8                     | 9                     |                               |
|-------------------------------------------------------------------------------------------------------------------------------------------------------------------------------------------------------------------------|-----------------------|-----------------------|-----------------------|-----------------------|-----------------------------|-----------------------|-----------------------|-----------------------|-----------------------|-------------------------------|
|                                                                                                                                                                                                                         | Not important         |                       |                       |                       | Important but not essential |                       |                       |                       | Essential             | Not applicable / Not relevant |
| <b>Scheduling of meals</b> Setting the timing of mealtimes to encourage a child's appetite and establish a mealtime routine (e.g. spreading meals / snacks throughout the day; setting a 30 minute limit for mealtimes) | <input type="radio"/>       | <input type="radio"/> | <input type="radio"/> | <input type="radio"/> | <input type="radio"/> | <input type="radio"/>         |

Q27\_2 Please provide any additional comments you have about this strategy here:

---

### Modifying Consistency of Food or Drink

The graphs below show how important parents and professionals rated 'Modifying Consistency of Food or Drink' as a strategy to be included as part of an 'intervention package' for children with eating and drinking difficulties.

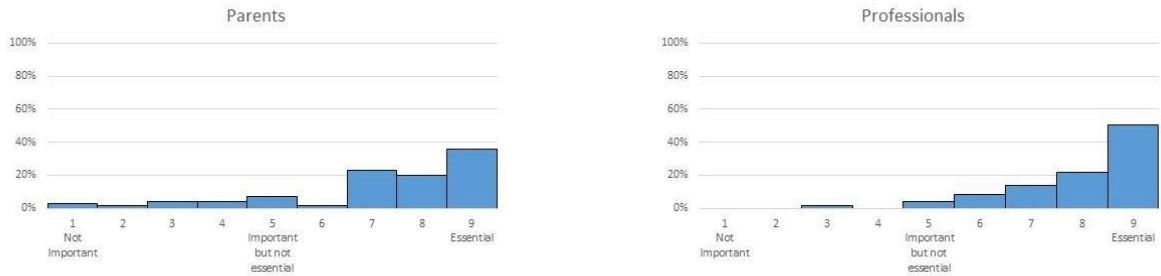

Q28\_1 Now that you know this, please re-rate how important you think this strategy is.

|                                                                                                                                                     | 1                     | 2                     | 3                     | 4                     | 5                           | 6                     | 7                     | 8                     | 9                     | Not applicable / Not relevant |
|-----------------------------------------------------------------------------------------------------------------------------------------------------|-----------------------|-----------------------|-----------------------|-----------------------|-----------------------------|-----------------------|-----------------------|-----------------------|-----------------------|-------------------------------|
|                                                                                                                                                     | Not important         |                       |                       |                       | Important but not essential |                       |                       |                       | Essential             |                               |
| <b>Modifying consistency of food or drink</b><br>Changing the consistency of a child's food or drink (e.g. pureeing food; thickening food or drink) | <input type="radio"/>       | <input type="radio"/> | <input type="radio"/> | <input type="radio"/> | <input type="radio"/> | <input type="radio"/>         |

Q28\_2 Please provide any additional comments you have about this strategy here:

---



### Modifying Other Aspects of Food or Drink

The graphs below show how important parents and professionals rated 'Modifying Other Aspects of Food or Drink' as a strategy to be included as part of an 'intervention package' for children with eating and drinking difficulties.

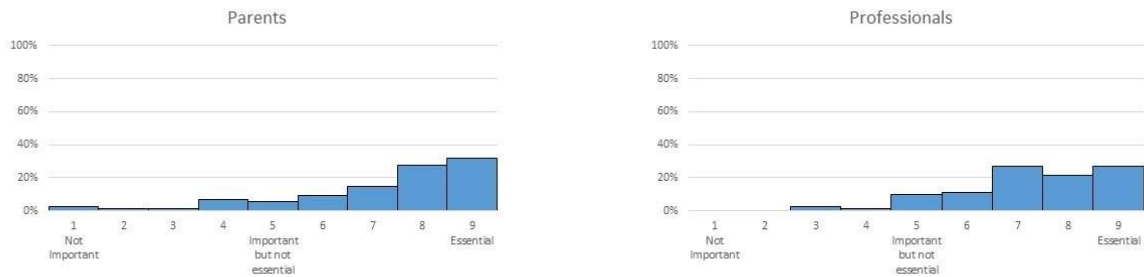

Q29\_1 Now that you know this, please re-rate how important you think this strategy is.

|                                                                                                                                                                                                                                                            | 1                     | 2                     | 3                     | 4                           | 5                     | 6                     | 7                     | 8                     | 9                     | Not applicable / Not relevant |
|------------------------------------------------------------------------------------------------------------------------------------------------------------------------------------------------------------------------------------------------------------|-----------------------|-----------------------|-----------------------|-----------------------------|-----------------------|-----------------------|-----------------------|-----------------------|-----------------------|-------------------------------|
|                                                                                                                                                                                                                                                            | Not important         |                       |                       | Important but not essential |                       |                       |                       |                       | Essential             |                               |
| <p><b>Modifying other aspects of food or drink</b></p> <p>Changing the temperature, taste, amount or presentation of a child's food or drink (e.g. presenting different foods so they do not touch each other; mixing liked foods with disliked foods)</p> | <input type="radio"/> | <input type="radio"/> | <input type="radio"/> | <input type="radio"/>       | <input type="radio"/> | <input type="radio"/> | <input type="radio"/> | <input type="radio"/> | <input type="radio"/> | <input type="radio"/>         |

Q29\_2 Please provide any additional comments you have about this strategy here:

---

### Modifying Placement of Food

The graphs below show how important parents and professionals rated 'Modifying Placement of Food' as a strategy to be included as part of an 'intervention package' for children with eating and drinking difficulties.

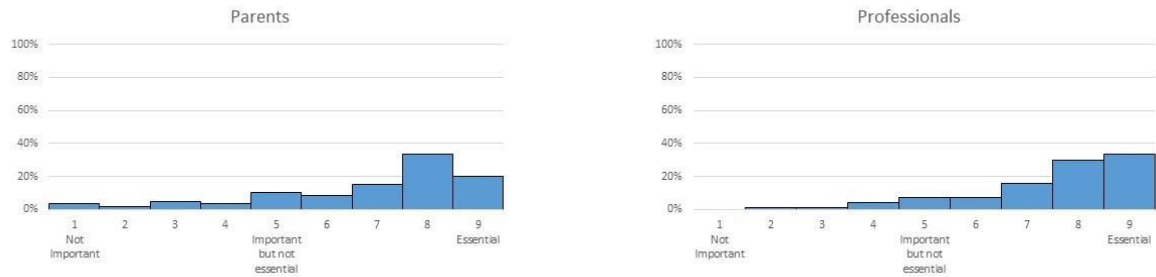

Q30\_1 Now that you know this, please re-rate how important you think this strategy is.

|                                                                                                                                                                       | 1                     | 2                     | 3                     | 4                     | 5                     | 6                     | 7                     | 8                     | 9                     | Not applicable / Not relevant |
|-----------------------------------------------------------------------------------------------------------------------------------------------------------------------|-----------------------|-----------------------|-----------------------|-----------------------|-----------------------|-----------------------|-----------------------|-----------------------|-----------------------|-------------------------------|
| <b>Modifying placement of food</b><br>Changing where the food is placed in a child's mouth to help chewing or swallowing (e.g. placing food to the side of the mouth) | <input type="radio"/>         |

Q30\_2 Please provide any additional comments you have about this strategy here:

---

### Enhancing Communication

The graphs below show how important parents and professionals rated 'Enhancing Communication' as a strategy to be included as part of an 'intervention package' for children with eating and drinking difficulties.

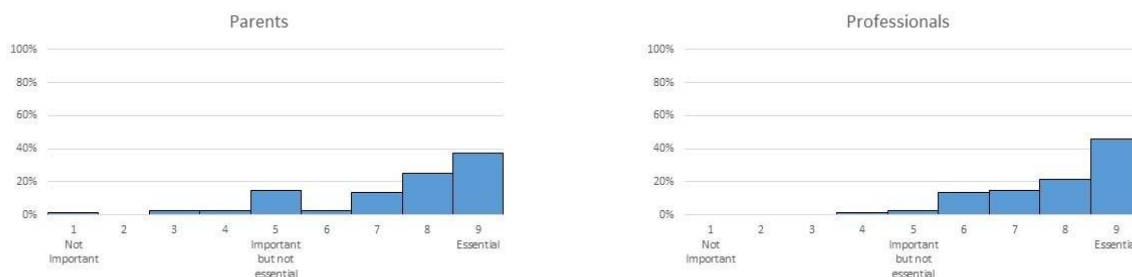

Q31\_1 Now that you know this, please re-rate how important you think this strategy is.

|                                                                                                                                                                                                                   | 1                     | 2                     | 3                     | 4                     | 5                           | 6                     | 7                     | 8                     | 9                     |                               |
|-------------------------------------------------------------------------------------------------------------------------------------------------------------------------------------------------------------------|-----------------------|-----------------------|-----------------------|-----------------------|-----------------------------|-----------------------|-----------------------|-----------------------|-----------------------|-------------------------------|
|                                                                                                                                                                                                                   | Not important         |                       |                       |                       | Important but not essential |                       |                       |                       | Essential             | Not applicable / Not relevant |
| <b>Enhancing communication</b>                                                                                                                                                                                    |                       |                       |                       |                       |                             |                       |                       |                       |                       |                               |
| Improving communication between a child and the person feeding them during mealtimes (e.g. offering choices of food to a child; a child using eye pointing or signs or symbols to ask for specific food or drink) | <input type="radio"/>       | <input type="radio"/> | <input type="radio"/> | <input type="radio"/> | <input type="radio"/> | <input type="radio"/>         |

Q31\_2 Please provide any additional comments you have about this strategy here:

---

**Visual supports**

The graphs below show how important parents and professionals rated 'Visual Supports' as a strategy to be included as part of an 'intervention package' for children with eating and drinking difficulties.

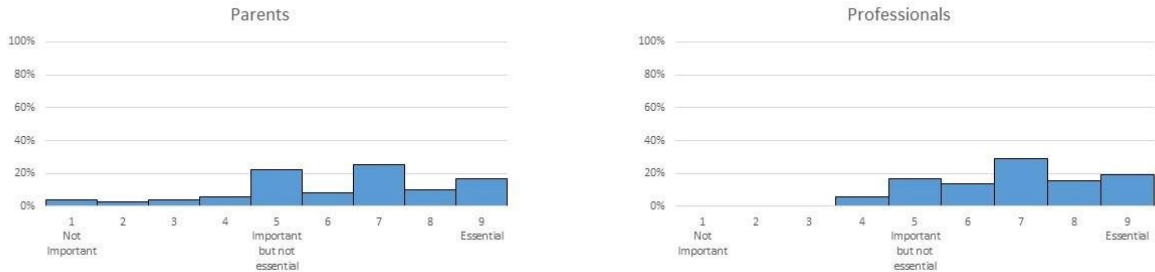

Q32\_1 Now that you know this, please re-rate how important you think this strategy is.

|                                                                                                                                                                                                                                                                                                           | 1                     | 2                     | 3                     | 4                     | 5                     | 6                     | 7                     | 8                     | 9                     | Not applicable / Not relevant |
|-----------------------------------------------------------------------------------------------------------------------------------------------------------------------------------------------------------------------------------------------------------------------------------------------------------|-----------------------|-----------------------|-----------------------|-----------------------|-----------------------|-----------------------|-----------------------|-----------------------|-----------------------|-------------------------------|
| <p><b>Visual supports</b><br/>Use of pictures, a "countdown clock", or social stories to increase a child's understanding of what happens during mealtimes (e.g. showing a child pictures of what food will be on their plate; showing a child a story to explain what will happen during a mealtime)</p> | <input type="radio"/>         |

Q32\_2 Please provide any additional comments you have about this strategy here:

---

### Responding to a Child's Cues for Feeding

The graphs below show how important parents and professionals rated 'Responding to a Child's Cues for Feeding' as a strategy to be included as part of an 'intervention package' for children with eating and drinking difficulties.

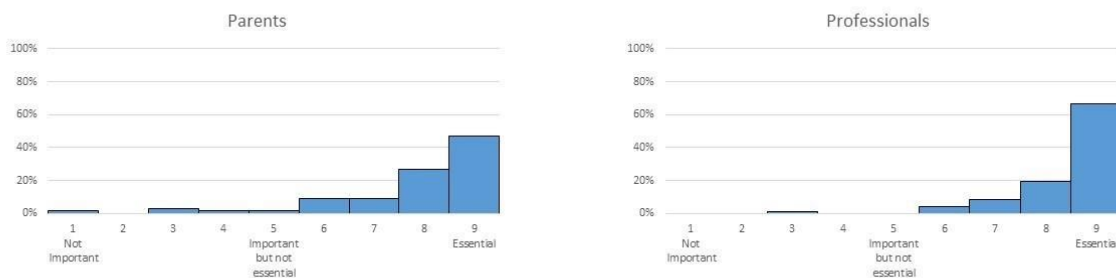

Q33\_1 Now that you know this, please re-rate how important you think this strategy is.

|                                                                                                                                                                                                                                                                             | 1                     | 2                     | 3                     | 4                     | 5                           | 6                     | 7                     | 8                     | 9                     |                               |
|-----------------------------------------------------------------------------------------------------------------------------------------------------------------------------------------------------------------------------------------------------------------------------|-----------------------|-----------------------|-----------------------|-----------------------|-----------------------------|-----------------------|-----------------------|-----------------------|-----------------------|-------------------------------|
|                                                                                                                                                                                                                                                                             | Not important         |                       |                       |                       | Important but not essential |                       |                       |                       | Essential             | Not applicable / Not relevant |
| <p><b>Responding to a child's cues for feeding</b></p> <p>Helping people to recognise the signs that a child is ready to take another mouthful of food or drink (e.g. looking for breath alterations or repeated swallows from a child to indicate a lack of readiness)</p> | <input type="radio"/>       | <input type="radio"/> | <input type="radio"/> | <input type="radio"/> | <input type="radio"/> | <input type="radio"/>         |

Q33\_2 Please provide any additional comments you have about this strategy here:

---

### Pace of Feeding

The graphs below show how important parents and professionals rated 'Pace of Feeding' as a strategy to be included as part of an 'intervention package' for children with eating and drinking difficulties.

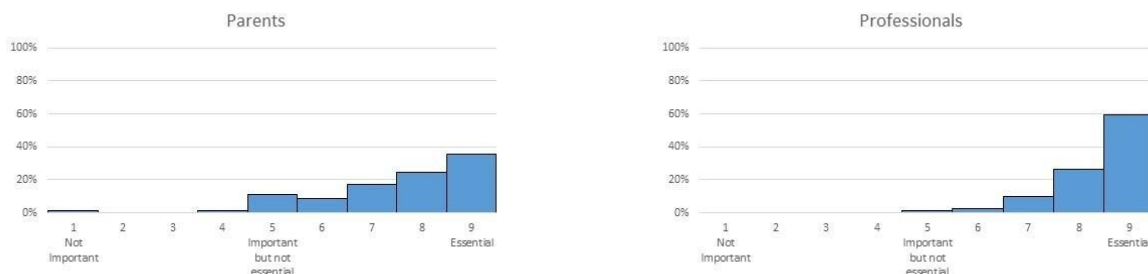

Q34\_1 Now that you know this, please re-rate how important you think this strategy is.

|                                                                                                                                                                                        | 1                     | 2                     | 3                     | 4                     | 5                           | 6                     | 7                     | 8                     | 9                     | Not applicable / Not relevant |
|----------------------------------------------------------------------------------------------------------------------------------------------------------------------------------------|-----------------------|-----------------------|-----------------------|-----------------------|-----------------------------|-----------------------|-----------------------|-----------------------|-----------------------|-------------------------------|
|                                                                                                                                                                                        | Not important         |                       |                       |                       | Important but not essential |                       |                       |                       | Essential             |                               |
| <p><b>Pace of feeding</b></p> <p>Changing the speed at which each mouthful of food or drink is taken by a child (e.g. slowing pace down to prevent overfilling of a child's mouth)</p> | <input type="radio"/>       | <input type="radio"/> | <input type="radio"/> | <input type="radio"/> | <input type="radio"/> | <input type="radio"/>         |

Q34\_2 Please provide any additional comments you have about this strategy here:

---

**Medication**

The graphs below show how important parents and professionals rated 'Medication' as a strategy to be included as part of an 'intervention package' for children with eating and drinking difficulties.

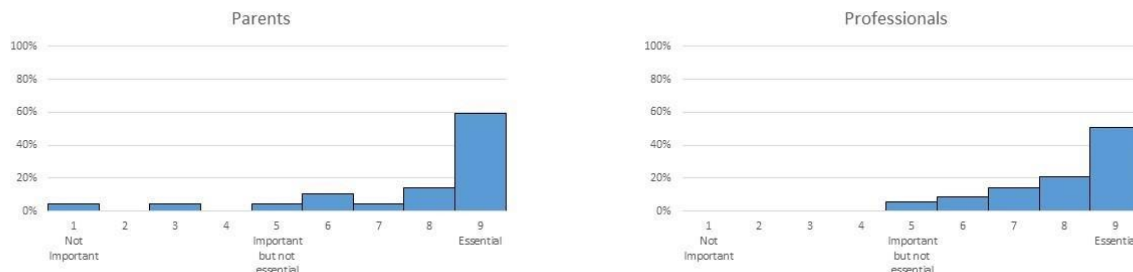

Q35\_1 Now that you know this, please re-rate how important you think this strategy is.

|                                                                                                     | 1                     | 2                     | 3                     | 4                     | 5                           | 6                     | 7                     | 8                     | 9                     |                               |
|-----------------------------------------------------------------------------------------------------|-----------------------|-----------------------|-----------------------|-----------------------|-----------------------------|-----------------------|-----------------------|-----------------------|-----------------------|-------------------------------|
|                                                                                                     | Not important         |                       |                       |                       | Important but not essential |                       |                       |                       | Essential             | Not applicable / Not relevant |
| <b>Medication</b> Any medication (e.g. for epilepsy, pain, drooling, tone, gastroesophageal reflux) | <input type="radio"/>       | <input type="radio"/> | <input type="radio"/> | <input type="radio"/> | <input type="radio"/> | <input type="radio"/>         |

Q35\_2 Please provide any additional comments you have about this strategy here:

---

### Energy Supplements

The graphs below show how important parents and professionals rated 'Energy Supplements' as a strategy to be included as part of an 'intervention package' for children with eating and drinking difficulties.

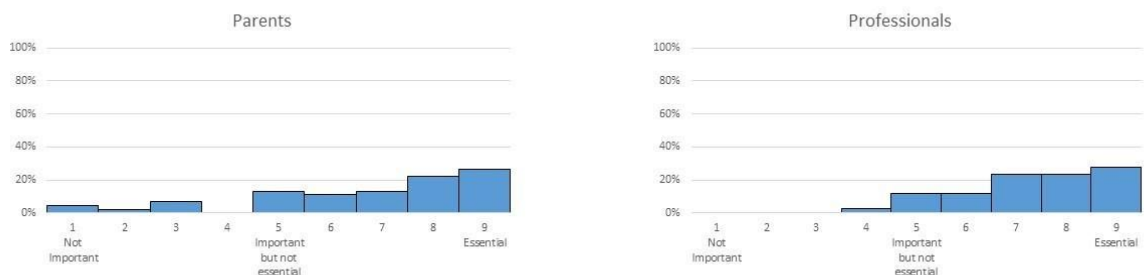

Q36\_1 Now that you know this, please re-rate how important you think this strategy is.

|                                                                   | 1                     | 2                     | 3                     | 4                     | 5                           | 6                     | 7                     | 8                     | 9                     | Not applicable / Not relevant |
|-------------------------------------------------------------------|-----------------------|-----------------------|-----------------------|-----------------------|-----------------------------|-----------------------|-----------------------|-----------------------|-----------------------|-------------------------------|
|                                                                   | Not important         |                       |                       |                       | Important but not essential |                       |                       |                       | Essential             |                               |
| <b>Energy supplements</b>                                         |                       |                       |                       |                       |                             |                       |                       |                       |                       |                               |
| Any energy or calorie supplement given orally or via feeding tube | <input type="radio"/>       | <input type="radio"/> | <input type="radio"/> | <input type="radio"/> | <input type="radio"/> | <input type="radio"/>         |

Q36\_2 Please provide any additional comments you have about this strategy here:

---



### Vitamin or Nutritional Supplements

The graphs below show how important parents and professionals rated 'Vitamin or Nutritional Supplements' as a strategy to be included as part of an 'intervention package' for children with eating and drinking difficulties.

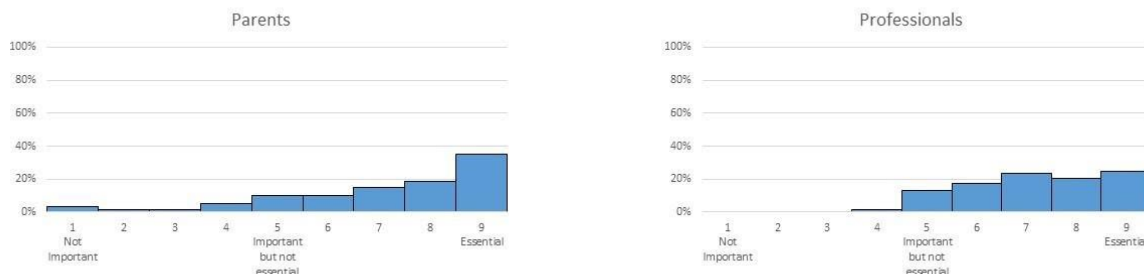

Q37\_1 Now that you know this, please re-rate how important you think this strategy is.

|                                                                                                                                                     | 1                     | 2                     | 3                     | 4                     | 5                     | 6                     | 7                     | 8                     | 9                     | Not applicable / Not relevant |
|-----------------------------------------------------------------------------------------------------------------------------------------------------|-----------------------|-----------------------|-----------------------|-----------------------|-----------------------|-----------------------|-----------------------|-----------------------|-----------------------|-------------------------------|
| <b>Vitamin or nutritional supplements</b><br>Any supplements given or changes to a child's diet to increase the vitamins or nutrients in their diet | <input type="radio"/>         |

Q37\_2 Please provide any additional comments you have about this strategy here:

---

### Physical Support

The graphs below show how important parents and professionals rated 'Physical Support' as a strategy to be included as part of an 'intervention package' for children with eating and drinking difficulties.

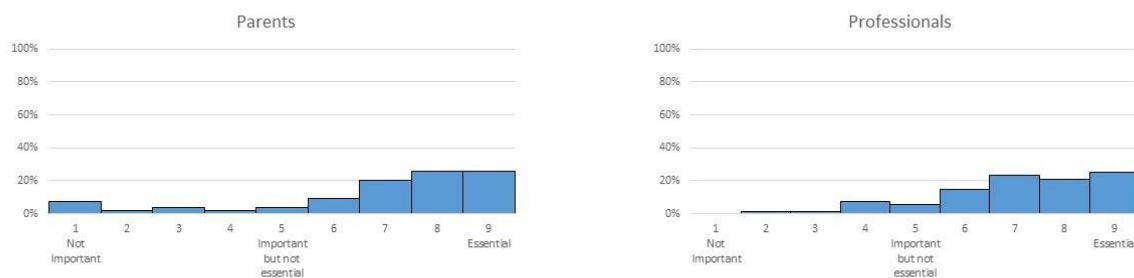

Q38\_1 Now that you know this, please re-rate how important you think this strategy is.

|                                                                                                                                                                                                                                  | 1                     | 2                     | 3                     | 4                     | 5                           | 6                     | 7                     | 8                     | 9                     |                               |
|----------------------------------------------------------------------------------------------------------------------------------------------------------------------------------------------------------------------------------|-----------------------|-----------------------|-----------------------|-----------------------|-----------------------------|-----------------------|-----------------------|-----------------------|-----------------------|-------------------------------|
|                                                                                                                                                                                                                                  | Not important         |                       |                       |                       | Important but not essential |                       |                       |                       | Essential             | Not applicable / Not relevant |
| <b>Physical support</b> Giving direct physical support to a child when eating or drinking to improve the movements needed to bite, chew and swallow (e.g. placing a thumb underneath the chin to help a child close their mouth) | <input type="radio"/>       | <input type="radio"/> | <input type="radio"/> | <input type="radio"/> | <input type="radio"/> | <input type="radio"/>         |

Q38\_2 Please provide any additional comments you have about this strategy here:

---

### Oral and Sensory Desensitisation

The graphs below show how important parents and professionals rated 'Oral and Sensory Desensitisation' as a strategy to be included as part of an 'intervention package' for children with eating and drinking difficulties.

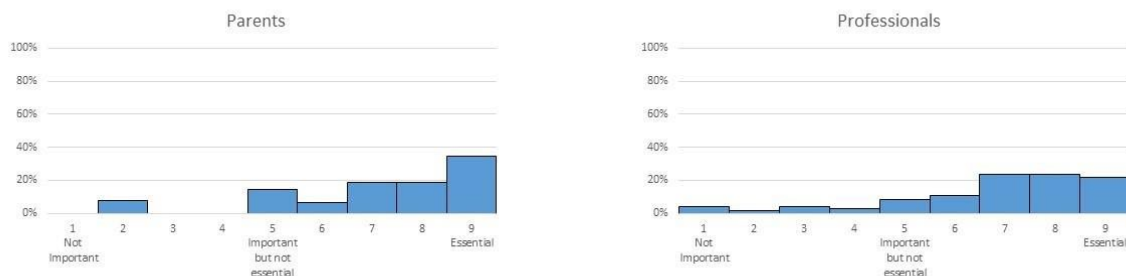

Q39\_1 Now that you know this, please re-rate how important you think this strategy is.

|                                                                                                                                                                                                                                                        | 1                     | 2                     | 3                     | 4                     | 5                     | 6                     | 7                     | 8                     | 9                     | Not applicable / Not relevant |
|--------------------------------------------------------------------------------------------------------------------------------------------------------------------------------------------------------------------------------------------------------|-----------------------|-----------------------|-----------------------|-----------------------|-----------------------|-----------------------|-----------------------|-----------------------|-----------------------|-------------------------------|
| <p><b>Oral and sensory desensitisation</b></p> <p>Activities aimed at reducing a child's adverse reactions to different sensory experiences linked to eating and drinking (e.g. face massage; chewing non-food items such as a chewy 'toothbrush')</p> | <input type="radio"/>         |

Q39\_2 Please provide any additional comments you have about this strategy here:

---

### Oral Motor Exercises

The graphs below show how important parents and professionals rated 'Oral Motor Exercises' as a strategy to be included as part of an 'intervention package' for children with eating and drinking difficulties.

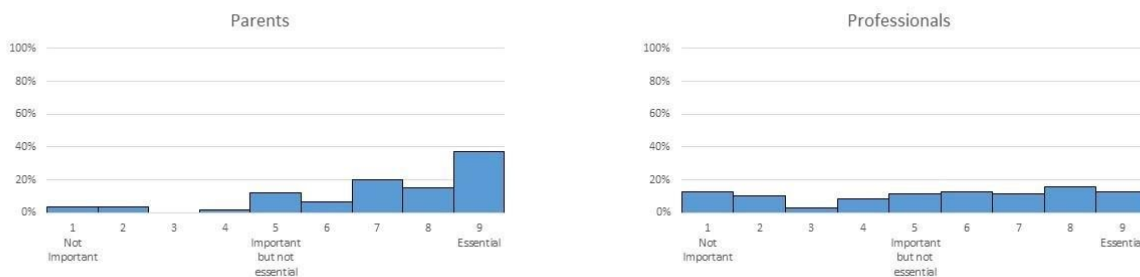

Q40\_1 Now that you know this, please re-rate how important you think this strategy is.

|                                                                                                                                                                                                                           | 1                     | 2                     | 3                     | 4                     | 5                           | 6                     | 7                     | 8                     | 9                     | Not applicable / Not relevant |
|---------------------------------------------------------------------------------------------------------------------------------------------------------------------------------------------------------------------------|-----------------------|-----------------------|-----------------------|-----------------------|-----------------------------|-----------------------|-----------------------|-----------------------|-----------------------|-------------------------------|
|                                                                                                                                                                                                                           | Not important         |                       |                       |                       | Important but not essential |                       |                       |                       | Essential             |                               |
| <p><b>Oral motor exercises</b></p> <p>Exercises done with a child to improve the control of their mouth, jaw, tongue or lips (e.g. a child moving a non-food item with their tongue; a child sucking through a straw)</p> | <input type="radio"/>       | <input type="radio"/> | <input type="radio"/> | <input type="radio"/> | <input type="radio"/> | <input type="radio"/>         |

Q40\_2 Please provide any additional comments you have about this strategy here:

---

### Graded Exposure to New Food

The graphs below show how important parents and professionals rated 'Graded Exposure to New Food' as a strategy to be included as part of an 'intervention package' for children with eating and drinking difficulties.

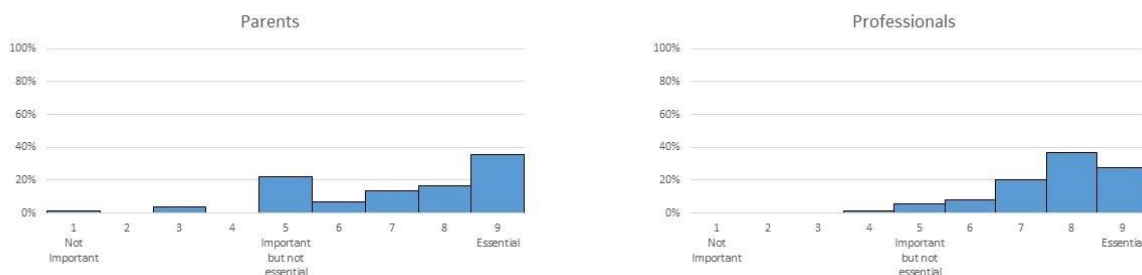

Q41\_1 Now that you know this, please re-rate how important you think this strategy is.

|                                                                                                                                                                                                                                                                                                                                                                 | 1                     | 2                     | 3                     | 4                     | 5                           | 6                     | 7                     | 8                     | 9                     | Not applicable / Not relevant |
|-----------------------------------------------------------------------------------------------------------------------------------------------------------------------------------------------------------------------------------------------------------------------------------------------------------------------------------------------------------------|-----------------------|-----------------------|-----------------------|-----------------------|-----------------------------|-----------------------|-----------------------|-----------------------|-----------------------|-------------------------------|
|                                                                                                                                                                                                                                                                                                                                                                 | Not important         |                       |                       |                       | Important but not essential |                       |                       |                       | Essential             |                               |
| <b>Graded exposure to new food</b><br>Activities aimed at gradually exposing a child to new or disliked foods and drinks (e.g. messy play activities involving a child; touching new or disliked foods; using small steps towards a child accepting new or disliked foods such as licking the food or putting it in their mouth with no expectation to swallow) | <input type="radio"/>       | <input type="radio"/> | <input type="radio"/> | <input type="radio"/> | <input type="radio"/> | <input type="radio"/>         |

Q41\_2 Please provide any additional comments you have about this strategy here:

---

### Graded Exposure to New Textures

The graphs below show how important parents and professionals rated 'Graded Exposure to New Textures' as a strategy to be included as part of an 'intervention package' for children with eating and drinking difficulties.

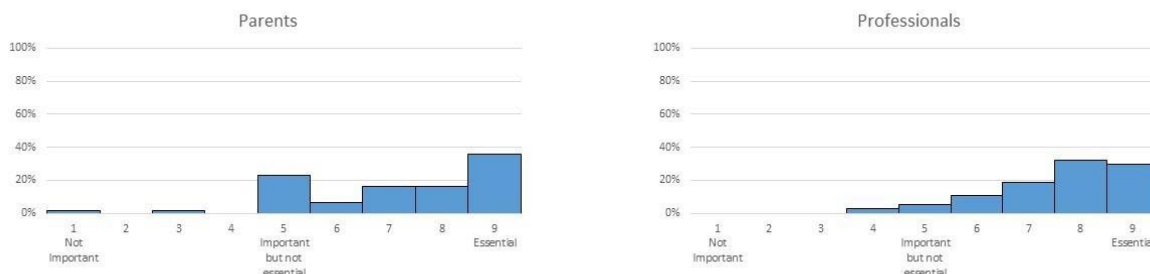

Q42\_1 Now that you know this, please re-rate how important you think this strategy is.

|                                                                                                                                                                                                                                                                                                                            | 1                     | 2                     | 3                     | 4                     | 5                           | 6                     | 7                     | 8                     | 9                     | Not applicable / Not relevant |
|----------------------------------------------------------------------------------------------------------------------------------------------------------------------------------------------------------------------------------------------------------------------------------------------------------------------------|-----------------------|-----------------------|-----------------------|-----------------------|-----------------------------|-----------------------|-----------------------|-----------------------|-----------------------|-------------------------------|
|                                                                                                                                                                                                                                                                                                                            | Not important         |                       |                       |                       | Important but not essential |                       |                       |                       | Essential             |                               |
| <b>Graded exposure to new textures</b><br>Activities aimed at gradually introducing a child to more challenging food textures and fluid consistencies (e.g. messy play activities involving a child touching new or disliked textures; using small steps to introduce a child to lumpy food or foods that require chewing) | <input type="radio"/>       | <input type="radio"/> | <input type="radio"/> | <input type="radio"/> | <input type="radio"/> | <input type="radio"/>         |

Q42\_2 Please provide any additional comments you have about this strategy here:

---

### Changing Behaviour at Mealtimes

The graphs below show how important parents and professionals rated 'Changing Behaviour at Mealtimes' as a strategy to be included as part of an 'intervention package' for children with eating and drinking difficulties.

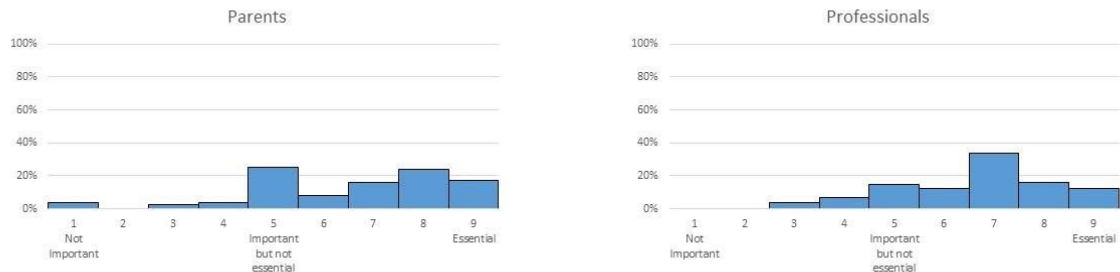

Q43\_1 Now that you know this, please re-rate how important you think this strategy is.

|                                                                                                                                                                                              | 1                     | 2                     | 3                     | 4                     | 5                           | 6                     | 7                     | 8                     | 9                     | Not applicable / Not relevant |
|----------------------------------------------------------------------------------------------------------------------------------------------------------------------------------------------|-----------------------|-----------------------|-----------------------|-----------------------|-----------------------------|-----------------------|-----------------------|-----------------------|-----------------------|-------------------------------|
|                                                                                                                                                                                              | Not important         |                       |                       |                       | Important but not essential |                       |                       |                       | Essential             |                               |
| <b>Changing behaviour at mealtimes</b><br>Strategies to encourage a child to behave appropriately at mealtimes (e.g. a child sitting down ready to eat; a child staying seated for the meal) | <input type="radio"/>       | <input type="radio"/> | <input type="radio"/> | <input type="radio"/> | <input type="radio"/> | <input type="radio"/>         |

Q43\_2 Please provide any additional comments you have about this strategy here:

---

**Modelling**

The graphs below show how important parents and professionals rated 'Modelling' as a strategy to be included as part of an 'intervention package' for children with eating and drinking difficulties.

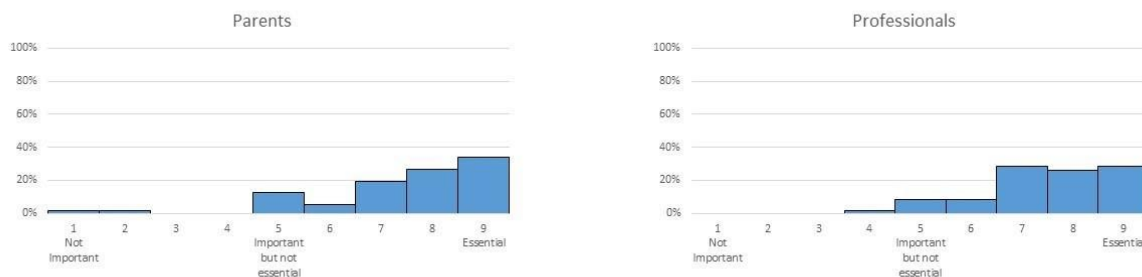

Q44\_1 Now that you know this, please re-rate how important you think this strategy is.

|                                                                                                                                                                                    | 1                     | 2                     | 3                     | 4                     | 5                           | 6                     | 7                     | 8                     | 9                     | Not applicable / Not relevant |
|------------------------------------------------------------------------------------------------------------------------------------------------------------------------------------|-----------------------|-----------------------|-----------------------|-----------------------|-----------------------------|-----------------------|-----------------------|-----------------------|-----------------------|-------------------------------|
|                                                                                                                                                                                    | Not important         |                       |                       |                       | Important but not essential |                       |                       |                       | Essential             |                               |
| <b>Modelling</b><br>Giving a child the opportunity to learn from others by eating and drinking with them (e.g. sitting a child with other children or family members at mealtimes) | <input type="radio"/>       | <input type="radio"/> | <input type="radio"/> | <input type="radio"/> | <input type="radio"/> | <input type="radio"/>         |

Q44\_2 Please provide any additional comments you have about this strategy here:

---



### Training to Self-Feed

The graphs below show how important parents and professionals rated 'Training to Self-Feed' as a strategy to be included as part of an 'intervention package' for children with eating and drinking difficulties.

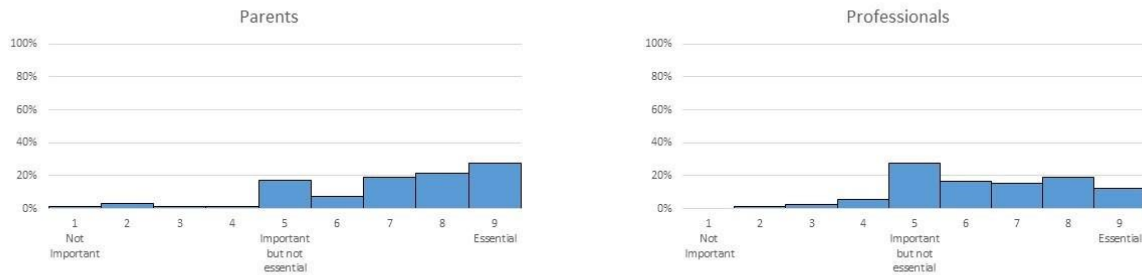

Q45\_1 Now that you know this, please re-rate how important you think this strategy is.

|                                                                                                                       | 1                     | 2                     | 3                     | 4                     | 5                           | 6                     | 7                     | 8                     | 9                     | Not applicable / Not relevant |
|-----------------------------------------------------------------------------------------------------------------------|-----------------------|-----------------------|-----------------------|-----------------------|-----------------------------|-----------------------|-----------------------|-----------------------|-----------------------|-------------------------------|
|                                                                                                                       | Not important         |                       |                       |                       | Important but not essential |                       |                       |                       | Essential             |                               |
| <b>Training to self feed</b>                                                                                          |                       |                       |                       |                       |                             |                       |                       |                       |                       |                               |
| Teaching a child to feed themselves (e.g. placing a hand over a child's hand to help guide the food into their mouth) | <input type="radio"/>       | <input type="radio"/> | <input type="radio"/> | <input type="radio"/> | <input type="radio"/> | <input type="radio"/>         |

Q45\_2 Please provide any additional comments you have about this strategy here:

---

### Support for Parents

The graphs below show how important parents and professionals rated 'Support for Parents' as a strategy to be included as part of an 'intervention package' for children with eating and drinking difficulties.

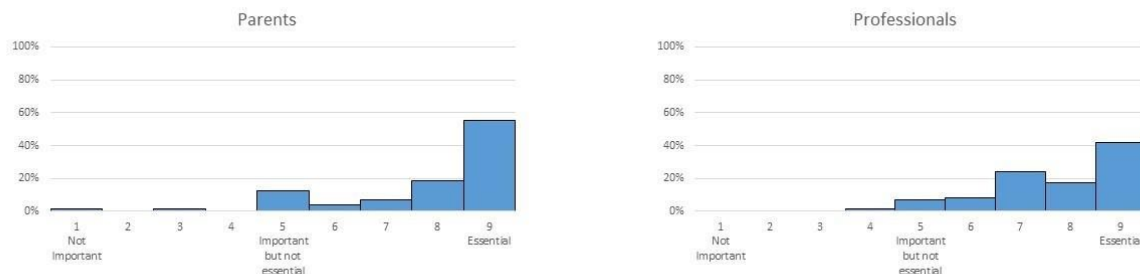

Q46\_1 Now that you know this, please re-rate how important you think this strategy is.

|                                                                                                                                                | 1                     | 2                     | 3                     | 4                     | 5                           | 6                     | 7                     | 8                     | 9                     | Not applicable / Not relevant |
|------------------------------------------------------------------------------------------------------------------------------------------------|-----------------------|-----------------------|-----------------------|-----------------------|-----------------------------|-----------------------|-----------------------|-----------------------|-----------------------|-------------------------------|
|                                                                                                                                                | Not important         |                       |                       |                       | Important but not essential |                       |                       |                       | Essential             |                               |
| <b>Support for parents</b><br>Help for parents around their child's eating and drinking difficulties (e.g. counselling; parent support groups) | <input type="radio"/>       | <input type="radio"/> | <input type="radio"/> | <input type="radio"/> | <input type="radio"/> | <input type="radio"/>         |

Q46\_2 Please provide any additional comments you have about this strategy here:

---

### Sharing Information

The graphs below show how important parents and professionals rated 'Sharing Information' as a strategy to be included as part of an 'intervention package' for children with eating and drinking difficulties.

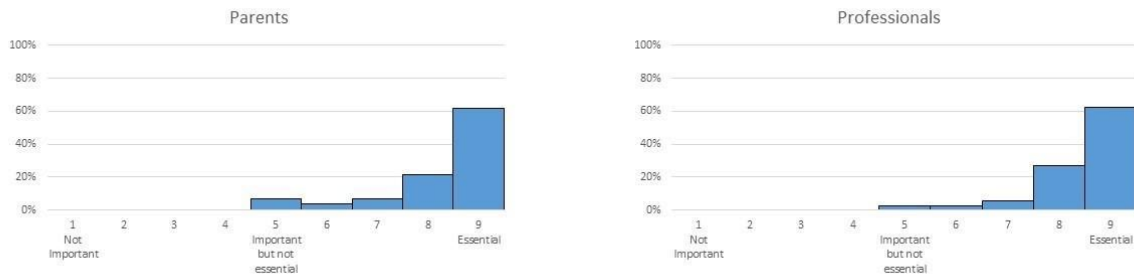

Q47\_1 Now that you know this, please re-rate how important you think this strategy is.

|                                                                                                                                                                                                                                                                                                                                                   | 1                     | 2                     | 3                     | 4                     | 5                           | 6                     | 7                     | 8                     | 9                     | Not applicable / Not relevant |
|---------------------------------------------------------------------------------------------------------------------------------------------------------------------------------------------------------------------------------------------------------------------------------------------------------------------------------------------------|-----------------------|-----------------------|-----------------------|-----------------------|-----------------------------|-----------------------|-----------------------|-----------------------|-----------------------|-------------------------------|
|                                                                                                                                                                                                                                                                                                                                                   | Not important         |                       |                       |                       | Important but not essential |                       |                       |                       | Essential             |                               |
| <b>Sharing Information</b> Any information shared to help parents and professionals understand a child's difficulties with eating and drinking (e.g. professionals teaching parents and school staff about a child's physical or sensory difficulties; parents helping professionals understand what's important about mealtimes in their family) | <input type="radio"/>       | <input type="radio"/> | <input type="radio"/> | <input type="radio"/> | <input type="radio"/> | <input type="radio"/>         |

Q47\_2 Please provide any additional comments you have about this strategy here:

---

## Psychological Support for Children

The graphs below show how important parents and professionals rated 'Psychological Support for Children' as a strategy to be included as part of an 'intervention package' for children with eating and drinking difficulties.

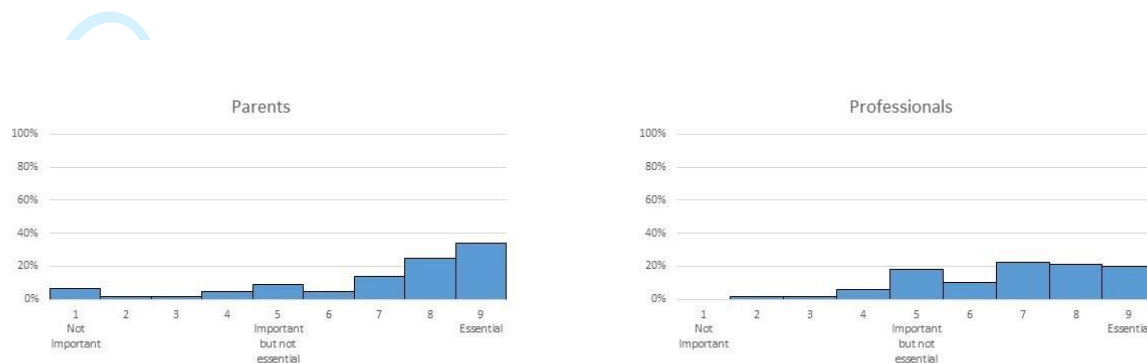

Q48\_1 Now that you know this, please re-rate how important you think this strategy is.

|                                                                                                                                 | 1                     | 2                     | 3                     | 4                     | 5                     | 6                     | 7                     | 8                     | 9                     | Not applicable / Not relevant |
|---------------------------------------------------------------------------------------------------------------------------------|-----------------------|-----------------------|-----------------------|-----------------------|-----------------------|-----------------------|-----------------------|-----------------------|-----------------------|-------------------------------|
| <b>Psychological support for children</b><br>Psychological help for a child (e.g. counselling or cognitive behavioural therapy) | <input type="radio"/>         |

Q48\_2 Please provide any additional comments you have about this strategy here:

---

Q49 Please provide any additional strategies you think are important or essential here:

If you provided any additional strategies in the previous round, we will take account of these so you do not need to repeat these comments again on this survey. Thank you.

1  
2  
3 **What interventions, which could be delivered at home by parents, are available to**  
4 **improve eating in young children with neurodisability and are suitable for investigation**  
5 **in pragmatic trials?**  
6  
7

8  
9 **Protocol Version:** Version 3  
10

11  
12 **Chief Investigator:** Dr Jeremy Parr  
13  
14 Clinical Senior Lecturer and  
15  
16 Consultant, Paediatric Neurodisability  
17  
18

19 **Sponsor:** Newcastle upon Tyne Hospitals NHS Foundation Trust  
20  
21

22 **Registrations:**

23  
24 NIHR Reference: 15/156/02

25  
26 IRAS Number: 215629

27  
28 REC Reference: 17/WM/0439

29  
30 R+D Reference: 08472  
31

32  
33 **Sites:**

34 Newcastle University  
35  
36

37  
38 Exeter University  
39  
40

41 Chailey Heritage Clinical Services

42  
43 Sussex Community NHS Trust  
44  
45

46  
47 Guy's and St Thomas' NHS Foundation Trust  
48  
49

50 **Study Start Date:** 01/07/17

51 **Likely End Date:** 30/12/19  
52  
53

54  
55 This study is funded by the NIHR HTA Programme (IRAS ID: 215629)

56  
57 The views expressed are those of the author(s) and not necessarily those of the NHS, the  
58 NIHR or the Department of Health.  
59  
60

## CONTENTS

|                                        |    |
|----------------------------------------|----|
| 1) Summary of research                 | 3  |
| 2) Background and Rationale            | 5  |
| 3) Aims and Objectives                 | 5  |
| 3.1 Aim                                | 5  |
| 3.2 Objectives                         | 6  |
| 4) Research Plan                       | 6  |
| 4.1 Health Technologies being assessed | 6  |
| 4.2 Design and theoretical framework   | 7  |
| 4.2.1 Addressing Aim 1                 | 7  |
| 4.2.2 Addressing Aim 2                 | 10 |
| 4.2.3 Addressing Aim 3                 | 12 |
| 5) Dissemination and Outputs           |    |
| 5.1 Dissemination                      | 15 |
| 5.2 Outputs                            | 16 |
| 6) Study Management                    | 16 |
| 7) Patient and public involvement      | 16 |
| 8) Research Team                       | 16 |
| 9) References                          | 17 |

## **1) Summary of Research**

### **Purpose:**

To answer the question: What interventions, which could be delivered at home by parents, are available to improve eating in young children with neurodisability and are suitable for investigation in pragmatic trials?

### **Design:**

Sequential mixed methods.

1. 1<sup>st</sup> round of focus groups: Professionals (health and education staff) and parents to gain a preliminary understanding of interventions offered to families of children with EDSD.
2. Survey 1: Professionals (health and education staff) and parents to identify current use of interventions that parents of young children with eating, drinking and swallowing difficulties can use at home.
3. Updating systematic reviews: Update three recent systematic reviews about interventions.
4. Evidence mapping: To identify potential interventions, outcomes and measurement tools and examine properties of the identified tools most frequently used and most valued to measure outcomes.
5. Evidence synthesis 1: Synthesis of evidence gathered through steps 1-4.
6. 2<sup>nd</sup> round of focus groups: Professionals (health and education staff), parents and young people to review evidence from the synthesis 1.
7. Delphi survey: To gain consensus on trial components.
8. Evidence synthesis 2: Synthesis of evidence gathered through steps 6-7.
9. Consensus workshops: To draw together all the available evidence to suggest a framework and outcomes for one or more trial(s) of interventions for children with EDSD.

### **Settings**

NHS hospital and community services, family homes, education settings. UK parent and professional groups.

### **Current care pathways:**

Interventions for Eating, Drinking and Swallowing Difficulties (EDSD) which young children in the UK currently receive.

**Target population:** Young children with physical or non-physical EDSD, their parents, and professionals that support them.

### **Inclusion criteria:**

Young people with neurodisability and EDSD (aged 12-18 years); parents of young children with neurodisability and EDSD up to and including 12 years of age; parents who have been discharged home from neonatal units will be included; professionals who support children with neurodisability with EDSD.

### **Exclusion criterion:**

Young children with progressive neurodisability and their parents; young children without neurodisability and their parents; parents of children who are inpatients postnatally.

### **Health Technologies being assessed:**

Interventions to improve EDSD in young children with neurodisability

### **Measurement of costs and outcomes:**

No health economic study will be undertaken but will be introduced to a future trial design

### **Sample size:**

Aim 1 - Identifying current interventions and their evaluation:

Four focus groups (six participants each, 24 participants in total):

1. One for parents of young children with physical EDSD
2. One for parents of young children with non-physical EDSD
3. One for professionals of young children with physical EDSD (to include paediatrician, speech and language therapist, occupational therapist, dietician, gastroenterologist)
4. One for professionals of young children with non-physical EDSD

Survey: 200 UK parents of children with EDSD, 200 NHS professionals who recommend interventions for children with EDSD, 100 nursery/school staff who feed children with EDSD.

Aim 2 - Reviewing the evidence for interventions, outcomes measured and the tools used to measure these outcomes: Update three systematic reviews; undertake evidence mapping; investigate the outcomes and measurement tools used and preferred. Synthesise evidence.

Aim 3 – Designing trial frameworks and specification:

Twelve focus groups (six participants each, except the young people's groups which will include 3-4 participants each).

1. Two for parents of young children with physical EDSD (12 parents)
2. Two for parents of young children with non-physical EDSD (12 parents)
3. Two for professionals of young children with physical EDSD (12 professionals)
4. Two for professionals of young children with non-physical EDSD (12 professionals)
5. One to two for young people with physical EDSD (4-6 young people)
6. One to two for young people with non-physical EDSD (4-6 young people)

Delphi survey: 100-200 respondents from survey.

Two consensus workshops: 10 parents and 10 professionals at each.

#### Timetable:

The study will take place over 2 years. Months 1-2: Research Associate training. Start update of systematic reviews. Start mapping review. 3-4: Focus groups (parents and professionals); then survey design; engage networks. 5-7: Survey; then review properties of measurement tools. 8-10: Synthesis of evidence findings. 11-13: Focus groups about evidence findings. 14-18: Delphi survey. 19-20: Consensus workshops. 21-24: Evidence based recommendations for future trial design, completion of HTA report, dissemination.

#### Deliverables:

1. Identification of treatments available in the NHS for children with physical and non-physical EDSD
2. Identification of the most promising interventions and specification of the patient groups in whom the intervention(s) should be tested, including whether exemplar conditions should be used in a trial; what 'treatment as usual' comprises, and its acceptability
3. Selection of the key outcomes and recommendation of the measurement tools that could be used
4. A suggested framework and outcomes for one or more substantive pragmatic trials.



## **2) Background and Rationale**

Eating, Drinking and Swallowing Difficulties (EDSD) may lead to inadequate calorie intake, affecting a child's nutrition, growth and general physical health (Sullivan, 2009). There are two broad causes of EDSD: 1. physical causes which can affect control of the muscles of the lips, tongue, mouth, and throat (e.g. children with cerebral palsy) and impair the efficiency and safety of sucking, chewing and swallowing; 2. non-physical causes including sensory sensitivity (leading to aversion, and potential refusal of certain foods), and rigidity or rituals associated with food or mealtimes (e.g. children with autism spectrum disorder). Physical and non-physical EDSD frequently co-exist (e.g. children with cerebral palsy or Down syndrome). Both types of difficulties make mealtimes stressful for children and their families and have negative impacts on quality of life and social participation. The interventions available for physical and non-physical EDSD are different.

Parents and carers of children with EDSD are usually supported by multidisciplinary teams of health professionals (Parr et al., 2013). Professionals identify the cause(s) of the child's EDSD by a combination of review of the child's previous and current EDSD, clinical observation, and instrumental evaluation (for example, videofluoroscopy). Taking account of parents' views, individualised advice is given on how and what to feed their child to improve the safety and efficiency of eating and drinking, and how to manage behaviour so mealtimes are a positive experience (Andrew et al., 2012). It is unclear which interventions are commonly used, and whether there is robust evidence for 'best clinical practice' (Morgan et al., 2012; Marshall et al., 2015). The interventions professionals may advise families to adopt can be time consuming, can involve considerable changes to parents' usual feeding plans and are sometimes contrary to parents' beliefs about how their child should be fed. There is little evidence about which interventions are effective; which are provided in the NHS; which are viewed as acceptable and feasible by families and professionals; or how intervention success should be measured.

Trials are needed to establish the effectiveness of intervention(s) that parents can deliver at home. However, before trials can be undertaken we need to know: which groups of children are most likely to benefit; the range of interventions available; what parents and professionals think are the most relevant outcomes; what outcome measurement tools are efficient and valid; and what types of trial design would be acceptable to children, parents and professionals.

## **3) Aims and Objectives**

This study will focus on young children with non-progressive neurodisability and an EDSD with either (or both) a physical or non-physical cause. We will conduct a scoping study regarding the question: What are the interventions, which could be delivered at home by parents, to improve eating in children with neurodisability and which are suitable for investigation in pragmatic trials?

### **3.1 Aims:**

1. To determine which parent-delivered interventions are currently offered by NHS professionals and how parents and professionals evaluate whether an intervention is successful or not
2. To review the clinical practice and research evidence for interventions, outcomes measured and the tools used to measure these outcomes
3. To construct one or more trial frameworks acceptable to children, young people, parents and professionals; or to specify the additional evidence about interventions, outcomes and tools that would be needed to support a future trial

### 3.2 Objectives:

To meet Aim 1:

1. Identify the case mix of young children with physical and non-physical EDSD needing intervention, and the ages at which different interventions are used
2. Explore parents' views and experiences of the interventions received, including feasibility and acceptability, and identify which outcomes they consider more or less important
3. Obtain information from professionals about which interventions are used. Then for each intervention: Who delivers training to parents or nursery/school staff? How often is the intervention used? Where is it used? How is progress assessed and what tools are used to measure this? Do professionals think the intervention is effective and over what timescale?

To meet Aim 2:

1. Update the three high quality systematic reviews which appraise the effectiveness of interventions for EDSD
2. Conduct an evidence mapping review of interventions.
3. Identify the subgroups of children for whom there is the most robust evidence on intervention success / failure
4. Investigate the extent to which interventions have been defined and manualised to facilitate replication
5. Assess the reliability and validity of the tools, as identified in the survey and reviews, most frequently used to measure the outcomes valued by parents and professionals with regard to eating and drinking interventions in children with neurodisability

To meet Aim 3:

1. Propose the most promising candidate interventions, define 'treatment as usual', set out the key meaningful outcomes to be measured and potential measurement tools
2. Explore young person, parent and professional views on the proposed interventions, outcomes and measurement tools to be used in a future trial
3. Propose which groups of children would be included in a trial, and define inclusion/exclusion criteria
4. Specify framework(s) for one or more pragmatic trials

## **4) Research Plan**

We describe the research plan in this section by covering:

- The health technologies being assessed
- The overall design and theory underpinning it
- The methods adopted to address each of the study's aims.
  - Aim 1: Focus groups and national survey
  - Aim 2: Systematic reviews and evidence mapping review
  - Aim 3: Further focus groups, Delphi survey and two consensus workshops

## **Evidence mapping review and search strategy**

### **4.1 Health Technologies being assessed**

We will identify the interventions, which could be delivered at home by parents, that are available to improve eating and drinking in children with neurodisability and are suitable for

1  
2  
3 investigation in pragmatic trials. We will appraise various health technologies that may improve  
4 eating and drinking. We will not include nasogastric or gastrostomy tube feeding, as these are  
5 means to replace or supplement eating and drinking and therefore we think are outside the  
6 scope of an 'eating and drinking interventions' study.  
7

#### 9 4.2 Design and theoretical/conceptual framework

11 This proposal will use the framework of the UK Medical Research Council (MRC) guidance for  
12 'complex' (multifaceted) interventions (Craig et al., 2008). Specifically, the tasks from the  
13 framework that will be addressed in the present study are: establishing evidence about the  
14 problems and solutions (here evidence about EDSD interventions and 'treatment as usual');  
15 and testing the procedures (here investigating the acceptability of interventions, outcomes and  
16 measures).  
17

18 As recommended by the MRC framework for these stages, we will use a mixed methods  
19 approach. The study will have a sequential design where the findings of a previous step will  
20 be used to inform the following step. Thus, we will undertake focus group work and a survey;  
21 in parallel we will update three systematic reviews, followed by an evidence mapping review.  
22 Then, after evidence synthesis, further focus groups will be convened, a Delphi survey  
23 undertaken and finally two workshops to seek consensus for a proposed pragmatic trial(s).  
24  
25

##### 27 4.2.1 Addressing Aim 1: Identifying current interventions and their evaluation

#### 31 **First round of focus groups**

32 Four focus group will be conducted in the North East: one with parents of children who have  
33 physical EDSD; one with parents of children who have non-physical EDSD; one with  
34 professionals working with children with physical EDSD; one with professionals working with  
35 children who have non-physical EDSD.  
36  
37  
38

#### 39 Sample size:

41 The two parent and two professional focus groups will each include 6 participants (Kitzinger  
42 1995) (24 participants in total).  
43  
44

#### 45 Participants:

47 Parents/guardians/foster carers of children with eating and drinking difficulties will be identified  
48 from local parent organisations or research databases (for example, the Autism Spectrum  
49 Database-UK / Database of children with Autism Spectrum Disorder living in North East  
50 England (Warnell et al., 2015)). Parents will be purposively sampled to capture a wide range  
51 of eating and drinking difficulties, and diversity in family characteristics (age of child; ethnicity;  
52 rural/urban location; socioeconomic status; family size). Parr, Pennington and Morris have  
53 successfully used this method of recruitment for parent focus groups. Parents will receive a  
54 £50 shopping voucher to thank them for their time, and to cover any travel and parking costs.  
55

56 Multidisciplinary team professionals working with children with EDSD will be recruited from  
57 regional professional networks in the North East (for example, the Northern Paediatric  
58 Neurodisability Network, North East hub of the Council Allied Health Professionals' Research,  
59  
60

1  
2  
3 the Royal College of Speech Language Therapists North East Paediatric Dysphagia Clinical  
4 Excellence Network, North East England Branch of the British Dietetic Society).  
5  
6  
7

### 8 Ensuring representativeness:

9 We will focus on ensuring ethnic and other minority representation of participants, although  
10 participants will need to respond in English to be able to take part; we will link with relevant  
11 organisations to facilitate this.  
12

13 We will offer to include and support adults with mild learning disability or poor English literacy  
14 in focus groups, where they would like to take part. We have created 'easy read' versions of  
15 our information sheets, to encourage parents/carers with low levels of literacy to take part. We  
16 have created the survey sections using plain language without compromising subsequent  
17 analysis of responses. We offer the option of a researcher providing telephone support in  
18 completion of the survey.  
19  
20  
21

### 22 Procedure:

23 The parent advisory group will be consulted about the format and running of the focus groups  
24 and the topics to be discussed. Focus groups will aim to provide a preliminary understanding  
25 of the following topics: the range of NHS interventions offered to families of children with  
26 EDSD; who offers them and where these offers are made; the characteristics of children and  
27 their families to whom individual interventions are offered (for example, what ages the  
28 individual interventions are offered at); the dosage (frequency, duration, intensity) of individual  
29 interventions; parents' views of the acceptability of individual interventions; professionals'  
30 views of the acceptability of interventions to clinicians and to families; the facilitators and  
31 barriers to delivering individual interventions in the NHS; parents' and professionals' views of  
32 the effectiveness of individual interventions; parents' and professionals' views on how the  
33 success (and lack of success) of interventions should be measured.  
34  
35  
36  
37

### 38 Analysis:

39 Focus groups will be audio recorded and transcribed verbatim. The transcripts will be  
40 analysed using content analysis (Krippendorff, 2012). Researchers will familiarise themselves  
41 with the transcripts, develop and refine a coding frame from the topic guide and first two  
42 transcripts, code all four transcripts according to the coding frame, and finally map  
43 interventions, their acceptability, effectiveness and measurement. We will seek to understand  
44 the parents' and professionals' views on interventions and will undertake a proportionate  
45 analysis to address the study aims. The data will generate a preliminary overview of  
46 interventions and outcome measures currently used in the NHS, their acceptability,  
47 effectiveness.  
48  
49  
50

## 51 **National Survey of parents and professionals**

### 52 Sample size:

53 We aim to survey at least: 200 parents (parents/guardians/foster carers) of children with  
54 EDSD; 100 nursery and school staff who feed children with EDSD; and 200 NHS professionals  
55 who recommend eating and drinking interventions. There will be no upper limit on the number  
56 of respondents.  
57  
58  
59  
60

### Participants:

Parents will be recruited via national and regional parent networks and parent support organisations such as Special Needs Networks, Parent Carer Forums, Council for Disabled Children, Contact-a-Family, Scope, Cerebra, ASD-UK/Dash, National Autistic Society. We will contact Child Development Teams who reported previously they had services for children with EDSD, and ask clinicians to give out leaflets about the survey to parents of children with EDSD, and to place advertisements about the survey in waiting room areas. From previous responses to surveys advertised through the databases and networks above, we anticipate that at least 200 parents will respond within an eight week period.

Health professionals will be recruited from neurodisability and community paediatric networks in the co-applicant regions and professional bodies such as the British Academy of Childhood Disability which has a database of Child Development Teams; British Association of Community Child Health; British Society of Paediatric Gastroenterology, Hepatology and Nutrition; Royal College of Speech and Language Therapists; British Psychological Society; College of Occupational Therapy; British Dietetic Association. Advertisements will be placed in the newsletters, Facebook pages and Twitter feeds of the relevant bodies.

Nursery and school staff will be recruited via independent, academy and local authority schools in the North East, South East and South West of England. We will also contact school staff through the local education authorities, and directly, as we have for previous projects. We will focus on staff in specialist schools, but will also include staff in mainstream schools where there may be less expertise and confidence. We will also contact professionals involved in early years and childcare, through the database of Early Years providers across England, and the database of an independent specialist centre for early years children with autism.

### Materials:

Advertisements about the survey will contain an online link to the survey. Contact details to request a paper copy of the questionnaires are on the advertisements for respondents who prefer them. To avoid duplication, the survey contains a statement for respondents to confirm that they have not completed the survey previously.

### Procedure:

We will use the focus group data and findings from the updated systematic reviews to develop a survey of the current use of EDSD interventions across the UK and the evaluation of their success. Three parallel versions of the survey will be used: one for parents/carers of children with EDSD, one for education staff who feed children at nursery or school, and one for professionals who recommend interventions for EDSD.

The parent advisory group will advise on the draft content of the survey to finalise its content and presentation. A draft version will be piloted with three members of school staff (from local specialist and mainstream schools) and three health professionals (one speech and language therapist, one paediatrician, and one other allied health professional). Cognitive interviewing techniques will be used to check respondents' understanding of the individual questions and instructions, and the acceptability of the survey.

The survey will be open for at least 4 weeks. One reminder about the survey will be sent every two weeks via social media. Respondents will have the option to enter a prize draw to win one of five £100 shopping vouchers for each survey (Drummond et al., 2013). At the end of the survey respondents will be asked to provide their contact details if they would like to be

1  
2  
3 contacted about the findings of the survey and if they would like to be included in the Delphi  
4 survey, later in the study.  
5  
6  
7  
8  
9  
10

### 11 Analysis:

12 Quantitative survey responses will be analysed using descriptive statistics. Analysis will focus  
13 on detecting differences in responses from different groups of parents and professionals – for  
14 example, by geographical region, or by physical vs non-physical EDS. From parents'  
15 responses and those of education staff who feed children with EDS, we will ascertain which  
16 interventions have been received, which are viewed as most effective, which are considered  
17 most acceptable, and which outcomes are deemed most important. From professionals'  
18 responses we will determine what 'treatment as usual' comprises. Specifically, we will  
19 ascertain: which interventions are most frequently offered; to whom they are offered; how they  
20 are delivered; how parents and staff are trained to use them; which outcomes are measured;  
21 and which measurement tools are used. Then regarding each intervention, we will identify:  
22 Who delivers training to parents or nursery/school staff? How frequently is the intervention  
23 used, and for how long? Where is it used? How is progress assessed and what tools are used  
24 to measure this? Do professionals think the intervention is effective and over what timescale?  
25 Thematic analysis will be used for free text responses.  
26  
27

28 Findings from the survey will be discussed by the research group, and with the parent advisory  
29 group. Summaries of findings will be created by the project team and parent advisory group  
30 and will be placed on the project webpage. Links to the page will be forwarded to all networks  
31 used to advertise the survey and all UK Child Development Teams.  
32  
33  
34

### 35 4.2.2 Addressing Aim 2: Systematic Reviews, Evidence Mapping Review, Review of 36 Measurement Properties of Tools, and Evidence Synthesis

#### 37 38 39 **Update of systematic reviews (including search strategy)**

40  
41 We will update three high quality systematic reviews on the effectiveness of interventions for  
42 EDS in children with cerebral palsy/non-progressive neurological impairment:  
43  
44

- 45 • Marshall et al., 2015 (EDS in children with autism spectrum disorder)
- 46 • Morgan et al., 2012 (interventions for EDS in children with physical problems)
- 47 • The forthcoming National Institute for Health and Care Excellence (NICE)  
48 management of cerebral palsy guidance due to be published in January 2017  
49 (Pennington is an advisor)

50  
51 These reviews are of the effectiveness evidence base for physical and non-physical feeding  
52 interventions. Two of the reviews' authors (Marshall in Brisbane and Morgan in Melbourne)  
53 have agreed to be advisors and to collaborate with us through email and  
54 teleconference/skype.  
55

56 Marshall will provide the search strategy for the ASD review. Morgan will be updating her  
57 review in 2017 and will provide the research team with access to preliminary findings. The  
58 review by NICE will be updated using the published search strategies. Updated searches will  
59 be limited to one year before the date of the last searches undertaken for the primary review,  
60

1  
2  
3 allowing for database update delays. The reviews by NICE and Morgan complement each  
4 other. Morgan's review considers interventions for children with 'neurologically based  
5 oropharyngeal dysphagia'. Studies evaluated in that review included participants with CP (2  
6 studies) and muscular dystrophy (1 study). It is possible that the updated review will include  
7 participants with other neurological disorders (e.g. acquired brain injury) and identify CP  
8 studies included in the NICE review. The NICE guideline will review interventions specifically  
9 for children with CP but are not confining interventions to those for 'oropharyngeal dysphagia  
10 and are considering EDSD more broadly, appraising the evidence for the 'management of  
11 eating, drinking and swallowing difficulties of children and young people with cerebral palsy'  
12 ([https://www.nice.org.uk/guidance/qid-cqwave0687/resources/cerebral-palsy-sc-draft-  
13 scope2](https://www.nice.org.uk/guidance/qid-cqwave0687/resources/cerebral-palsy-sc-draft-scope2)). Updating the three reviews (Marshall, Morgan, NICE) will therefore ensure that all  
14 interventions with high quality evidence that are applicable to children with ASD and CP are  
15 evaluated. However, the evidence mapping review (below) will ensure we also take account  
16 of children with neurodisability not due to ASD or CP.  
17  
18

19 The methods of the primary systematic reviews will be followed. Two researchers will  
20 independently screen titles and abstracts to identify studies meeting the inclusion criteria. Full  
21 text of potentially eligible articles will be retrieved and assessed by two researchers. Data  
22 extraction will be conducted in line with that of the primary review, with particular attention  
23 to the outcomes measured and the tools used. Data will be extracted by one researcher and  
24 checked by a second reviewer. Quality assessment and synthesis will also be conducted in  
25 the same manner as the primary reviews.  
26

### 27 **Evidence mapping review and search strategy**

28  
29 The main purpose of the mapping review is to undertake an appropriate and proportionate  
30 approach to understanding the evidence base beyond that summarised in the updated  
31 systematic reviews.  
32

33 We will specifically seek to identify interventions with lower levels of evidence than those  
34 included in the systematic reviews and information on feasibility and acceptability of  
35 interventions, outcomes and measures. The review will cover quantitative and qualitative  
36 studies. We will work with an information specialist, to augment the search strategies used in  
37 the three systematic reviews, and tailor these to individual databases in health and social care,  
38 management and information technology. Searches for the mapping review will be from 2000  
39 onwards. Databases will include MEDLINE, MEDLINE In-Process, EMBASE, CINAHL,  
40 PsycInfo, ASSIA, SocialCare Online, The Cochrane Library (includes CDSR, DARE,  
41 CENTRAL, NHS EED), British Nursing Index, Health Business Elite. Grey literature of relevant  
42 interventions, evaluations or initiatives will be sought via Google, NHS Evidence, The Health  
43 Management Information Consortium, websites of organisations such as The Kings Fund,  
44 Nuffield Trust, Health Foundation, Social Care Institute for Excellence, NICE and relevant  
45 charitable organisations. The following trial registers will also be searched: ClinicalTrials.gov  
46 and Current Controlled Trials. In addition, experts in eating, drinking and neurodisability will  
47 be consulted for potentially relevant studies of case series.  
48  
49

50 In order to organise and categorise the literature, we will develop a descriptive framework  
51 based on a small sample of relevant studies, the three updated systematic reviews and the  
52 advice of the parent advisory group. This framework will be developed iteratively, but is  
53 expected to be based on elements such as child population (age range, physical/non-physical  
54 condition and its severity); type/purpose of intervention; study design; delivery of intervention  
55 (parents/carers/school staff/professional); outcomes measured and tools used; preferences of  
56 parents and professionals in these areas, in addition to other important characteristics of  
57 intervention or populations that are deemed relevant. Data extraction will not be exhaustive  
58 and for some of the elements no more than presence or absence will be reported. Evidence  
59 identified through the mapping review will not be quality assessed.  
60

1  
2  
3  
4 The mapped evidence will be summarised descriptively, and key recurring findings will be  
5 used to inform structured evidence summaries. These summaries will provide information and  
6 context for the survey, subsequent focus groups and Delphi survey, and the trial framework.  
7  
8  
9  
10

## 11 **Review of outcome measurement tools**

12  
13 From the updates of the systematic review, the mapping review and the focus groups, the  
14 most frequently used outcome measurement tools will be identified. We will then assess their  
15 measurement properties by conducting a proportionate (rather than comprehensive)  
16 exploration of relevant literature. OVID will be searched for papers about the identified tools  
17 which describe their properties when used with children with neurodisabilities. We will also  
18 use an existing review and any relevant references in its bibliography (Benfer, Weir, & Boyd,  
19 2012) on the clinimetric properties of measures of oropharyngeal dysphagia in cerebral  
20 palsy/neurological impairment. We will also inspect manuals of standardised tools.  
21  
22

23 Properties of the papers and of the tools will be appraised using the COSMIN checklist  
24 (Terwee et al. 2012). McConachie has training in this method. The evidence will be combined  
25 with the findings of the professional survey in order to draw conclusions about the most robust  
26 and acceptable tools for a trial(s).  
27

### 28 4.2.3 Addressing Aim 3: Trial frameworks and specification

29  
30 In order to develop trial frameworks, the evidence from the synthesis to date will be reviewed  
31 at a second round of focus groups; then consensus on trial components will be sought through  
32 a Delphi survey. Finally, following further synthesis, we will convene two national consensus  
33 workshops.  
34

### 35 **Second round of focus groups**

36  
37 Focus groups will include six participants each: two groups for parents of young children with  
38 physical EDSD; two for parents of young children with non-physical EDSD; two for  
39 professionals of young children with physical EDSD; two for professionals of young children  
40 with non-physical EDSD; one to two for young people with physical EDSD; one to two for  
41 young people with non-physical EDSD. Note that the young people may have communication  
42 difficulties, but we will recruit individuals of an age and ability to consent to participate and give  
43 information about the topics in the topic guide. The clinical academic researchers have  
44 extensive experience of undertaking discussion groups with young people with additional  
45 communication needs.  
46

47 The four parent and four professional focus groups (48 participants in total) will be conducted  
48 in Newcastle (parents and professionals), Exeter (parents) and at Chailey Clinical Services,  
49 Sussex (professionals). The young people's groups will all take place in the North East region.  
50 Parents and young people will receive a £50 shopping voucher to thank them for their time,  
51 and also cover any travel and parking costs.  
52

### 53 Participants:

54  
55 Some of the parents and professionals who stated that they wished to be contacted about  
56 future stages of the research will be invited to the focus groups – parents will be purposively  
57 sampled from those within 30 miles of Newcastle and Exeter (where parent groups will be  
58 held). We will aim for diversity of participants in regard to their child's severity of impairment  
59  
60



1  
2  
3 and family characteristics (including ethnicity and where they live). Groups for professionals  
4 will be multidisciplinary and a mix of genders. Professionals within 50 miles of Newcastle and  
5 Chailey will be invited to attend. Eight to twelve young people with EDS aged 12-18 years  
6 who are known to professionals and parents around Newcastle and who are considered able  
7 to participate in small discussion groups will be identified; young person groups will take place  
8 in locations across the North East of England (Newcastle and the south of the region). Young  
9 people will be given written, verbal and pictorial information about the study and will be  
10 encouraged to discuss this with their parents or professional. If more than 12 young people  
11 wish to take part, they will be purposively selected to ensure there is mix of genders and  
12 diagnoses.

### 13 14 15 16 Materials:

17 Before the focus groups, we will ensure that young people who use augmentative and  
18 alternative communication (AAC) systems have the necessary vocabulary to discuss relevant  
19 themes. The research team will ask parents and relevant professionals to add new vocabulary  
20 items to young people's AAC systems where necessary.

21 Focus group participants will receive written, verbal and pictorial summaries of the findings of  
22 the survey and evidence reviews. They will be shown the candidates for future research – the  
23 interventions, valued outcomes and measurement tools. Participants will be asked for their  
24 views on the acceptability of the candidates and, if multiple candidates have been determined,  
25 their prioritisation for future investigation. Discussion in groups of young people will be  
26 facilitated by use of pictures, photographs and techniques such as Talking Mats to elicit  
27 preferences; other techniques will be necessary - we know from clinical practice and our  
28 research, that young people will use their own total communication approach in discussions.

### 29 30 31 32 33 Analysis:

34 Focus groups will be audio recorded and transcribed verbatim. Photographs will be taken of  
35 all Talking Mats created by young people. Analysis of the data will be based on the Framework  
36 approach (Spencer, Ritchie, & O'Connor, 2003) and will generate an understanding of the  
37 views of parents, young people and professionals on which individual interventions, outcomes  
38 and measurement tools that are supported by current research, could be tested in research,  
39 which should be prioritised (and their rationale for this) and which are inappropriate for further  
40 testing. Findings from the focus groups will be discussed by the team and our parent advisory  
41 group.

### 42 43 44 45 **National Delphi survey**

46 A national Delphi survey will be undertaken to seek consensus on the candidate trial  
47 components: interventions, outcomes, measurement tools and a definition of 'treatment as  
48 usual' (for comparator treatment), and to prioritise interventions for future research.  
49 Statements will be generated from the synthesis of the data from the focus groups, mapping  
50 review and updates of the systematic reviews.

### 51 52 53 Participants:

54 Parents and professionals who took part in the earlier survey and focus groups will be invited  
55 to take part in the Delphi survey; we aim for 100 - 200 respondents. Parents and professionals  
56 who did not take part in the earlier survey will also be invited to participate in the Delphi through  
57 the networks and organisations listed above.

### Materials:

A survey will be developed to elicit parents' and professionals' judgements on the suitability of components for future trials: interventions, participant groups, outcomes, measurement tools and 'treatment as usual'. In the first phase of the Delphi survey participants will be asked to rate their agreement with statements about whether individual trial components should be included in future research (i.e. that a component is appropriate for further investigation). The second phase of the Delphi survey will aim for consensus between participants on prioritisation; for example, which interventions should be tested first in the NHS; which outcomes should be primary outcomes, and which should be secondary outcomes. We realise there may be systematic differences between parent and professional responses and these will be explored by discussions with the parent advisory group. All statements will have a rating scale on which participants indicate their agreement: for example, strongly disagree, disagree, no opinion, agree, strongly agree. The surveys used in each phase will be developed by the research team in consultation with the parent advisory group. They will be piloted with three professionals (one paediatrician, one speech and language therapist and one other allied health professional) using cognitive interviewing techniques to elicit respondents' understanding of the instructions and statements tested. We envisage at least three rounds of the survey will be needed to achieve consensus on prioritisation of trial components. The survey will be administered online using Qualtrics.

### Procedure:

Advertisements for the survey will also be placed in electronic newsletters of the parent and professional groups and the Twitter feeds and Facebook pages used in Aim 1, to encourage responses and to allow people who did not take part in previous phases of the study to add their views. Participants who take part will be offered the opportunity to enter a draw to win one of five £100 shopping vouchers for each survey.

### Analysis:

Consensus level for the Delphi analysis will be set at 67% (Sinha, Smyth, & Williamson, 2011); we will work with the parent advisory group on responses where there are different views between parents and professionals. Statements on which there is agreement will be identified using descriptive statistics. Thematic analysis will be used for free text responses.

## **Evidence Synthesis**

We will generate structured evidence summaries from the updated systematic reviews, the mapping review, the surveys and the focus groups. Each summary will outline relevant aspects of the research evidence and highlight where there are evidence gaps. Content will include a description of the intervention, the population(s) to whom it may be delivered, the perceived potential target groups for the intervention, the characteristics of the published evidence to support, the level of professional and parent support. The final structure will be determined in collaboration with both the clinical and parent advisory group.

Then we will produce summaries of the elements identified as priorities in the Delphi survey. These summaries, which will form part of the evidence presented at the national consensus meetings, will show how the preferences of parents and professionals relate to the evidence base and the feasibility of delivering alternative interventions. These summaries should ensure that all elements of the work are presented in a transparent, consistent and useful format that will enable dissemination and discussion.

## **Two national consensus workshops regarding potential trials**

Two national consensus workshops will be held in months 19-20. One workshop will be in Newcastle and one in London. One will focus on potential trials of interventions for children with physical EDSD, the other on trials for non-physical EDSD. A mix of about 20 parents, health and education professionals and people with relevant experience of neurodisability trials will be invited to the meeting. Data from the evidence synthesis, the second phase of focus groups and the Delphi survey will be summarised before the meetings, and circulated, together with some defined topics for discussion. The agenda will be set so that decisions are made in a stepwise fashion – for example, discussions about outcomes to be measured will follow discussion about the properties of the most appropriate and available measurement tools. The aim of the workshops will be to draw together all the available evidence to suggest a framework and outcomes for one or more substantive pragmatic trial(s) of interventions for children with physical and non-physical EDSD. If it is not possible to recommend a trial framework, we will consider what additional evidence about interventions, outcomes and measurement approaches is needed to support one or more future trials. The national consensus workshops are the last point of participant involvement and are planned to be finished by June 2019.

## **5) Dissemination and Outputs**

### **5.1 Dissemination**

We will start dissemination following Stage 1, by sending newsletters to participants and through organisations. We will create a project website.

In addition to our report to HTA and possible publication in the HTA journal, we will prepare one article for submission to a major journal in child health or child disability. We will present the findings at the British Academy of Childhood Disability annual meeting, and at the European Academy of Childhood Disability annual meeting – this focuses on conditions such as cerebral palsy, autism spectrum disorder and others. If possible we will present data at the International Meeting for Autism Research.

We will offer to present our findings at regional neurodisability meetings – parents and professionals often attend these. We will share information with clinical networks through speciality groups and Royal Colleges, and others through whom we link during the project, for example voluntary sector organisations and parent carer forums.

Parent co-investigators and members of the parent advisory group, supported by researchers, will disseminate the findings through written summaries for parent and professional participants from the project respectively, and national charities (for example the National Autistic Society, Autistica and Research Autism (Newcastle links) and Cerebra (PenCRU links); we hope parent co-applicants and members of the parent advisory group will also contribute an article to the INVOLVE newsletter. Parent co-investigators and members of the parent advisory group working with us will present the findings at parent/carers meetings wherever possible – otherwise another co-applicant will attend.

Our previous research experience tells us that different groups within the community prefer different formats and dissemination routes (for example, many adults on the autism spectrum prefer social media, many older parents prefer paper, younger people make more use of web based approaches). We will aim to accommodate the preferences of all audiences and tailor dissemination formats, methods and content for the people to whom it is directed. We will provide feedback findings to end-users following each research stage to build and maintain engagement.

We will use printed materials, email and social media for dissemination, as well as webinars and YouTube videos that can be distributed on line or through Facebook or Twitter.

Finally, we will share our findings with research partners in other countries, to ensure best use of the results (for example, colleagues in Australia).

## 5.2 Outputs

These will include: Identification of the most promising interventions for young children with physical and non-physical EDSD; specification of the patient groups on whom the intervention(s) should be tested, and whether one or more exemplar conditions should be considered for a trial; what 'treatment as usual' should comprise in a future trial, and its acceptability; selection of the key outcomes to be measured; recommendation of the tools that could be used. Identification of a suggested framework and outcomes for one or more substantive pragmatic trial(s); or if it is not possible to recommend a trial framework, we will set out what additional evidence about interventions, outcomes and measurement approaches is needed to justify a trial.

## 6) Study management

Parr will have overall responsibility for the project, and will complete progress reports and financial reporting to NIHR, the Sponsor and ethics committee. Parr and Pennington will lead day to day working.

Co-applicants will speak together at least 3 monthly during the project (in-person meetings or via teleconference). A multidisciplinary National Advisory Group will be recruited. This group will have a wide geographical distribution and include researchers and professionals with experience in Paediatric Neurodisability including Paediatricians, Speech and Language Therapists and other allied health professionals or Clinical Psychologists. The group will comprise of 4-6 people and will meet up to 4 times during the study,

Newcastle upon Tyne Hospitals NHS Foundation Trust is the research sponsor and lead NHS Trust.

## 7) Patient and Public Involvement

A parent advisory group will meet 6-8 times to discuss specific topics – including those arising from recent stages and findings, and to prepare for the next phase. Specific examples of the purpose of the 2 hour parent advisory meetings include (but are not limited to) the following: Initial advice on methods and materials, including how to best conduct Stage 1 focus groups; review survey information sheet and consent forms; assist review of the results from the evidence synthesis and prepare for Stage 2 focus groups, including the discussion with young people; consider the Delphi survey content; prepare for the consensus workshops; a final meeting to guide dissemination of the results to parents and young people.

One of two parent co-investigators will lead the parent advisory groups, together with researchers. A parent co-applicant will attend Newcastle parent groups, and will lead parent involvement for the consensus meetings. With Parr, parent co-investigators will lead dissemination of the project results to parents through networks and voluntary sector organisations.

## 8) Research team

Newcastle University / Newcastle upon Tyne Hospitals NHS Foundation Trust

Parr is a Clinical Senior Lecturer and Consultant in Paediatric Neurodisability, and leads a Tertiary neurodisability feeding service.

Pennington is a Senior Lecturer in Speech and Language Therapy.

Craig is a Principal Scientist with expertise in evidence synthesis.

Colver is Professor of Community Child Health.

McConachie is Professor of Child Clinical Psychology.

McColl previously directed the Newcastle Clinical Trials Unit.

Thomas is a Consultant Gastroenterologist

Buswell is a Speech and Language Therapist

Cadwgan is a Consultant in Paediatric Neurodisability (now based at Guy's and St Thomas' Hospital

Taylor is the Clinical Research Associate on the study

Two parent co-investigators work as part of the research team – one is a parent of a young person with physical disability, and the other is a parent of a young person on the autism spectrum

University of Exeter Peninsula Cerebra Research Unit (PenCRU)

Morris is a Senior Health Service Researcher and leads PenCRU.

Chailey Clinical Services, Sussex

Sellers is a clinical and academic Speech and Language Therapist.

**9) References**

- Andrew, M. J., Parr, J. R., & Sullivan, P. B. (2012). Feeding difficulties in children with cerebral palsy. *Archives of disease in childhood - Education & practice edition*. doi:10.1136/archdischild-2011-300914
- Benfer, K. A., Weir, K. A., & Boyd, R. N. (2012). Clinimetrics of measures of oropharyngeal dysphagia for preschool children with cerebral palsy and neurodevelopmental disabilities: a systematic review. *Developmental Medicine & Child Neurology*, 54(9), 784-795. doi:10.1111/j.1469-8749.2012.04302.x
- Craig, P., Dieppe, P., Macintyre, S., Michie, S., Nazareth, I., & Petticrew, M. (2008). *Developing and evaluating complex interventions: new guidance*. London: Medical Research Council.
- Drummond, M. F., Tarricone, R., & Torbica, A. (2013). Assessing the added value of health technologies: reconciling different perspectives. *Value in Health*, 1(7), s7-s13.
- Gray, L., Gibbs, J., Jolleff, N., Williams, J., McConachie, H., Parr, J.R. (2015) Variable implementation of good practice recommendations for the assessment and management of UK children with neurodisability. *Child: Care, Health and Development*, 41(6), 938-946
- Kitzinger J. Qualitative Research: Introducing focus groups *BMJ* 1995;311:299
- Krippendorff, K. (2012). *Content analysis: an introduction to its methodology*. Los Angeles: Sage.
- Marshall, J., Ware, R., Ziviani, J., Hill, R. J., & Dodrill, P. (2015). Efficacy of interventions to improve feeding difficulties in children with autism spectrum disorders: a systematic review and meta-analysis. *Child: Care, Health and Development*, 41(2), 278-302. doi:10.1111/cch.12157
- McConachie, H., Parr, J. R., Glod, M., Hanratty, J., Livingstone, N., Oono, I. P., . . . Williams, K. (2015). Systematic review of tools to measure outcomes for young children with autism spectrum disorder. *Health Technol Assess*, 19(41). doi:10.3310/hta19410

- 1  
2  
3 Morgan T, Dodrill P, Ward EC. (2012). Interventions for oropharyngeal dysphagia in children  
4 with neurological impairment. *Cochrane database of systematic reviews (Online)*, 10.  
5  
6 Morris, C., Janssens, A., Allard, A., Thompson-Coon, J., Shilling, V., Tomlinson, R., . . .  
7 Jenkinson, C. (2014). Informing the NHS Outcomes Framework: evaluating  
8 meaningful health outcomes for children with neurodisability using multiple methods  
9 including systematic review, qualitative research, Delphi survey and consensus  
10 meeting. *Health Service Delivery Research*, 2(15)  
11  
12 Morris, C., Simkiss, D., Busk, M., Morris, M., Allard, A., Denness, J., .... Cowan, K. (2015).  
13 Setting research priorities to improve the health of children and young people with  
14 neurodisability: a British Academy of Childhood Disability-James Lind Alliance  
15 Research Priority Setting Partnership. *BMJ Open*, 5(1): e006233  
16  
17 Murphy, J., & Cameron, L. (2008). The effectiveness of Talking Mats for people with  
18 intellectual disability *British Journal of Learning Disability*, 36, 232-241.  
19  
20 Parr, J. R., Jolleff, N., Gray, L., Gibbs, J., Williams, J., & McConachie, H. (2013). Twenty years  
21 of research shows UK child development team provision still varies widely for children  
22 with disability. *Child: Care, Health and Development*, 39(6), 903-907.  
23 doi:10.1111/cch.12025  
24  
25 Parr, J.R., Weldon, E., Pennington, L., Steen, N., Williams, J., Fairhurst, C., O'Hare, A., Lodh,  
26 R., Colver, A. (2014). The drooling reduction intervention trial (DRI): a single blind trial  
27 comparing the efficacy of glycopyrronium and hyoscine on drooling in children with  
28 neurodisability. *Trials*, 15, 60  
29  
30 Sellers, D., Mandy, A., Pennington, L., Hankins, M., & Morris, C. (2014). Development and  
31 reliability of a system to classify the eating and drinking ability of people with cerebral  
32 palsy. *Developmental Medicine & Child Neurology*, 56(3), 245-251.  
33 doi:10.1111/dmcn.12352  
34  
35 Sinha, I. P., Smyth, R. L., ., & Williamson, P. R. (2011). Using the Delphi technique to  
36 determine which outcomes to measure in clinical trials: recommendations for the future  
37 based on a systematic review of existing studies. *PLOS Medicine*, 8(1), e1000393  
38  
39 Spencer, L., Ritchie, J., & O'Connor, W. (2003). Analysis: practices, principles and processes.  
40 In J. Ritchie & J. Lewis (Eds.), *Qualitative research practice: a guide for social science*  
41 *students and researchers* (pp. 199-218). London: Sage.  
42  
43 Sullivan, P. B. (2009). *Feeding and Nutrition in Children with Neurodevelopmental Disability*.  
44 London: Mac Keith Press.  
45  
46 Terwee CB, Mokkink LB, Knol DL, Ostelo RWJG, Bouter LM, de Vet HCW. Rating the  
47 methodological quality in systematic reviews of studies on measurement properties: a  
48 scoring system for the COSMIN checklist. *Qual Life Res* 2012;21:651-657  
49  
50 Warnell, F., George, B., McConachie, H., Johnson, M., Hardy, R., & Parr, J. R. (2015).  
51 Designing and recruiting to UK autism spectrum disorder research databases: do they  
52 include representative children with valid ASD diagnoses? *BMJ Open*, 5(9), e008625.  
53  
54 Watson, R. M., & Pennington, L. (2015). Assessment and management of the communication  
55 difficulties of children with cerebral palsy: A UK survey of SLT practice. *International*  
56 *Journal of Language and Communication Disorders*, 50(2), 241-259.  
57 doi:10.1111/1460-6984.12138  
58  
59 Winburn, E., Charlton, J., McConachie, H., McColl, E., Parr, J. R., O'Hare, A., . . . Le  
60 Couteur, A. (2013). Parents' and child health professionals' attitudes towards dietary  
interventions for children with autism spectrum disorders. *Journal of Autism and  
Developmental Disorders*, 44, 747-757.

# BMJ Paediatrics Open

## Developing the FEEDS Toolkit of parent-delivered interventions for eating, drinking and swallowing difficulties in young children with neurodisability: Findings from a Delphi survey and stakeholder consultation workshops

|                               |                                                                                                                                                                                                                                                                                                                                                                                                                                                                                                                                                                                                                                                                                                                                                                                                                                                                                                                                                                                                                                                                                                                                                                                                                                                                                                                                                                                                                                                                                                                                                                                                                                   |
|-------------------------------|-----------------------------------------------------------------------------------------------------------------------------------------------------------------------------------------------------------------------------------------------------------------------------------------------------------------------------------------------------------------------------------------------------------------------------------------------------------------------------------------------------------------------------------------------------------------------------------------------------------------------------------------------------------------------------------------------------------------------------------------------------------------------------------------------------------------------------------------------------------------------------------------------------------------------------------------------------------------------------------------------------------------------------------------------------------------------------------------------------------------------------------------------------------------------------------------------------------------------------------------------------------------------------------------------------------------------------------------------------------------------------------------------------------------------------------------------------------------------------------------------------------------------------------------------------------------------------------------------------------------------------------|
| Journal:                      | <i>BMJ Paediatrics Open</i>                                                                                                                                                                                                                                                                                                                                                                                                                                                                                                                                                                                                                                                                                                                                                                                                                                                                                                                                                                                                                                                                                                                                                                                                                                                                                                                                                                                                                                                                                                                                                                                                       |
| Manuscript ID                 | bmjpo-2022-001425.R1                                                                                                                                                                                                                                                                                                                                                                                                                                                                                                                                                                                                                                                                                                                                                                                                                                                                                                                                                                                                                                                                                                                                                                                                                                                                                                                                                                                                                                                                                                                                                                                                              |
| Article Type:                 | Original research                                                                                                                                                                                                                                                                                                                                                                                                                                                                                                                                                                                                                                                                                                                                                                                                                                                                                                                                                                                                                                                                                                                                                                                                                                                                                                                                                                                                                                                                                                                                                                                                                 |
| Date Submitted by the Author: | 07-Mar-2022                                                                                                                                                                                                                                                                                                                                                                                                                                                                                                                                                                                                                                                                                                                                                                                                                                                                                                                                                                                                                                                                                                                                                                                                                                                                                                                                                                                                                                                                                                                                                                                                                       |
| Complete List of Authors:     | <p>Taylor, Helen; Newcastle University, Population Health Sciences Institute Pennington, lindsay; Newcastle University, Population Health Sciences Institute; Newcastle Upon Tyne Hospitals NHS Foundation Trust, Great North Children's Hospital</p> <p>Morris, Christopher; University of Exeter Medical School, Peninsula Childhood Disability Research Unit (PenCRU), Institute of Health Research</p> <p>Craig, Dawn; Newcastle University, Population Health Sciences Institute</p> <p>McConachie, Helen; Newcastle University, Population Health Sciences Institute</p> <p>Cadwgan, Jill; Evelina London Children's Hospital, Paediatric Neurosciences</p> <p>Sellers, Diane; Sussex Community NHS Foundation Trust, Chailey Clinical Services</p> <p>Andrew, Morag; Newcastle Upon Tyne Hospitals NHS Foundation Trust, Great North Children's Hospital</p> <p>Smith, Johanna; Newcastle University, Patient and Public Involvement</p> <p>Garland, Deborah; National Autistic Society</p> <p>McColl, Elaine; Newcastle University, Population Health Sciences Institute</p> <p>Buswell, Charlotte; Newcastle Upon Tyne Hospitals NHS Foundation Trust, Great North Children's Hospital</p> <p>Thomas, Julian; Newcastle University, Population Health Sciences Institute; Newcastle Upon Tyne Hospitals NHS Foundation Trust, Great North Children's Hospital</p> <p>Colver, Allan; Newcastle University, Population Health Sciences Institute</p> <p>Parr, Jeremy ; Newcastle University, Population Health Sciences Institute; Newcastle Upon Tyne Hospitals NHS Foundation Trust, Great North Children's Hospital</p> |
| Keywords:                     | Neurodisability, Neurology, Therapeutics, Growth, Health services research                                                                                                                                                                                                                                                                                                                                                                                                                                                                                                                                                                                                                                                                                                                                                                                                                                                                                                                                                                                                                                                                                                                                                                                                                                                                                                                                                                                                                                                                                                                                                        |
|                               |                                                                                                                                                                                                                                                                                                                                                                                                                                                                                                                                                                                                                                                                                                                                                                                                                                                                                                                                                                                                                                                                                                                                                                                                                                                                                                                                                                                                                                                                                                                                                                                                                                   |

1  
2  
3  
4  
5  
6  
7  
8  
9  
10  
11  
12  
13  
14  
15  
16  
17  
18  
19  
20  
21  
22  
23  
24  
25  
26  
27  
28  
29  
30  
31  
32  
33  
34  
35  
36  
37  
38  
39  
40  
41  
42  
43  
44  
45  
46  
47  
48  
49  
50  
51  
52  
53  
54  
55  
56  
57  
58  
59  
60

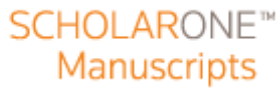





I, the Submitting Author has the right to grant and does grant on behalf of all authors of the Work (as defined in the below author licence), an exclusive licence and/or a non-exclusive licence for contributions from authors who are: i) UK Crown employees; ii) where BMJ has agreed a CC-BY licence shall apply, and/or iii) in accordance with the terms applicable for US Federal Government officers or employees acting as part of their official duties; on a worldwide, perpetual, irrevocable, royalty-free basis to BMJ Publishing Group Ltd ("BMJ") its licensees and where the relevant Journal is co-owned by BMJ to the co-owners of the Journal, to publish the Work in this journal and any other BMJ products and to exploit all rights, as set out in our [licence](#).

The Submitting Author accepts and understands that any supply made under these terms is made by BMJ to the Submitting Author unless you are acting as an employee on behalf of your employer or a postgraduate student of an affiliated institution which is paying any applicable article publishing charge ("APC") for Open Access articles. Where the Submitting Author wishes to make the Work available on an Open Access basis (and intends to pay the relevant APC), the terms of reuse of such Open Access shall be governed by a Creative Commons licence – details of these licences and which [Creative Commons](#) licence will apply to this Work are set out in our licence referred to above.

Other than as permitted in any relevant BMJ Author's Self Archiving Policies, I confirm this Work has not been accepted for publication elsewhere, is not being considered for publication elsewhere and does not duplicate material already published. I confirm all authors consent to publication of this Work and authorise the granting of this licence.

1  
2  
3 **Developing the FEEDS Toolkit of parent-delivered interventions for eating,**  
4 **drinking and swallowing difficulties in young children with neurodisability:**  
5 **Findings from a Delphi survey and stakeholder consultation workshops**  
6  
7  
8  
9

10  
11 Helen Taylor<sup>1</sup>, Lindsay Pennington<sup>1,2</sup>, Christopher Morris<sup>3</sup>, Dawn Craig<sup>1</sup>, Helen  
12 McConachie<sup>1</sup>, Jill Cadwgan<sup>4</sup>, Diane Sellers<sup>5</sup>, Morag Andrew<sup>2</sup>, Johanna Smith<sup>6</sup>,  
13 Deborah Garland<sup>7</sup>, Elaine McColl<sup>1</sup>, Charlotte Buswell<sup>2</sup>, Julian Thomas<sup>1,2</sup>, Allan  
14 Colver<sup>1</sup>, Jeremy Parr<sup>1,2</sup>.  
15  
16  
17  
18

19  
20 <sup>1</sup> Population Health Sciences Institute, Newcastle University, Newcastle upon Tyne,  
21 UK  
22

23 <sup>2</sup> Great North Children's Hospital, Newcastle upon Tyne Hospitals NHS Foundation  
24 Trust, Newcastle upon Tyne, UK  
25

26 <sup>3</sup> Peninsula Childhood Disability Research Unit (PenCRU), Institute of Health  
27 Research, University of Exeter Medical School, University of Exeter, Exeter, UK  
28

29 <sup>4</sup> Evelina London Children's Hospital, Guys and St Thomas' NHS Foundation Trust,  
30 King's Health Partners, London, UK  
31

32 <sup>5</sup> Sussex Community NHS Foundation Trust, Chailey Clinical Services, Sussex, UK  
33

34 <sup>6</sup> Patient and Public Involvement, Newcastle University, Newcastle upon Tyne, UK  
35

36 <sup>7</sup> National Autistic Society, London, UK  
37  
38  
39

40 Corresponding Author:

41  
42 Professor Jeremy R Parr

43  
44 Email: [Jeremy.Parr@ncl.ac.uk](mailto:Jeremy.Parr@ncl.ac.uk)  
45

46 Address: Population Health Sciences, Newcastle University, Level 3, Sir James  
47 Spence Institute, Royal Victoria Infirmary, Queen Victoria Road, Newcastle upon  
48 Tyne, NE1 4LP  
49  
50

51  
52 Word count: 2620/2500  
53  
54  
55  
56  
57  
58  
59  
60

## ABSTRACT

### Background

Young children with neurodisability commonly experience eating, drinking and swallowing difficulties (EDSD). Little is documented about which interventions and outcomes are most appropriate for such children. We aimed to seek consensus between parents of children with neurodisability and health professionals on the appropriate interventions and outcomes to inform future clinical developments and research studies.

### Methods

Two populations were sampled: parents of children aged up to 12 years with neurodisability who experienced EDSD; health professionals working with children and young people (aged 0-18 years) with neurodisability with experience of EDSD. Participants had taken part in a previous national survey and were invited to take part in a Delphi survey and / or consultation workshops. Two rounds of this Delphi survey sought agreement on the appropriate interventions and outcomes for use with children with neurodisability and EDSD. Two stakeholder consultation workshops were iterative, with the findings of the first discussed at the second, and conclusions reached.

### Results

A total of 105 parents and 105 health professionals took part. Parents and health professionals viewed 19 interventions and 10 outcomes as essential. Interventions related to improvement in the physical aspects of a child's EDSD, behavioural changes of the child or parent, and changes in the child or family's well-being. Both parents and health professionals supported a 'toolkit' of interventions that they could use together in shared decision making to prioritise and implement timely interventions appropriate to the child.

### Conclusions

This study identified interventions viewed as essential to consider for improving EDSD in children with neurodisability. It also identified several key

1  
2  
3 outcomes that are valued by parents and health professionals. The FEEDS Toolkit of  
4 interventions to improve EDSD in children with neurodisability has been developed  
5 and now requires evaluation regarding its use and effectiveness.  
6  
7  
8  
9  
10  
11  
12  
13  
14  
15  
16  
17  
18  
19  
20  
21  
22  
23  
24  
25  
26  
27  
28  
29  
30  
31  
32  
33  
34  
35  
36  
37  
38  
39  
40  
41  
42  
43  
44  
45  
46  
47  
48  
49  
50  
51  
52  
53  
54  
55  
56  
57  
58  
59  
60

Confidential: For Review Only

#### What is known about the subject?

- Children with neurodisability commonly experience eating, drinking and swallowing difficulties (EDSD) that have physical and non-physical causes.
- EDSD have a considerable impact on a child and family.
- A UK survey found a wide range of parent-delivered interventions are recommended by health professionals and used by parents to support young children with neurodisability.

#### What this study adds?

- Agreement from parents and health professionals on the appropriate interventions and outcomes for use with children with neurodisability and EDSD.
- Clarity on the interventions and outcomes to focus on within future research
- A toolkit of interventions was developed for use by health professionals and parents to support children with neurodisability and EDSD.

## INTRODUCTION

Long-term conditions affecting the brain, nerves and muscles are often grouped under the term 'neurodisability' [1]. Children with neurodisability commonly experience eating, drinking and swallowing difficulties (EDSD) that have physical and non-physical causes. Physical causes relate to decreased muscle control and co-ordination, which impairs the safety and efficiency of sucking, chewing and swallowing. Non-physical causes include rigidity or rituals associated with food or mealtimes, and sensory sensitivities to certain textures or flavours; this includes children with Avoidant / Restrictive Food Intake Disorder (ARFID). Physical and non-physical EDSD frequently co-exist (mixed EDSD). EDSD make mealtimes stressful for children and their families and impact negatively on quality of life and social participation. They also lead to inadequate calorie intake or a restricted diet, affecting a child's nutrition, growth and physical health [2].

1  
2  
3 A recent UK survey of parents and health professionals found a wide range of  
4 interventions were used for children with neurodisability who experience EDSD to  
5 address their physiological and behavioural needs [3]. The survey found most  
6 children received multiple interventions. There was a common approach to  
7 addressing EDSD regardless of the cause of the child's difficulties, with the majority  
8 of interventions being used to address all types of EDSD. This survey also identified  
9 a range of important outcomes to measure the effectiveness of interventions.  
10  
11  
12  
13  
14

15  
16 As part of a larger research programme, FEEDS (Focus on Early Eating,  
17 Drinking and Swallowing) [4], this study aimed to:  
18  
19

20 1. Seek consensus between parents and health professionals on which  
21 interventions and outcomes are most appropriate for children with neurodisability  
22 and EDSD.  
23  
24

25 2. Gain consensus between parents of children with neurodisability and health  
26 professionals on which interventions should be evaluated in future research.  
27  
28

29 3. Develop a 'toolkit' of interventions that could be used by health  
30 professionals and parents to support children with EDSD and their families.  
31  
32  
33  
34  
35

## 36 **METHODS**

37  
38 An iterative online Delphi survey and two stakeholder consultation workshops  
39 were undertaken.  
40  
41  
42  
43  
44

### 45 **Delphi survey**

#### 46 **Participants**

47  
48 Invitations to participate were sent to respondents from the FEEDS national  
49 survey [3] who had expressed interest in subsequent research stages. This included:  
50 parents of children (aged up to 12 years) with neurodisability who experienced  
51 EDSD; and health professionals working with children and young people (aged 0-18  
52 years) with neurodisability. Participants were recruited through a wide range of  
53  
54  
55  
56  
57  
58  
59  
60

1  
2  
3 sources, including NHS, professional and parent networks and schools. Full  
4 recruitment strategies are outlined elsewhere [4]  
5  
6  
7  
8

## 9 Measure

10  
11 The questionnaire listed interventions and outcomes identified in earlier  
12 stages of the FEEDS research programme [4], comprising updates of three  
13 systematic reviews [5-7], a mapping review, a national survey and focus groups.  
14 The questionnaire's structure and format was developed with reference to  
15 methodological recommendations [8] and previous experience of Delphi surveys.  
16 The questionnaire contained three sections [1] demographic characteristics; [2]  
17 parent-delivered interventions for young children with neurodisability and EDSD; and  
18 [3] outcomes to measure improvement in EDSD.  
19  
20  
21  
22  
23  
24  
25

26 Questions related to 25 interventions and 22 outcomes (Tables 1 and 2).  
27 Respondents rated the importance of the interventions as part of a treatment  
28 package for EDSD, and the outcomes to measure (using a 9-point scale: 0-3 'not  
29 important', 4-6 'important but not essential', 7-9 'essential'). Respondents could tick  
30 "unable to score". The questionnaire was hosted on Qualtrics [9].  
31  
32  
33  
34  
35  
36  
37  
38  
39  
40  
41  
42  
43  
44  
45  
46  
47  
48  
49  
50  
51  
52  
53  
54  
55  
56  
57  
58  
59  
60

**Table 1. Description of interventions presented in Delphi Survey**

| Intervention                             | Description                                                                                                                                                                                                                                                             |
|------------------------------------------|-------------------------------------------------------------------------------------------------------------------------------------------------------------------------------------------------------------------------------------------------------------------------|
| Modifying environment                    | Changing the physical or social setting at mealtimes (e.g. reducing distractions such as levels of noise; using distractions to reduce a child's attention on their food)                                                                                               |
| Positioning                              | Ensuring a child is in the best position to eat and drink food safely and efficiently (e.g. a child sitting upright providing support for head control)                                                                                                                 |
| Modifying equipment                      | Using different spoons, forks, plates, cups, or bottles (e.g. doidy cup; plastic spoon)                                                                                                                                                                                 |
| Scheduling of meals                      | Setting the timing of mealtimes to encourage a child's appetite and establish a mealtime routine (e.g. spreading meals / snacks throughout the day; setting a 30 minutes limit for mealtimes)                                                                           |
| Modifying consistency of food            | Changing the consistency of the child's food or drink (e.g. pureeing food; thickening food or drink)                                                                                                                                                                    |
| Modifying other aspects of food          | Changing the temperature, taste, amount or presentation of the child's food or drink (e.g. presenting different foods so they do not touch each other; mixing liked foods with disliked foods)                                                                          |
| Modifying placement of food              | Changing where food is placed in a child's mouth to help chewing or swallowing (e.g. placing food to the side of the mouth)                                                                                                                                             |
| Enhancing communication                  | Improving communication between a child and the person feeding them during mealtimes (e.g. offering choices of food to a child; a child using eye pointing or signs or symbols to ask for specific food or drink)                                                       |
| Visual supports                          | Use of pictures, a 'countdown clock', or social stories to increase a child's understanding of what happens during mealtimes (e.g. showing a child pictures of what food will be on their plate; showing a child a story to explain what will happen during a mealtime) |
| Responding to a child's cues for feeding | Helping people to recognise the signs that a child is ready to take another mouthful of food or drink (e.g. looking for breath alterations or repeated swallows from a child to indicate a lack of readiness)                                                           |
| Pace of feeding                          | Changing the speed at which each mouthful of food or drink is taken by a child (e.g. slowing pace down to prevent overfilling of a child's mouth)                                                                                                                       |
| Medication                               | Any medication (e.g. for epilepsy, pain, drooling, tone, gastroesophageal reflux)                                                                                                                                                                                       |
| Energy supplements                       | Any energy or calorie supplement given orally or via feeding tube                                                                                                                                                                                                       |



|                                    |                                                                                                                                                                                                                                                                                                                          |
|------------------------------------|--------------------------------------------------------------------------------------------------------------------------------------------------------------------------------------------------------------------------------------------------------------------------------------------------------------------------|
| Vitamin or nutritional supplements | Any supplements given or changes to a child's diet to increase the vitamins or nutrients in their diet                                                                                                                                                                                                                   |
| Physical support                   | Giving direct physical support to a child when eating or drinking to improve the movements needed to bite, chew and swallow (e.g. placing a thumb underneath the chin to help a child close their mouth)                                                                                                                 |
| Oral and sensory desensitisation   | Activities aimed at reducing a child's adverse reactions to different sensory experiences linked to eating and drinking (e.g. face massage; chewing no-food items such as a chewy 'toothbrush')                                                                                                                          |
| Oral-motor exercises               | Exercises done with a child to improve the control of their mouth, jaw, tongue or lips (e.g. a child moving a non-food item with their tongue; a child sucking through a straw)                                                                                                                                          |
| Graded exposure to new food        | Activities aimed at gradually exposing a child to new or disliked foods and drinks (e.g. messy play activities involving a child touching new or disliked foods; using small steps towards a child accepting new or disliked foods such as licking the food or putting it in their mouth with no expectation to swallow) |
| Graded exposure to new textures    | Activities aimed at gradually introducing a child to more challenging food textures and fluid consistencies (e.g. messy play activities involving a child touching new or disliked textures; using small steps to introduce a child to lumpy food or foods that require chewing)                                         |
| Changing behaviour at mealtimes    | Strategies to encourage a child to behave appropriately at mealtimes (e.g. a child sitting down ready to eat; a child staying seated for the meal)                                                                                                                                                                       |
| Modelling                          | Giving a child the opportunity to learn from others by eating and drinking with them (e.g. sitting a child with other children or family members at mealtimes)                                                                                                                                                           |
| Training to self-feed              | Teaching a child to feed themselves (e.g. placing a hand over a child's hand to help guide the food into their mouth)                                                                                                                                                                                                    |
| Support for parents                | Help for parents around their child's eating and drinking difficulties (e.g. counselling; parent support groups)                                                                                                                                                                                                         |
| Sharing information                | Any information shared to help parents and professional understand a child's difficulties with eating and drinking (e.g. professionals teaching parents and school staff about a child's physical or sensory difficulties; parents helping professionals understand what's important about mealtimes in their family)    |
| Psychological support for children | Psychological help for a child (e.g. counselling)                                                                                                                                                                                                                                                                        |

**Table 2. Description of outcomes presented in Delphi Survey**

| Outcome                                      | Description                                                                               |
|----------------------------------------------|-------------------------------------------------------------------------------------------|
| General health                               | A child's overall health                                                                  |
| Weight                                       | How much a child weighs                                                                   |
| Height                                       | How tall a child is                                                                       |
| Growth                                       | A change in a child's growth, including height and weight                                 |
| Nutrition                                    | A child's level of energy and nutrients for healthy growth                                |
| Child's enjoyment of mealtimes               |                                                                                           |
| Parent or caregiver's enjoyment of mealtimes |                                                                                           |
| Quality of life of child                     | How satisfied a child feels about their life                                              |
| Quality of life of family                    | How satisfied other family members feel about their (own) lives                           |
| Mental health of parent or caregiver         | A parent / caregiver's mood and emotional wellbeing                                       |
| Safety                                       | A child's ability to eat and drink safely without choking or aspirating                   |
| Oral motor control                           | A child's ability to control the movement of their mouth, jaw, tongue or lips and swallow |
| Efficiency                                   | A child's ability to eat and drink at a reasonable pace                                   |
| Independence                                 | A child's ability to feed themselves                                                      |
| Variety                                      | The range of foods or liquids a child eats or drinks                                      |
| Amount                                       | The amount of food or liquid a child eats or drinks per day                               |
| Appetite                                     | A child's level of hunger and desire for food / drink                                     |
| Mealtime behaviour                           | A child behaving appropriately during meals                                               |
| Mealtime interaction                         | The interaction between a child and the person feeding them at mealtimes                  |
| Social participation                         | A child's overall involvement at mealtimes                                                |
| Child's understanding                        | A child's understanding of mealtime activities and routines                               |
| Parent or caregiver's understanding          | A parent / caregiver's insight into their child's eating and drinking difficulties        |

## Patient and public involvement

The questionnaire and information sheet were developed by the research team, which included parent co-investigators, in consultation with the Parent Advisory Group (PAG) and following focus groups with parents and health professionals [4].

## Procedure

The same questionnaire was sent to parents and health professionals in two rounds. In round one, respondents rated the importance of individual intervention categories, and outcomes. In round two, respondents were shown bar charts of parent and health professionals' ratings from round one and then re-rated the importance of each intervention and outcome. No items were removed between rounds. Both survey rounds were open for three weeks with a week between the rounds for data analysis. Respondents and non-respondents from round one were invited to take part in round two, to maximise participation. Round two respondents entered a prize draw to win one of five £100 vouchers for each stakeholder group.

## Analysis

Consensus was conservatively defined as  $\geq 67\%$  and required each stakeholder group to rate an intervention or outcome as essential (rated 7-9 at round two) [8].

## Stakeholder workshops

### Participants

Parents who took part in the FEEDS national survey [3] and had expressed interest in subsequent research stages were invited to participate. Participants had to be able to travel to North East and South East England for the workshops. Invitations were sent to health professionals linked to regional and national clinical

1  
2  
3 networks. Participants were purposively selected to maximise variation in their  
4 experience of EDSD and service provision.  
5  
6  
7  
8  
9

## 10 Design

11  
12 Two half-day workshops were held (Newcastle upon Tyne and London). The  
13 workshops aimed to facilitate detailed discussion on (1) Which interventions and  
14 outcomes should be evaluated in future research?; (2) A proposed intervention  
15 'toolkit' for EDSD (developed during previous study stages), including: How could the  
16 essential interventions identified in the Delphi survey be presented to parents as a  
17 list of treatment options?; What level of detail would parents need on each  
18 intervention?; How would a menu of treatment options be individualised?; What level  
19 of support would families need from health professionals to use the toolkit?  
20  
21  
22  
23  
24  
25  
26  
27  
28

## 29 Patient and public involvement

30  
31 Parent co-investigators were involved in the design and delivery of the  
32 workshops. The PAG also reviewed workshop materials and commented on the  
33 structure and timings of tasks.  
34  
35  
36  
37  
38  
39

## 40 Procedure

41  
42 Attendees were presented with a study overview including the main findings  
43 from earlier research stages. Individual topics were discussed in small mixed groups  
44 of parents and professionals. One research team member facilitated each group  
45 and notes were taken. The workshops were iterative, with the results of the first  
46 workshop being presented at the second. To thank them for their time and/or cover  
47 travel costs, parents and professionals received a shopping voucher.  
48  
49  
50  
51  
52

53 Notes from the workshop discussions were reviewed by members of the  
54 research team and key themes identified; themes were then discussed by the full  
55 research team. For further details see Parr et al [4].  
56  
57  
58  
59  
60

## RESULTS

### Delphi survey

196 parents and 175 health professionals were invited (see Figure 1). 81 parents (41%) and 61 parents (31%) responded to rounds one and two respectively, with 52 parents responding to both rounds. 76 health professionals (43%) and 61 health professionals (35%) responded to rounds one and two respectively, with 51 health professionals responding to both rounds.

[Insert figure 1 about here]

### Participant Characteristics

The characteristics of respondents are shown in Table 3. Similar proportions of parents and health professionals participated in round one (49% and 51% respectively), and round two (50% and 50% respectively). The characteristics of respondents who completed both rounds and those who completed round two only were very similar. See Supplementary Tables 1 and 2 for full details of respondents and non-respondents.

**Table 3. Characteristics of Delphi Survey respondents for Rounds 1 and 2**

|                     | Round 1<br>N=158         |                      | Round 2<br>N=123         |                      |
|---------------------|--------------------------|----------------------|--------------------------|----------------------|
|                     | Parents<br>N=81<br>n (%) | HPs<br>N=76<br>n (%) | Parents<br>N=61<br>n (%) | HPs<br>N=61<br>n (%) |
| Age <sup>a</sup>    |                          |                      |                          |                      |
| Under 20 years      | 0 (0)                    | 0 (0)                | 0 (0)                    | 0 (0)                |
| 21-30 years         | 2 (3)                    | 8 (11)               | 2 (3)                    | 3 (5)                |
| 31-40 years         | 32 (40)                  | 19 (25)              | 23 (38)                  | 17 (28)              |
| 41-50 years         | 40 (49)                  | 25 (33)              | 32 (53)                  | 20 (33)              |
| 51-60 years         | 7 (9)                    | 22 (29)              | 4 (7)                    | 20 (33)              |
| 61 years and over   | 0 (0)                    | 2 (3)                | 0 (0)                    | 1 (2)                |
| Gender <sup>a</sup> |                          |                      |                          |                      |

|                                             |         |         |         |         |
|---------------------------------------------|---------|---------|---------|---------|
| Female                                      | 76 (94) | 71 (93) | 58 (95) | 58 (95) |
| Male                                        | 5 (6)   | 4 (5)   | 3 (5)   | 3 (5)   |
| Prefer not to say                           | 0 (0)   | 1 (1)   | 0 (0)   | 0 (0)   |
| Location                                    |         |         |         |         |
| England                                     |         |         |         |         |
| North East                                  | 14 (17) | 5 (7)   | 11 (18) | 7 (12)  |
| North West                                  | 8 (10)  | 3 (4)   | 6 (10)  | 3 (5)   |
| Yorkshire and Humber                        | 5 (6)   | 10 (13) | 2 (3)   | 9 (15)  |
| Midlands                                    | 11 (14) | 16 (21) | 9 (14)  | 10 (16) |
| South East including London                 | 27 (33) | 26 (34) | 20 (33) | 21 (34) |
| South West                                  | 8 (10)  | 8 (11)  | 7 (12)  | 4 (7)   |
| Scotland                                    | 3 (4)   | 4 (5)   | 2 (3)   | 5 (8)   |
| Northern Ireland                            | 2 (3)   | 0 (0)   | 2 (3)   | 0 (0)   |
| Wales                                       | 1 (1)   | 4 (5)   | 1 (2)   | 2 (3)   |
| Missing                                     | 2 (3)   | 0 (0)   | 1 (2)   | 0 (0)   |
| Ethnicity <sup>a</sup>                      |         |         |         |         |
| White                                       | 78 (96) | 70 (92) | 59 (97) | 55 (90) |
| Asian / Asian British                       | 2 (3)   | 3 (4)   | 0 (0)   | 4 (7)   |
| Black / African / Caribbean / Black British | 0 (0)   | 0 (0)   | 1 (2)   | 0 (0)   |
| Mixed / Multiple ethnic group               | 1 (1)   | 1 (1)   | 1 (2)   | 1 (2)   |
| Other ethnic group                          | 0 (0)   | 2 (3)   | 0 (0)   | 1 (2)   |
| Prefer not to say                           | 0 (0)   | 0 (0)   | 0 (0)   | 0 (0)   |
| Nature of child's EDSD                      |         |         |         |         |
| Physical EDSD                               | 14 (17) | 14 (18) | 9 (15)  | 13 (21) |
| Nonphysical EDSD                            | 40 (49) | 5 (7)   | 32 (53) | 3 (5)   |
| Mixed EDSD                                  | 27 (33) | 57 (75) | 20 (33) | 45 (74) |
| Missing                                     | 0 (0)   | 0 (0)   | 0 (0)   | 0 (0)   |

<sup>a</sup> No missing data

### Interventions for children with neurodisability and EDSD

Table 4 shows the proportion of parents and health professionals who rated interventions as essential in rounds one and two. Consensus was achieved for 17/25 interventions at round one, increasing to 19/25 interventions at round two. The interventions rated as an essential part of an intervention package for young children with neurodisability and EDSD are shown in Table 4. See Supplementary Tables 3 and 4 for all intervention ratings.

### Table 4. Parents' and health professionals' rating of interventions as essential on Round 1 and 2 of the Delphi Survey

Bold denotes a rating of 'essential' (score 7-9) by  $\geq 67\%$  within the stakeholder group. Shaded cell denotes agreement by both stakeholder groups that the item was 'essential' (score 7-9)  $\geq 67\%$ .

|  | Round 1 | Round 2 |
|--|---------|---------|
|--|---------|---------|

| Intervention                             | Parents     | Health professionals | Parents     | Health professionals |
|------------------------------------------|-------------|----------------------|-------------|----------------------|
|                                          | N = 81<br>% | N = 76<br>%          | N = 61<br>% | N = 61<br>%          |
| Modifying environment                    | <b>67</b>   | <b>87</b>            | <b>77</b>   | <b>95</b>            |
| Positioning                              | <b>92</b>   | <b>97</b>            | <b>96</b>   | <b>100</b>           |
| Modifying equipment                      | <b>76</b>   | <b>87</b>            | <b>93</b>   | <b>90</b>            |
| Scheduling of meals                      | 53          | <b>82</b>            | 50          | <b>83</b>            |
| Modifying consistency of food or drink   | <b>79</b>   | <b>86</b>            | <b>79</b>   | <b>96</b>            |
| Modifying other aspects of food or drink | <b>74</b>   | <b>75</b>            | <b>86</b>   | <b>83</b>            |
| Modifying placement of food              | <b>68</b>   | <b>79</b>            | <b>75</b>   | <b>90</b>            |
| Enhancing communication                  | <b>76</b>   | <b>82</b>            | <b>86</b>   | <b>90</b>            |
| Visual supports                          | 52          | 63                   | 52          | <b>72</b>            |
| Responding to a child's cues for feeding | <b>83</b>   | <b>94</b>            | <b>93</b>   | <b>96</b>            |
| Pace of feeding                          | <b>77</b>   | <b>96</b>            | <b>89</b>   | <b>100</b>           |
| Physical support                         | <b>72</b>   | <b>69</b>            | <b>82</b>   | <b>81</b>            |
| Oral and sensory desensitisation         | <b>72</b>   | <b>68</b>            | <b>82</b>   | <b>75</b>            |
| Oral-motor exercises                     | <b>73</b>   | 40                   | <b>70</b>   | 35                   |
| Graded exposure to new food              | 66          | <b>85</b>            | <b>70</b>   | <b>84</b>            |
| Graded exposure to new textures          | <b>68</b>   | <b>81</b>            | <b>76</b>   | <b>81</b>            |
| Changing behaviour at mealtimes          | 57          | 63                   | 58          | 56                   |
| Modelling                                | <b>80</b>   | <b>82</b>            | <b>77</b>   | <b>83</b>            |
| Training to self-feed                    | <b>68</b>   | 47                   | 55          | 46                   |
| Support for parents                      | <b>81</b>   | <b>84</b>            | <b>95</b>   | <b>96</b>            |
| Psychological support for child          | <b>72</b>   | 63                   | <b>77</b>   | 59                   |
| Medication                               | <b>78</b>   | <b>86</b>            | <b>87</b>   | <b>91</b>            |
| Energy supplements                       | 62          | <b>74</b>            | <b>69</b>   | <b>73</b>            |
| Sharing information                      | <b>90</b>   | <b>95</b>            | <b>100</b>  | <b>97</b>            |
| Vitamin or nutritional supplements       | <b>68</b>   | <b>68</b>            | <b>85</b>   | <b>75</b>            |

### Outcomes for children with neurodisability and EDSD

Table 5 shows the proportions of parents and health professionals who rated outcomes as essential in rounds one and two. The outcomes for which there was consensus on did not change between rounds. 10 outcomes were viewed as essential; some related to physical health, such as safety and growth, and others to

the International Classification of Functioning Disability and Health, such as child social participation. See Supplementary Tables 5 and 6 for all outcome ratings.

**Table 5. Parents' and health professionals' agreement on outcomes rated as essential on Round 1 and Round 2 of the Delphi Survey**

Bold denotes a rating of 'essential' (score 7-9) by  $\geq 67\%$  within the stakeholder group. Shaded cell denotes agreement by both stakeholder groups that the item was 'essential' (score 7-9)  $\geq 67\%$ .

| Outcome                                | Round 1           |                                 | Round 2         |                                 |
|----------------------------------------|-------------------|---------------------------------|-----------------|---------------------------------|
|                                        | Parents<br>N = 81 | Health<br>professionals<br>N=76 | Parents<br>N=61 | Health<br>professionals<br>N=61 |
| Nutrition                              | <b>89</b>         | <b>97</b>                       | <b>95</b>       | <b>98</b>                       |
| General Health                         | <b>89</b>         | <b>93</b>                       | <b>97</b>       | <b>98</b>                       |
| Weight                                 | 53                | 51                              | 34              | 48                              |
| Height                                 | 31                | 32                              | 12              | 12                              |
| Growth                                 | <b>75</b>         | <b>76</b>                       | <b>82</b>       | <b>89</b>                       |
| Child's enjoyment of mealtimes         | <b>83</b>         | <b>91</b>                       | <b>90</b>       | <b>98</b>                       |
| Parent's enjoyment of mealtimes        | 42                | <b>76</b>                       | 39              | <b>78</b>                       |
| Quality of life of child               | <b>95</b>         | <b>92</b>                       | <b>98</b>       | <b>100</b>                      |
| Quality of life of family              | <b>78</b>         | <b>87</b>                       | <b>90</b>       | <b>97</b>                       |
| Mental health of parent                | <b>83</b>         | <b>84</b>                       | <b>93</b>       | <b>97</b>                       |
| Safety                                 | <b>97</b>         | <b>97</b>                       | <b>100</b>      | <b>100</b>                      |
| Oral-motor control                     | <b>87</b>         | <b>74</b>                       | <b>86</b>       | <b>72</b>                       |
| Efficiency                             | 44                | 60                              | 17              | 46                              |
| Independence                           | 60                | 31                              | 43              | 28                              |
| Variety                                | 51                | 23                              | 26              | 12                              |
| Amount                                 | 62                | 40                              | 53              | 25                              |
| Appetite                               | 59                | 44                              | 46              | 38                              |
| Mealtime behaviour                     | 41                | 30                              | 34              | 26                              |
| Mealtime Interaction                   | 61                | <b>81</b>                       | 65              | <b>79</b>                       |
| Social participation                   | 50                | <b>77</b>                       | 53              | <b>74</b>                       |
| Parent's understanding of child's EDSD | <b>89</b>         | <b>89</b>                       | <b>95</b>       | <b>93</b>                       |
| Child's understanding of mealtimes     | 51                | 51                              | 58              | 40                              |

### Stakeholder Workshops

15 parents and 19 health professionals took part in the workshops.



## Participant Characteristics

Nine parents had children with physical EDSD, two had children with non-physical EDSD, two had children with mixed EDSD, and two had one child with physical EDSD and one child with non-physical EDSD. Health professionals comprised six speech and language therapists, four dietitians, four paediatricians, three occupational therapists, two clinical psychologists, a physiotherapist, and a nurse.

## Interventions and outcomes for evaluation in future research

Parents and health professionals agreed that no single intervention was suitable for all children with EDSD as many children require a number of interventions concurrently or sequentially. Both parents and health professionals endorsed the idea of an intervention 'toolkit' that could be used together to identify the most appropriate interventions for individual children and their families. They thought the toolkit should be visually represented and be available as a digital and hard copy with interactive properties to support communication between parents and professionals. They emphasised the need for flexibility in the toolkit to allow families and health professionals to select the most appropriate interventions, at the right time. Some parents thought they would want to be able to see the whole toolkit, to facilitate a central parental role in intervention prioritisation. Parents and health professionals thought that detailed information was needed for each intervention to fully inform families and allow them to share in decision-making.

Participants thought a lead health professional (such as a speech and language therapist) and multidisciplinary team should support families in their toolkit use. The nature of support needed would vary between families and may include psychological input. Parents and health professionals raised a number of practical issues about toolkit use, including: how to deliver the toolkit to meet the needs of a heterogeneous population with diverse EDSD; how to deliver the toolkit where multidisciplinary EDSD team professionals are unavailable or under-resourced; and how to deliver the toolkit to children with non-physical EDSD who may not currently receive multidisciplinary team healthcare.

## Toolkit of interventions for children with neurodisability and EDS

Using the findings from the Delphi survey and workshops, alongside findings from other stages of the FEEDS research programme [4], we developed the FEEDS Toolkit of interventions for use by health professionals and parents to support children with neurodisability and EDS (see Figure 2). The FEEDS Toolkit comprises 19 EDS interventions: 15 for use with children with all types of EDS, two for use with children with physical or mixed EDS only and two that are rarely offered by the UK NHS (oral motor exercises and psychological support for the child). The FEEDS Toolkit also includes ongoing interventions that influence EDS strategies such as individual context, medical issues and sharing information.

[Insert figure 2 about here]

## DISCUSSION

The Delphi survey established consensus on the 19 essential interventions to include in the FEEDS Toolkit, and 10 outcomes of importance. The stakeholder workshops showed support from parents and health professionals for the FEEDS Toolkit that could be worked through by health professionals and parents. Rather than evaluating single standalone interventions, we suggest that future research should evaluate a combination of interventions within the FEEDS Toolkit.

The large number and diversity of interventions identified as essential for inclusion in the toolkit reflects the heterogeneity of children with neurodisability and EDS, and their families. Beresford et al [10] found health professionals working with children with neurodisability had a “great big menu of interventions to choose from” which were highly individualised. Health professionals talked about taking an eclectic approach and using a range of interventions from their toolbox with children with neurodisability and their families; key factors affecting decision making regarding appropriate interventions included child and family’s characteristics and resources [10]. McAnuff et al [11] described a prototype for an interactive toolkit to

1  
2  
3 support families and health professionals to identify opportunities for change, and to  
4 jointly select appropriate interventions. This is in keeping with views regarding how  
5 the FEEDS toolkit might be operationalised.  
6  
7

8  
9

## 10 11 **Strengths and limitations**

12  
13 We acknowledge the potential risks of sampling and response bias.  
14 Participants from the FEEDS national survey were recruited from wide ranging  
15 sources [4]; their data allowed comparison of the characteristics of Delphi survey  
16 respondents and non-respondents. The overall response ( $\approx 40\%$ ) was acceptable.  
17 There was minimal difference between the characteristics of respondents between  
18 rounds one and two. Through contacting non-respondents from round one in round  
19 two we increased round two responses thereby improving precision. We used a  
20 conservative consensus definition of  $\geq 67\%$ ; our findings may have differed if we had  
21 used different consensus definitions.  
22  
23  
24  
25  
26  
27  
28

29  
30 The workshops had representation from two diverse geographical areas and  
31 parents and professionals with a broad range of EDSD experiences. The iterative  
32 nature of the workshops facilitated detailed discussions. Young people with EDSD  
33 were not invited to the workshops; however, at separate young people's focus  
34 groups, they agreed the importance of the outcomes identified [4].  
35  
36  
37  
38  
39  
40  
41

## 42 **Conclusions**

43  
44 The FEEDS Delphi survey and workshops identified the interventions  
45 essential to consider for improving EDSD in children with neurodisability. They also  
46 identified the most important outcomes to measure, focusing on both the child and  
47 the wider family. These findings, alongside findings from earlier stages of the  
48 FEEDS research programme [4] have been used to develop a toolkit of  
49 interventions. The FEEDS Toolkit requires evaluation of its feasibility and  
50 acceptability, and its effectiveness for improving outcomes for children and families.  
51  
52  
53  
54  
55  
56  
57  
58  
59  
60

Contributors: JP was Chief Investigator, co-led the design and delivery of the study, supervised the Delphi survey data analysis, co-led the consultation workshops and analysed the data. LP co-led the design and delivery of the project, co-led the consultation workshops and analysed the data. HT developed the Delphi survey materials, ran the Delphi survey and analysed the data, and co-led the consultation workshops. CM, JC, DS, JS, DG, JT and EM contributed to the design of the Delphi survey. CB, AC, DG, CM, HM, JS, JT, JC and DS co-facilitated the consultation workshops. All authors contributed to the study design, interpretation of results, writing of the manuscript, and reviewed and approved the final version.

Acknowledgements: We are grateful to all the participants who gave their time to complete the Delphi survey and workshops. The Sponsor for the studies was Newcastle upon Tyne Hospitals NHS Foundation Trust.

Funding: This study was funded by the National Institute of Health Research (NIHR) Health Technology Assessment Programme (ref: 15/156/02). The views expressed are those of the author(s) and not necessarily those of the NIHR or the Department of Health and Social Care.

The NIHR HTA report from the research (including that reported in this manuscript) can be found at: <https://www.journalslibrary.nihr.ac.uk/hta/hta25220/#/full-report>

Competing interests: Diane Sellers received a research grant from Nutricia Advanced Medical Nutrition UK (Wiltshire, UK) from 2017 to 2018, honorarium payments from Nutricia Advanced Medical Nutrition UK from 2015 to 2019 and an honorarium payment from Nutricia Advanced Medical Nutrition UK in 2018. Morag Andrew received fees from Nutricia Advanced Medical Nutrition UK to attend a conference in which she was presenting industry partner research work and lecture fees/symposium presentation fees from Nutricia Advanced Medical Nutrition UK and Nestlé SA (Vevey, Switzerland). Jill Cadwgan reports personal fees from Novartis Pharmaceuticals (Basel, Switzerland) and Allergan, and Ispen Pharmaceuticals (Paris, France).

1  
2  
3  
4  
5 Patient consent for publication: Not required  
6  
7  
8

9  
10 Ethics approval: This study was approved by The West Midlands and the Black  
11 Country Research Ethics Committee (17/WM/0439). Completion of the Delphi  
12 survey was taken as informed consent and informed consent was taken at the start  
13 of the stakeholder workshops.  
14  
15  
16  
17

18  
19 Data availability statement: Data that support the findings of this study are available  
20 on request from the corresponding author [JP].  
21  
22  
23  
24  
25  
26  
27  
28  
29  
30  
31  
32  
33  
34  
35  
36  
37  
38  
39  
40  
41  
42  
43  
44  
45  
46  
47  
48  
49  
50  
51  
52  
53  
54  
55  
56  
57  
58  
59  
60

## References

- 1 Morris C, Janssens A, Tomlinson R, et al. Towards a definition of neurodisability: a Delphi survey. *Dev Med Child Neurol* 2013;55:1103-8.
- 2 Sullivan PB, Andersen GL, Andrew MJ, editors. *Nutrition in neurodisability*. London: Mac Keith Press, 2019.
- 3 Taylor H, Pennington L, Craig D, et al. Children with neurodisability and feeding difficulties: a UK survey of parent-delivered interventions. *BMJ Paediatrics Open* 2021;5:e001095.
- 4 Parr J, Pennington L, Taylor H, et al. Parent-delivered interventions used at home to improve eating, drinking and swallowing in children with neurodisability: the FEEDS mixed-methods study. *Health Technol Assess* 2021;25:1-208.
- 5 Marshall J, Ware R, Ziviani J, et al. Efficacy of interventions to improve feeding difficulties in children with autism spectrum disorders: a systematic review and meta-analysis. *Child Care Health Dev* 2015;41:278-302.
- 6 Morgan AT, Dodrill P, Ward EC. Interventions for oropharyngeal dysphagia in children with neurological impairment. *Cochrane Database Syst Rev* 2012;10:CD009456.
- 7 NICE. *Cerebral palsy in under 25s: assessment and management*. NICE guideline [NG62]. London: National Institute of Health and Care Excellence, 2017.
- 8 Sinha IP, Smyth RL, Williamson PR. Using the Delphi technique to determine which outcomes to measure in clinical trials: recommendations for the future based on a systematic review of existing studies. *PLoS medicine* 2011;8:e1000393.
- 9 Qualtrics. *Qualtrics*. Utah, USA: Provo, 2005.
- 10 Beresford B, Clarke S, Maddison J. Therapy interventions for children with neurodisabilities: a qualitative scoping study. *Health Technol Assess* 2018;22:1-150.
- 11 McAnuff J, Brooks R, Duff C, et al. Improving participation outcomes and interventions in neurodisability: co-designing future research. *Child Care Health Dev* 2017;43:298-306.

Figure 1. Flow diagram of Delphi Survey recruitment

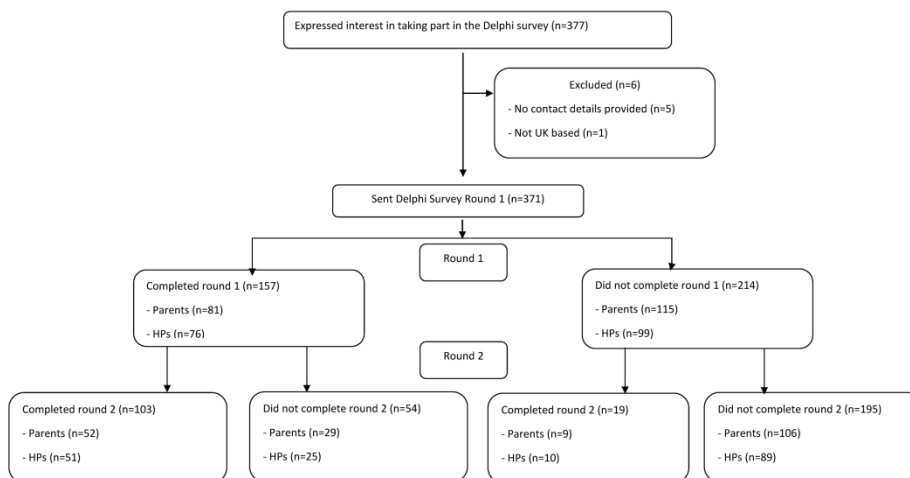

296x209mm (300 x 300 DPI)

1  
2  
3  
4  
5  
6  
7  
8  
9  
10  
11  
12  
13  
14  
15  
16  
17  
18  
19  
20  
21  
22  
23  
24  
25  
26  
27  
28  
29  
30  
31  
32  
33  
34  
35  
36  
37  
38  
39  
40  
41  
42  
43  
44  
45  
46  
47  
48  
49  
50  
51  
52  
53  
54  
55  
56  
57  
58  
59  
60

Figure 2. Outline of FEEDS Toolkit of Interventions

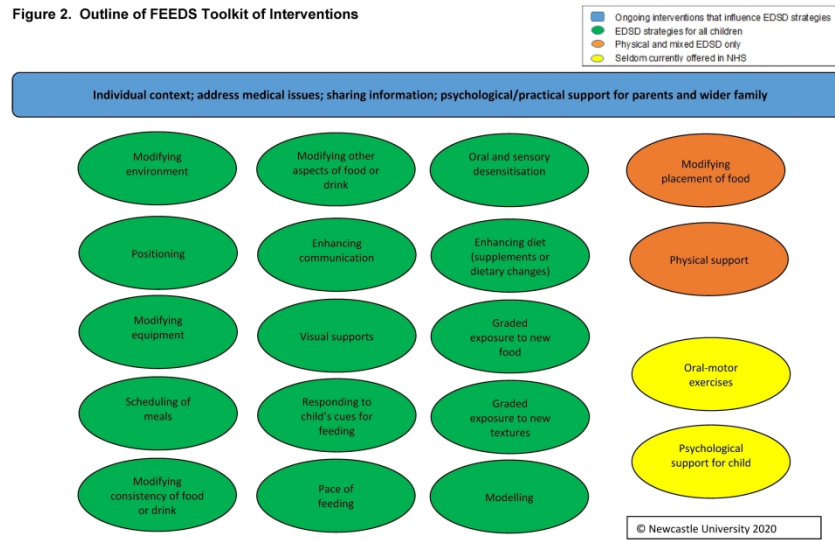

296x209mm (300 x 300 DPI)



**Supplementary Table 1. Characteristics of respondents who completed both rounds of Delphi Survey and those who only completed Round 2**

|                                                | Round 1<br>and 2<br>N=103 | Round 2<br>only<br>N=19 |
|------------------------------------------------|---------------------------|-------------------------|
| <b>Role</b>                                    |                           |                         |
| Parent                                         | 52 (51) <sup>c</sup>      | 9 (47)                  |
| Health Professional                            | 51 (50) <sup>c</sup>      | 10 (53)                 |
| <b>Age</b>                                     |                           |                         |
| Under 20 years                                 | 0 (0)                     | 0 (0)                   |
| 21-30 years                                    | 5 (5)                     | 0 (0)                   |
| 31-40 years                                    | 28 (27)                   | 12 (63)                 |
| 41-50 years                                    | 47 (46)                   | 5 (26)                  |
| 51-60 years                                    | 22 (21)                   | 2 (11)                  |
| 61-70 years                                    | 0 (0)                     | 0 (0)                   |
| Over 70 years                                  | 1 (1)                     | 0 (0)                   |
| Missing                                        | 0 (0)                     | 0 (0)                   |
| <b>Gender</b>                                  |                           |                         |
| Female                                         | 98 (95)                   | 18 (95)                 |
| Male                                           | 5 (5)                     | 1 (5)                   |
| Prefer not to say                              | 0 (0)                     | 0 (0)                   |
| Missing                                        | 0 (0)                     | 0 (0)                   |
| <b>Location</b>                                |                           |                         |
| England                                        |                           |                         |
| North East                                     | 15 (15)                   | 3 (16)                  |
| North West                                     | 8 (8)                     | 1 (5)                   |
| Yorkshire and Humber                           | 9 (9)                     | 2 (11)                  |
| Midlands                                       | 15 (15)                   | 4 (21)                  |
| South East including                           | 35 (34)                   | 6 (32)                  |
| London                                         |                           |                         |
| South West England                             | 10 (10)                   | 1 (5)                   |
| Scotland                                       | 5 (5)                     | 2 (11)                  |
| Northern Ireland                               | 2 (2)                     | 0 (0)                   |
| Wales                                          | 3 (3)                     | 0 (0)                   |
| Missing                                        | 1 (1)                     | 0 (0)                   |
| <b>Ethnicity</b>                               |                           |                         |
| White                                          | 98 (95)                   | 16 (84)                 |
| Black / African / Caribbean /<br>Black British | 0 (0)                     | 1 (5)                   |
| Asian / Asian British                          | 3 (3)                     | 1 (5)                   |
| Mixed / Multiple ethnic group                  | 2 (2)                     | 0 (0)                   |
| Other ethnic group                             | 0 (0)                     | 1 (5)                   |
| Prefer not to say                              | 0 (0)                     | 0 (0)                   |
| Missing                                        | 0 (0)                     | 0 (0)                   |
| <b>Type of EDSD of child<sup>a</sup></b>       |                           |                         |
| Physical EDSD                                  | 21 (20)                   | 1 (5)                   |
| Non-physical EDSD                              | 28 (27)                   | 7 (37)                  |
| Mixed EDSD <sup>b</sup>                        | 54 (52)                   | 11 (58)                 |
| Missing                                        | 0 (0)                     | 0 (0)                   |

<sup>a</sup> EDSD refers to eating, drinking and swallowing difficulties. <sup>b</sup> Mixed EDSD refers to children with physical and non-physical causes to their EDSD. <sup>c</sup> Percentages add up to more than 100% as a result of rounding the number to the nearest whole number.

## Supplementary Table 2. Characteristics of non-respondents to the Delphi Survey

|                                                | Non-respondents<br>N=195  |                       |
|------------------------------------------------|---------------------------|-----------------------|
|                                                | Parents<br>N=269<br>n (%) | HPs<br>N=335<br>n (%) |
| Age (no missing data)                          |                           |                       |
| Under 20 years                                 | 5 (2)                     | - <sup>a</sup>        |
| 21-30 years                                    | 23 (9)                    | - <sup>a</sup>        |
| 31-40 years                                    | 130 (48)                  | - <sup>a</sup>        |
| 41-50 years                                    | 95 (35)                   | - <sup>a</sup>        |
| 51-60 years                                    | 14 (5)                    | - <sup>a</sup>        |
| 61 years and over                              | 2 (1)                     | - <sup>a</sup>        |
| Gender (no missing data)                       |                           |                       |
| Female                                         | 254 (94)                  | - <sup>a</sup>        |
| Male                                           | 15 (6)                    | - <sup>a</sup>        |
| Prefer not to say                              | 0 (0)                     | - <sup>a</sup>        |
| Location                                       |                           |                       |
| England                                        |                           |                       |
| North East                                     | 48 (18)                   | 29 (9)                |
| North West                                     | 20 (7)                    | 22 (7)                |
| Yorkshire and Humber                           | 28 (10)                   | 49 (15)               |
| Midlands                                       | 66 (25)                   | 47 (14)               |
| South East including London                    | 56 (21)                   | 136 (41)              |
| South West                                     | 29 (11)                   | 14 (4)                |
| Scotland                                       | 11 (4)                    | 14 (4)                |
| Northern Ireland                               | 4 (2)                     | 11 (3)                |
| Wales                                          | 7 (3)                     | 13 (4)                |
| Missing                                        | 0 (0)                     | 0 (0)                 |
| Ethnicity (no missing data)                    |                           |                       |
| White                                          | 234 (87)                  | - <sup>a</sup>        |
| Asian / Asian British                          | 22 (8)                    | - <sup>a</sup>        |
| Black / African / Caribbean /<br>Black British | 4 (2)                     | - <sup>a</sup>        |
| Mixed / Multiple ethnic group                  | 7 (3)                     | - <sup>a</sup>        |
| Other ethnic group                             | 0 (0)                     | - <sup>a</sup>        |
| Prefer not to say                              | 2 (1)                     | - <sup>a</sup>        |
| Nature of child's EDSD                         |                           |                       |
| Physical EDSD                                  | 58 (22)                   | 63 (19)               |
| Nonphysical EDSD                               | 141 (52)                  | 23 (7)                |
| Mixed EDSD                                     | 59 (22)                   | 248 (74)              |
| Missing                                        | 11 (4)                    | 0 (0)                 |

<sup>a</sup> Data not collected in national survey.

**Supplementary Table 3. Parents' and health professionals' ratings of interventions on Round 1 of the Delphi Survey**

|                                          | n  | Not Important<br>(score of 0-3)<br>% | Important but<br>not essential<br>(score of 4-6)<br>% | Essential<br>(score of 7-9)<br>% | n  | Not important<br>(score of 0-3)<br>% | Important but<br>not essential<br>(score of 4-6)<br>% | Essential<br>(score of 7-9)<br>% |
|------------------------------------------|----|--------------------------------------|-------------------------------------------------------|----------------------------------|----|--------------------------------------|-------------------------------------------------------|----------------------------------|
| Modifying environment                    | 78 | 3                                    | 31                                                    | <b>67</b>                        | 74 | 0                                    | 14                                                    | <b>87</b>                        |
| Positioning                              | 72 | 1                                    | 7                                                     | <b>92</b>                        | 74 | 0                                    | 3                                                     | <b>97</b>                        |
| Modifying equipment                      | 75 | 7                                    | 17                                                    | <b>76</b>                        | 74 | 0                                    | 14                                                    | <b>87</b>                        |
| Scheduling of meals                      | 79 | 13                                   | 34                                                    | 53                               | 74 | 0                                    | 18                                                    | <b>82</b>                        |
| Modifying consistency of food or drink   | 70 | 9                                    | 13                                                    | <b>79</b>                        | 72 | 1                                    | 13                                                    | <b>86</b>                        |
| Modifying other aspects of food or drink | 76 | 5                                    | 21                                                    | <b>74</b>                        | 73 | 3                                    | 22                                                    | <b>75</b>                        |
| Modifying placement of food              | 60 | 10                                   | 22                                                    | <b>68</b>                        | 70 | 3                                    | 19                                                    | <b>79</b>                        |
| Enhancing communication                  | 75 | 4                                    | 20                                                    | <b>76</b>                        | 73 | 0                                    | 18                                                    | <b>82</b>                        |
| Visual supports                          | 71 | 11                                   | 37                                                    | 52                               | 71 | 0                                    | 37                                                    | 63                               |
| Responding to a child's cues             | 64 | 5                                    | 13                                                    | <b>83</b>                        | 71 | 1                                    | 4                                                     | <b>94</b>                        |
| Pace of feeding                          | 70 | 1                                    | 21                                                    | <b>77</b>                        | 71 | 0                                    | 4                                                     | <b>96</b>                        |
| Physical supports                        | 54 | 13                                   | 15                                                    | <b>72</b>                        | 67 | 3                                    | 28                                                    | <b>69</b>                        |
| Medication                               | 49 | 8                                    | 14                                                    | <b>78</b>                        | 70 | 0                                    | 14                                                    | <b>86</b>                        |
| Energy supplements                       | 45 | 13                                   | 24                                                    | 62                               | 68 | 0                                    | 27                                                    | <b>74</b>                        |
| Vitamin or nutritional supplements       | 60 | 7                                    | 25                                                    | <b>68</b>                        | 68 | 0                                    | 32                                                    | <b>68</b>                        |
| Oral and sensory desensitisation         | 68 | 6                                    | 20                                                    | <b>72</b>                        | 72 | 10                                   | 22                                                    | <b>68</b>                        |
| Oral-motor exercises                     | 59 | 7                                    | 20                                                    | <b>73</b>                        | 68 | 27                                   | 34                                                    | 40                               |
| Graded exposure to new food              | 73 | 6                                    | 29                                                    | 66                               | 72 | 0                                    | 15                                                    | <b>85</b>                        |
| Graded exposure to new textures          | 75 | 3                                    | 29                                                    | <b>68</b>                        | 73 | 0                                    | 19                                                    | <b>81</b>                        |
| Changing behaviour at mealtimes          | 76 | 7                                    | 37                                                    | 57                               | 73 | 4                                    | 33                                                    | 63                               |
| Modelling                                | 79 | 3                                    | 18                                                    | <b>80</b>                        | 73 | 0                                    | 18                                                    | <b>82</b>                        |
| Training to self-feed                    | 69 | 6                                    | 26                                                    | <b>68</b>                        | 72 | 4                                    | 49                                                    | 47                               |
| Support for parents                      | 74 | 3                                    | 16                                                    | <b>81</b>                        | 73 | 0                                    | 16                                                    | <b>84</b>                        |
| Sharing information                      | 76 | 0                                    | 11                                                    | <b>90</b>                        | 73 | 0                                    | 6                                                     | <b>95</b>                        |
| Psychological support for child          | 65 | 9                                    | 19                                                    | <b>72</b>                        | 70 | 3                                    | 34                                                    | 63                               |

The above figures are for those respondents who were able to score individual interventions (i.e. those who had used them) and therefore do not include those who reported being unable to score or for whom data was missing. Percentages were rounded to the nearest whole number and therefore rounded totals are occasionally different to 100%. Scores above the consensus rating of  $\geq 67\%$  are shown in bold.

**Supplementary Table 4. Parents' and health professionals' ratings of interventions on Round 2 of the Delphi Survey**

| Intervention                             | Parents<br>N=61 |                                      |                                                       | Health professionals<br>N=61     |    |                                      |                                                       |                                  |
|------------------------------------------|-----------------|--------------------------------------|-------------------------------------------------------|----------------------------------|----|--------------------------------------|-------------------------------------------------------|----------------------------------|
|                                          | n               | Not Important<br>(score of 0-3)<br>% | Important but<br>not essential<br>(score of 4-6)<br>% | Essential<br>(score of 7-9)<br>% | n  | Not important<br>(score of 0-3)<br>% | Important but<br>not essential<br>(score of 4-6)<br>% | Essential<br>(score of 7-9)<br>% |
| Modifying environment                    | 60              | 2                                    | 22                                                    | <b>77</b>                        | 57 | 0                                    | 5                                                     | <b>95</b>                        |
| Positioning                              | 54              | 2                                    | 2                                                     | <b>96</b>                        | 57 | 0                                    | 0                                                     | <b>100</b>                       |
| Modifying equipment                      | 54              | 4                                    | 4                                                     | <b>93</b>                        | 57 | 0                                    | 11                                                    | <b>90</b>                        |
| Scheduling of meals                      | 58              | 5                                    | 45                                                    | 50                               | 57 | 0                                    | 18                                                    | <b>83</b>                        |
| Modifying consistency of food or drink   | 56              | 2                                    | 20                                                    | <b>79</b>                        | 54 | 0                                    | 4                                                     | <b>96</b>                        |
| Modifying other aspects of food or drink | 59              | 3                                    | 10                                                    | <b>86</b>                        | 57 | 2                                    | 16                                                    | <b>83</b>                        |
| Modifying placement of food              | 48              | 2                                    | 23                                                    | <b>75</b>                        | 57 | 0                                    | 11                                                    | <b>90</b>                        |
| Enhancing communication                  | 59              | 2                                    | 12                                                    | <b>86</b>                        | 57 | 0                                    | 11                                                    | <b>90</b>                        |
| Visual supports                          | 54              | 4                                    | 44                                                    | 52                               | 57 | 2                                    | 26                                                    | <b>72</b>                        |
| Responding to a child's cues             | 55              | 0                                    | 7                                                     | <b>93</b>                        | 56 | 0                                    | 4                                                     | <b>96</b>                        |
| Pace of feeding                          | 56              | 0                                    | 11                                                    | <b>89</b>                        | 56 | 0                                    | 0                                                     | <b>100</b>                       |
| Physical supports                        | 44              | 5                                    | 14                                                    | <b>82</b>                        | 57 | 4                                    | 16                                                    | <b>81</b>                        |
| Medication                               | 47              | 4                                    | 9                                                     | <b>87</b>                        | 57 | 2                                    | 7                                                     | <b>91</b>                        |
| Energy supplements                       | 42              | 2                                    | 29                                                    | <b>69</b>                        | 55 | 0                                    | 27                                                    | <b>73</b>                        |
| Vitamin or nutritional supplements       | 54              | 0                                    | 15                                                    | <b>85</b>                        | 55 | 0                                    | 26                                                    | <b>75</b>                        |
| Oral and sensory desensitisation         | 54              | 6                                    | 13                                                    | <b>82</b>                        | 57 | 9                                    | 16                                                    | <b>75</b>                        |
| Oral-motor exercises                     | 50              | 4                                    | 26                                                    | <b>70</b>                        | 57 | 35                                   | 30                                                    | 35                               |
| Graded exposure to new food              | 60              | 3                                    | 27                                                    | <b>70</b>                        | 57 | 4                                    | 12                                                    | <b>84</b>                        |
| Graded exposure to new textures          | 59              | 2                                    | 2                                                     | <b>76</b>                        | 57 | 0                                    | 19                                                    | <b>81</b>                        |
| Changing behaviour at mealtimes          | 59              | 7                                    | 36                                                    | 58                               | 57 | 2                                    | 42                                                    | 56                               |
| Modelling                                | 60              | 2                                    | 22                                                    | <b>77</b>                        | 57 | 0                                    | 18                                                    | <b>83</b>                        |
| Training to self-feed                    | 56              | 5                                    | 39                                                    | 55                               | 56 | 4                                    | 50                                                    | 46                               |
| Support for parents                      | 60              | 2                                    | 3                                                     | <b>95</b>                        | 56 | 0                                    | 4                                                     | <b>96</b>                        |
| Sharing information                      | 60              | 0                                    | 0                                                     | <b>100</b>                       | 57 | 0                                    | 4                                                     | <b>97</b>                        |
| Psychological support for child          | 52              | 4                                    | 19                                                    | <b>77</b>                        | 56 | 4                                    | 38                                                    | 59                               |

The above figures are for those respondents who were able to score individual interventions (i.e. those who had used them) and therefore do not include those who reported being unable to score or for whom data was missing. Percentages were rounded to the nearest whole number and therefore rounded totals are occasionally different to 100%. Scores above the consensus rating of  $\geq 67\%$  are shown in bold.

**Supplementary Table 5. Parents' and health professionals' ratings of outcomes on Round 1 of the Delphi Survey**

|                                        | Parents<br>N=81 |                                      |                                                       |                                  | Health professionals<br>N=76 |                                      |                                                       |                                  |
|----------------------------------------|-----------------|--------------------------------------|-------------------------------------------------------|----------------------------------|------------------------------|--------------------------------------|-------------------------------------------------------|----------------------------------|
|                                        | n               | Not Important<br>(score of 0-3)<br>% | Important but<br>not essential<br>(score of 4-6)<br>% | Essential<br>(score of 7-9)<br>% | n                            | Not important<br>(score of 0-3)<br>% | Important but<br>not essential<br>(score of 4-6)<br>% | Essential<br>(score of 7-9)<br>% |
| General Health                         | 80              | 1                                    | 10                                                    | <b>89</b>                        | 76                           | 0                                    | 7                                                     | <b>93</b>                        |
| Weight                                 | 80              | 6                                    | 41                                                    | 53                               | 76                           | 4                                    | 45                                                    | 51                               |
| Height                                 | 78              | 18                                   | 51                                                    | 31                               | 76                           | 18                                   | 50                                                    | 32                               |
| Growth                                 | 79              | 0                                    | 25                                                    | <b>75</b>                        | 76                           | 0                                    | 24                                                    | <b>76</b>                        |
| Nutrition                              | 81              | 0                                    | 11                                                    | <b>89</b>                        | 76                           | 0                                    | 3                                                     | <b>97</b>                        |
| Child's enjoyment of mealtimes         | 80              | 1                                    | 16                                                    | <b>83</b>                        | 76                           | 0                                    | 9                                                     | <b>91</b>                        |
| Parent's enjoyment of mealtimes        | 81              | 7                                    | 51                                                    | 42                               | 76                           | 0                                    | 24                                                    | <b>76</b>                        |
| Quality of life of child               | 81              | 1                                    | 4                                                     | <b>95</b>                        | 75                           | 0                                    | 8                                                     | <b>92</b>                        |
| Quality of life of family              | 81              | 1                                    | 21                                                    | <b>78</b>                        | 75                           | 0                                    | 13                                                    | <b>87</b>                        |
| Mental health of parent                | 81              | 0                                    | 17                                                    | <b>83</b>                        | 76                           | 0                                    | 16                                                    | <b>84</b>                        |
| Safety                                 | 78              | 0                                    | 3                                                     | <b>97</b>                        | 75                           | 0                                    | 3                                                     | <b>97</b>                        |
| Oral-motor control                     | 76              | 0                                    | 13                                                    | <b>87</b>                        | 74                           | 3                                    | 23                                                    | <b>74</b>                        |
| Efficiency                             | 80              | 13                                   | 44                                                    | 44                               | 75                           | 5                                    | 35                                                    | 60                               |
| Independence                           | 80              | 13                                   | 28                                                    | 60                               | 75                           | 3                                    | <b>67</b>                                             | 31                               |
| Variety                                | 81              | 5                                    | 44                                                    | 51                               | 75                           | 4                                    | <b>73</b>                                             | 23                               |
| Amount                                 | 81              | 4                                    | 35                                                    | 62                               | 75                           | 5                                    | 55                                                    | 40                               |
| Appetite                               | 81              | 3                                    | 38                                                    | 59                               | 75                           | 3                                    | 53                                                    | 44                               |
| Mealtime behaviour                     | 80              | 14                                   | 45                                                    | 41                               | 74                           | 10                                   | 61                                                    | 30                               |
| Mealtime Interaction                   | 79              | 4                                    | 35                                                    | 61                               | 74                           | 1                                    | 18                                                    | <b>81</b>                        |
| Social participation                   | 80              | 4                                    | 46                                                    | 50                               | 74                           | 1                                    | 22                                                    | <b>77</b>                        |
| Child's understanding of mealtimes     | 80              | 4                                    | 45                                                    | 51                               | 74                           | 4                                    | 45                                                    | 51                               |
| Parent's understanding of child's EDSD | 80              | 1                                    | 10                                                    | <b>89</b>                        | 72                           | 1                                    | 10                                                    | <b>89</b>                        |

The above figures are for those respondents who were able to score individual interventions (i.e. those who had used them) and therefore do not include those who reported being unable to score or for whom data was missing. Percentages were rounded to the nearest whole number and therefore rounded totals are occasionally different to 100%. Scores above the consensus rating of  $\geq 67\%$  are shown in bold.

**Supplementary Table 6. Parents' and health professionals' ratings of outcomes on Round 2 of the Delphi Survey**

| Outcome                                | Parents<br>N=61 |                                      |                                                       |                                  | Health professionals<br>N=61 |                                      |                                                       |                                  |
|----------------------------------------|-----------------|--------------------------------------|-------------------------------------------------------|----------------------------------|------------------------------|--------------------------------------|-------------------------------------------------------|----------------------------------|
|                                        | n               | Not Important<br>(score of 0-3)<br>% | Important but<br>not essential<br>(score of 4-6)<br>% | Essential<br>(score of 7-9)<br>% | n                            | Not important<br>(score of 0-3)<br>% | Important but<br>not essential<br>(score of 4-6)<br>% | Essential<br>(score of 7-9)<br>% |
| General Health                         | 61              | 0                                    | 3                                                     | <b>97</b>                        | 61                           | 0                                    | 2                                                     | <b>98</b>                        |
| Weight                                 | 61              | 0                                    | 66                                                    | 34                               | 61                           | 0                                    | 53                                                    | 48                               |
| Height                                 | 61              | 13                                   | <b>75</b>                                             | 12                               | 61                           | 13                                   | <b>75</b>                                             | 12                               |
| Growth                                 | 61              | 0                                    | 18                                                    | <b>82</b>                        | 61                           | 0                                    | 12                                                    | <b>89</b>                        |
| Nutrition                              | 61              | 0                                    | 5                                                     | <b>95</b>                        | 60                           | 0                                    | 2                                                     | <b>98</b>                        |
| Child's enjoyment of mealtimes         | 61              | 0                                    | 10                                                    | <b>90</b>                        | 60                           | 0                                    | 2                                                     | <b>98</b>                        |
| Parent's enjoyment of mealtimes        | 61              | 8                                    | 53                                                    | 39                               | 59                           | 0                                    | 22                                                    | <b>78</b>                        |
| Quality of life of child               | 61              | 0                                    | 2                                                     | <b>98</b>                        | 59                           | 0                                    | 0                                                     | <b>100</b>                       |
| Quality of life of family              | 61              | 0                                    | 10                                                    | <b>90</b>                        | 58                           | 0                                    | 3                                                     | <b>97</b>                        |
| Mental health of parent                | 61              | 0                                    | 7                                                     | <b>93</b>                        | 58                           | 0                                    | 3                                                     | <b>97</b>                        |
| Safety                                 | 61              | 0                                    | 0                                                     | <b>100</b>                       | 58                           | 0                                    | 0                                                     | <b>100</b>                       |
| Oral-motor control                     | 56              | 0                                    | 14                                                    | <b>86</b>                        | 58                           | 0                                    | 28                                                    | <b>72</b>                        |
| Efficiency                             | 60              | 13                                   | <b>70</b>                                             | 17                               | 57                           | 5                                    | 49                                                    | 46                               |
| Independence                           | 61              | 10                                   | 48                                                    | 43                               | 58                           | 3                                    | <b>69</b>                                             | 28                               |
| Variety                                | 61              | 3                                    | <b>71</b>                                             | 26                               | 57                           | 4                                    | <b>84</b>                                             | 12                               |
| Amount                                 | 61              | 0                                    | 48                                                    | 53                               | 56                           | 2                                    | <b>73</b>                                             | 25                               |
| Appetite                               | 61              | 2                                    | 53                                                    | 46                               | 56                           | 2                                    | 61                                                    | 38                               |
| Mealtime behaviour                     | 61              | 8                                    | 57                                                    | 34                               | 57                           | 5                                    | <b>68</b>                                             | 26                               |
| Mealtime Interaction                   | 60              | 5                                    | 30                                                    | 65                               | 57                           | 0                                    | 21                                                    | <b>79</b>                        |
| Social participation                   | 60              | 10                                   | 37                                                    | 53                               | 57                           | 2                                    | 25                                                    | <b>74</b>                        |
| Child's understanding of mealtimes     | 60              | 3                                    | 38                                                    | 58                               | 57                           | 2                                    | 58                                                    | 40                               |
| Parent's understanding of child's EDSD | 60              | 0                                    | 5                                                     | <b>95</b>                        | 57                           | 0                                    | 7                                                     | <b>93</b>                        |

The above figures are for those respondents who were able to score individual interventions (i.e. those who had used them) and therefore do not include those who reported being unable to score or for whom data was missing. Percentages were rounded to the nearest whole number and therefore rounded totals are occasionally different to 100%. Scores above the consensus rating of  $\geq 67\%$  are shown in bold.
