# Supplementary material for: Developing the FEEDS toolkit of parent-delivered interventions for eating, drinking and swallowing difficulties in young children with neurodisability: findings from a Delphi survey and stakeholder consultation workshops
Source: PubMed Central journal article supplement — BMJ Paediatr Open. 2022 Apr 28;6(1):e001425. doi: 10.1136/bmjpo-2022-001425 (PMC9058804; doi:10.1136/bmjpo-2022-001425), 2022-04-28
Supplement: bmjpo-2022-001425supp001.pdf [file bmjpo-2022-001425supp001.pdf]

**Supplementary Table 1. Characteristics of respondents who completed both rounds of Delphi Survey and those who only completed Round 2**

|                                          | Round 1<br>and 2<br>N=103 | Round 2<br>only<br>N=19 |
|------------------------------------------|---------------------------|-------------------------|
| <b>Role</b>                              |                           |                         |
| Parent                                   | 52 (51) <sup>c</sup>      | 9 (47)                  |
| Health Professional                      | 51 (50) <sup>c</sup>      | 10 (53)                 |
| <b>Age</b>                               |                           |                         |
| Under 20 years                           | 0 (0)                     | 0 (0)                   |
| 21-30 years                              | 5 (5)                     | 0 (0)                   |
| 31-40 years                              | 28 (27)                   | 12 (63)                 |
| 41-50 years                              | 47 (46)                   | 5 (26)                  |
| 51-60 years                              | 22 (21)                   | 2 (11)                  |
| 61-70 years                              | 0 (0)                     | 0 (0)                   |
| Over 70 years                            | 1 (1)                     | 0 (0)                   |
| Missing                                  | 0 (0)                     | 0 (0)                   |
| <b>Gender</b>                            |                           |                         |
| Female                                   | 98 (95)                   | 18 (95)                 |
| Male                                     | 5 (5)                     | 1 (5)                   |
| Prefer not to say                        | 0 (0)                     | 0 (0)                   |
| Missing                                  | 0 (0)                     | 0 (0)                   |
| <b>Location</b>                          |                           |                         |
| England                                  |                           |                         |
| North East                               | 15 (15)                   | 3 (16)                  |
| North West                               | 8 (8)                     | 1 (5)                   |
| Yorkshire and Humber                     | 9 (9)                     | 2 (11)                  |
| Midlands                                 | 15 (15)                   | 4 (21)                  |
| South East including                     | 35 (34)                   | 6 (32)                  |
| London                                   |                           |                         |
| South West England                       | 10 (10)                   | 1 (5)                   |
| Scotland                                 | 5 (5)                     | 2 (11)                  |
| Northern Ireland                         | 2 (2)                     | 0 (0)                   |
| Wales                                    | 3 (3)                     | 0 (0)                   |
| Missing                                  | 1 (1)                     | 0 (0)                   |
| <b>Ethnicity</b>                         |                           |                         |
| White                                    | 98 (95)                   | 16 (84)                 |
| Black / African / Caribbean /            | 0 (0)                     | 1 (5)                   |
| Black British                            |                           |                         |
| Asian / Asian British                    | 3 (3)                     | 1 (5)                   |
| Mixed / Multiple ethnic group            | 2 (2)                     | 0 (0)                   |
| Other ethnic group                       | 0 (0)                     | 1 (5)                   |
| Prefer not to say                        | 0 (0)                     | 0 (0)                   |
| Missing                                  | 0 (0)                     | 0 (0)                   |
| <b>Type of EDSD of child<sup>a</sup></b> |                           |                         |
| Physical EDSD                            | 21 (20)                   | 1 (5)                   |
| Non-physical EDSD                        | 28 (27)                   | 7 (37)                  |
| Mixed EDSD <sup>b</sup>                  | 54 (52)                   | 11 (58)                 |
| Missing                                  | 0 (0)                     | 0 (0)                   |

<sup>a</sup> EDSD refers to eating, drinking and swallowing difficulties. <sup>b</sup> Mixed EDSD refers to children with physical and non-physical causes to their EDSD. <sup>c</sup> Percentages add up to more than 100% as a result of rounding the number to the nearest whole number.
