# Supplementary material for: Developing the FEEDS toolkit of parent-delivered interventions for eating, drinking and swallowing difficulties in young children with neurodisability: findings from a Delphi survey and stakeholder consultation workshops
Source: PubMed Central journal article supplement — BMJ Paediatr Open. 2022 Apr 28;6(1):e001425. doi: 10.1136/bmjpo-2022-001425 (PMC9058804; doi:10.1136/bmjpo-2022-001425), 2022-04-28
Supplement: bmjpo-2022-001425supp002.pdf [file bmjpo-2022-001425supp002.pdf]

**Supplementary Table 2. Characteristics of non-respondents to the Delphi Survey**

|                                             | Non-respondents<br>N=195  |                       |
|---------------------------------------------|---------------------------|-----------------------|
|                                             | Parents<br>N=269<br>n (%) | HPs<br>N=335<br>n (%) |
| Age (no missing data)                       |                           |                       |
| Under 20 years                              | 5 (2)                     | - <sup>a</sup>        |
| 21-30 years                                 | 23 (9)                    | - <sup>a</sup>        |
| 31-40 years                                 | 130 (48)                  | - <sup>a</sup>        |
| 41-50 years                                 | 95 (35)                   | - <sup>a</sup>        |
| 51-60 years                                 | 14 (5)                    | - <sup>a</sup>        |
| 61 years and over                           | 2 (1)                     | - <sup>a</sup>        |
| Gender (no missing data)                    |                           |                       |
| Female                                      | 254 (94)                  | - <sup>a</sup>        |
| Male                                        | 15 (6)                    | - <sup>a</sup>        |
| Prefer not to say                           | 0 (0)                     | - <sup>a</sup>        |
| Location                                    |                           |                       |
| England                                     |                           |                       |
| North East                                  | 48 (18)                   | 29 (9)                |
| North West                                  | 20 (7)                    | 22 (7)                |
| Yorkshire and Humber                        | 28 (10)                   | 49 (15)               |
| Midlands                                    | 66 (25)                   | 47 (14)               |
| South East including London                 | 56 (21)                   | 136 (41)              |
| South West                                  | 29 (11)                   | 14 (4)                |
| Scotland                                    | 11 (4)                    | 14 (4)                |
| Northern Ireland                            | 4 (2)                     | 11 (3)                |
| Wales                                       | 7 (3)                     | 13 (4)                |
| Missing                                     | 0 (0)                     | 0 (0)                 |
| Ethnicity (no missing data)                 |                           |                       |
| White                                       | 234 (87)                  | - <sup>a</sup>        |
| Asian / Asian British                       | 22 (8)                    | - <sup>a</sup>        |
| Black / African / Caribbean / Black British | 4 (2)                     | - <sup>a</sup>        |
| Mixed / Multiple ethnic group               | 7 (3)                     | - <sup>a</sup>        |
| Other ethnic group                          | 0 (0)                     | - <sup>a</sup>        |
| Prefer not to say                           | 2 (1)                     | - <sup>a</sup>        |
| Nature of child's EDSD                      |                           |                       |
| Physical EDSD                               | 58 (22)                   | 63 (19)               |
| Nonphysical EDSD                            | 141 (52)                  | 23 (7)                |
| Mixed EDSD                                  | 59 (22)                   | 248 (74)              |
| Missing                                     | 11 (4)                    | 0 (0)                 |

<sup>a</sup> Data not collected in national survey.
