# Supplementary material for: Developing the FEEDS toolkit of parent-delivered interventions for eating, drinking and swallowing difficulties in young children with neurodisability: findings from a Delphi survey and stakeholder consultation workshops
Source: PubMed Central journal article supplement — BMJ Paediatr Open. 2022 Apr 28;6(1):e001425. doi: 10.1136/bmjpo-2022-001425 (PMC9058804; doi:10.1136/bmjpo-2022-001425), 2022-04-28
Supplement: bmjpo-2022-001425supp004.pdf [file bmjpo-2022-001425supp004.pdf]

**Supplementary Table 4. Parents' and health professionals' ratings of interventions on Round 2 of the Delphi Survey**

| Intervention                             | Parents<br>N=61 |                                      |                                                       |                                  | Health professionals<br>N=61 |                                      |                                                       |                                  |
|------------------------------------------|-----------------|--------------------------------------|-------------------------------------------------------|----------------------------------|------------------------------|--------------------------------------|-------------------------------------------------------|----------------------------------|
|                                          | n               | Not Important<br>(score of 0-3)<br>% | Important but<br>not essential<br>(score of 4-6)<br>% | Essential<br>(score of 7-9)<br>% | n                            | Not important<br>(score of 0-3)<br>% | Important but<br>not essential<br>(score of 4-6)<br>% | Essential<br>(score of 7-9)<br>% |
| Modifying environment                    | 60              | 2                                    | 22                                                    | <b>77</b>                        | 57                           | 0                                    | 5                                                     | <b>95</b>                        |
| Positioning                              | 54              | 2                                    | 2                                                     | <b>96</b>                        | 57                           | 0                                    | 0                                                     | <b>100</b>                       |
| Modifying equipment                      | 54              | 4                                    | 4                                                     | <b>93</b>                        | 57                           | 0                                    | 11                                                    | <b>90</b>                        |
| Scheduling of meals                      | 58              | 5                                    | 45                                                    | 50                               | 57                           | 0                                    | 18                                                    | <b>83</b>                        |
| Modifying consistency of food or drink   | 56              | 2                                    | 20                                                    | <b>79</b>                        | 54                           | 0                                    | 4                                                     | <b>96</b>                        |
| Modifying other aspects of food or drink | 59              | 3                                    | 10                                                    | <b>86</b>                        | 57                           | 2                                    | 16                                                    | <b>83</b>                        |
| Modifying placement of food              | 48              | 2                                    | 23                                                    | <b>75</b>                        | 57                           | 0                                    | 11                                                    | <b>90</b>                        |
| Enhancing communication                  | 59              | 2                                    | 12                                                    | <b>86</b>                        | 57                           | 0                                    | 11                                                    | <b>90</b>                        |
| Visual supports                          | 54              | 4                                    | 44                                                    | 52                               | 57                           | 2                                    | 26                                                    | <b>72</b>                        |
| Responding to a child's cues             | 55              | 0                                    | 7                                                     | <b>93</b>                        | 56                           | 0                                    | 4                                                     | <b>96</b>                        |
| Pace of feeding                          | 56              | 0                                    | 11                                                    | <b>89</b>                        | 56                           | 0                                    | 0                                                     | <b>100</b>                       |
| Physical supports                        | 44              | 5                                    | 14                                                    | <b>82</b>                        | 57                           | 4                                    | 16                                                    | <b>81</b>                        |
| Medication                               | 47              | 4                                    | 9                                                     | <b>87</b>                        | 57                           | 2                                    | 7                                                     | <b>91</b>                        |
| Energy supplements                       | 42              | 2                                    | 29                                                    | <b>69</b>                        | 55                           | 0                                    | 27                                                    | <b>73</b>                        |
| Vitamin or nutritional supplements       | 54              | 0                                    | 15                                                    | <b>85</b>                        | 55                           | 0                                    | 26                                                    | <b>75</b>                        |
| Oral and sensory desensitisation         | 54              | 6                                    | 13                                                    | <b>82</b>                        | 57                           | 9                                    | 16                                                    | <b>75</b>                        |
| Oral-motor exercises                     | 50              | 4                                    | 26                                                    | <b>70</b>                        | 57                           | 35                                   | 30                                                    | 35                               |
| Graded exposure to new food              | 60              | 3                                    | 27                                                    | <b>70</b>                        | 57                           | 4                                    | 12                                                    | <b>84</b>                        |
| Graded exposure to new textures          | 59              | 2                                    | 2                                                     | <b>76</b>                        | 57                           | 0                                    | 19                                                    | <b>81</b>                        |
| Changing behaviour at mealtimes          | 59              | 7                                    | 36                                                    | 58                               | 57                           | 2                                    | 42                                                    | 56                               |
| Modelling                                | 60              | 2                                    | 22                                                    | <b>77</b>                        | 57                           | 0                                    | 18                                                    | <b>83</b>                        |
| Training to self-feed                    | 56              | 5                                    | 39                                                    | 55                               | 56                           | 4                                    | 50                                                    | 46                               |
| Support for parents                      | 60              | 2                                    | 3                                                     | <b>95</b>                        | 56                           | 0                                    | 4                                                     | <b>96</b>                        |
| Sharing information                      | 60              | 0                                    | 0                                                     | <b>100</b>                       | 57                           | 0                                    | 4                                                     | <b>97</b>                        |
| Psychological support for child          | 52              | 4                                    | 19                                                    | <b>77</b>                        | 56                           | 4                                    | 38                                                    | 59                               |

The above figures are for those respondents who were able to score individual interventions (i.e. those who had used them) and therefore do not include those who reported being unable to score or for whom data was missing. Percentages were rounded to the nearest whole number and therefore rounded totals are occasionally different to 100%. Scores above the consensus rating of  $\geq 67\%$  are shown in bold.
