# Supplementary material for: Developing the FEEDS toolkit of parent-delivered interventions for eating, drinking and swallowing difficulties in young children with neurodisability: findings from a Delphi survey and stakeholder consultation workshops
Source: PubMed Central journal article supplement — BMJ Paediatr Open. 2022 Apr 28;6(1):e001425. doi: 10.1136/bmjpo-2022-001425 (PMC9058804; doi:10.1136/bmjpo-2022-001425), 2022-04-28
Supplement: bmjpo-2022-001425supp005.pdf [file bmjpo-2022-001425supp005.pdf]

**Supplementary Table 5. Parents' and health professionals' ratings of outcomes on Round 1 of the Delphi Survey**

|                                        | Parents<br>N=81 |                                      |                                                       |                                  | Health professionals<br>N=76 |                                      |                                                       |                                  |
|----------------------------------------|-----------------|--------------------------------------|-------------------------------------------------------|----------------------------------|------------------------------|--------------------------------------|-------------------------------------------------------|----------------------------------|
|                                        | n               | Not Important<br>(score of 0-3)<br>% | Important but<br>not essential<br>(score of 4-6)<br>% | Essential<br>(score of 7-9)<br>% | n                            | Not important<br>(score of 0-3)<br>% | Important but<br>not essential<br>(score of 4-6)<br>% | Essential<br>(score of 7-9)<br>% |
| General Health                         | 80              | 1                                    | 10                                                    | <b>89</b>                        | 76                           | 0                                    | 7                                                     | <b>93</b>                        |
| Weight                                 | 80              | 6                                    | 41                                                    | 53                               | 76                           | 4                                    | 45                                                    | 51                               |
| Height                                 | 78              | 18                                   | 51                                                    | 31                               | 76                           | 18                                   | 50                                                    | 32                               |
| Growth                                 | 79              | 0                                    | 25                                                    | <b>75</b>                        | 76                           | 0                                    | 24                                                    | <b>76</b>                        |
| Nutrition                              | 81              | 0                                    | 11                                                    | <b>89</b>                        | 76                           | 0                                    | 3                                                     | <b>97</b>                        |
| Child's enjoyment of mealtimes         | 80              | 1                                    | 16                                                    | <b>83</b>                        | 76                           | 0                                    | 9                                                     | <b>91</b>                        |
| Parent's enjoyment of mealtimes        | 81              | 7                                    | 51                                                    | 42                               | 76                           | 0                                    | 24                                                    | <b>76</b>                        |
| Quality of life of child               | 81              | 1                                    | 4                                                     | <b>95</b>                        | 75                           | 0                                    | 8                                                     | <b>92</b>                        |
| Quality of life of family              | 81              | 1                                    | 21                                                    | <b>78</b>                        | 75                           | 0                                    | 13                                                    | <b>87</b>                        |
| Mental health of parent                | 81              | 0                                    | 17                                                    | <b>83</b>                        | 76                           | 0                                    | 16                                                    | <b>84</b>                        |
| Safety                                 | 78              | 0                                    | 3                                                     | <b>97</b>                        | 75                           | 0                                    | 3                                                     | <b>97</b>                        |
| Oral-motor control                     | 76              | 0                                    | 13                                                    | <b>87</b>                        | 74                           | 3                                    | 23                                                    | <b>74</b>                        |
| Efficiency                             | 80              | 13                                   | 44                                                    | 44                               | 75                           | 5                                    | 35                                                    | 60                               |
| Independence                           | 80              | 13                                   | 28                                                    | 60                               | 75                           | 3                                    | <b>67</b>                                             | 31                               |
| Variety                                | 81              | 5                                    | 44                                                    | 51                               | 75                           | 4                                    | <b>73</b>                                             | 23                               |
| Amount                                 | 81              | 4                                    | 35                                                    | 62                               | 75                           | 5                                    | 55                                                    | 40                               |
| Appetite                               | 81              | 3                                    | 38                                                    | 59                               | 75                           | 3                                    | 53                                                    | 44                               |
| Mealtime behaviour                     | 80              | 14                                   | 45                                                    | 41                               | 74                           | 10                                   | 61                                                    | 30                               |
| Mealtime Interaction                   | 79              | 4                                    | 35                                                    | 61                               | 74                           | 1                                    | 18                                                    | <b>81</b>                        |
| Social participation                   | 80              | 4                                    | 46                                                    | 50                               | 74                           | 1                                    | 22                                                    | <b>77</b>                        |
| Child's understanding of mealtimes     | 80              | 4                                    | 45                                                    | 51                               | 74                           | 4                                    | 45                                                    | 51                               |
| Parent's understanding of child's EDSD | 80              | 1                                    | 10                                                    | <b>89</b>                        | 72                           | 1                                    | 10                                                    | <b>89</b>                        |

The above figures are for those respondents who were able to score individual interventions (i.e. those who had used them) and therefore do not include those who reported being unable to score or for whom data was missing. Percentages were rounded to the nearest whole number and therefore rounded totals are occasionally different to 100%. Scores above the consensus rating of  $\geq 67\%$  are shown in bold.
